# Supplementary material for: Cluster dynamics of heterometallic trinuclear clusters during ligand substitution, redox chemistry, and group transfer processes
Source: Royal Society of Chemistry journal article supplement (doi:10.1039/d3sc03606e), 2024-01-01

## Electronic Supplementary Information

### **Cluster dynamics of heterometallic trinuclear clusters during ligand substitution, redox chemistry, and group transfer processes**

Cristin E. Juda, Rex C. Handford, Amymarie K. Bartholomew, Tamara M. Powers, Nina X. Gu, Elisabeth Meyers, Nikolaj Roth, Yu-Sheng Chen, Shao-Liang Zheng, Theodore A. Betley

## Table of Contents

|                                                                                                                                                                                                                                                                                                                                                                                                                                                                                                                                                                          |     |
|--------------------------------------------------------------------------------------------------------------------------------------------------------------------------------------------------------------------------------------------------------------------------------------------------------------------------------------------------------------------------------------------------------------------------------------------------------------------------------------------------------------------------------------------------------------------------|-----|
| <b>Experimental Methods</b> .....                                                                                                                                                                                                                                                                                                                                                                                                                                                                                                                                        | S4  |
| <b>Zero Field <sup>57</sup>Fe Mössbauer Spectroscopy</b> .....                                                                                                                                                                                                                                                                                                                                                                                                                                                                                                           | S11 |
| <b>Table S1.</b> <sup>57</sup> Fe Mössbauer Parameters for Selected Complexes.....                                                                                                                                                                                                                                                                                                                                                                                                                                                                                       | S11 |
| <b>Figure S1.</b> Zero-field <sup>57</sup> Fe Mössbauer spectrum of (t <sup>bs</sup> L)Fe <sub>3</sub> (py) ( <b>2</b> ).....                                                                                                                                                                                                                                                                                                                                                                                                                                            | S12 |
| <b>Figure S2.</b> Zero-field <sup>57</sup> Fe Mössbauer spectrum of [Na(thf)][(t <sup>bs</sup> L)Fe <sub>2</sub> Na(thf)] ( <b>4</b> ).....                                                                                                                                                                                                                                                                                                                                                                                                                              | S13 |
| <b>Figure S3.</b> Zero-field <sup>57</sup> Fe Mössbauer spectrum of (t <sup>bs</sup> L)Fe <sub>2</sub> Zn(thf) ( <b>5</b> ).....                                                                                                                                                                                                                                                                                                                                                                                                                                         | S14 |
| <b>Figure S4.</b> Zero-field <sup>57</sup> Fe Mössbauer spectrum of (t <sup>bs</sup> L)Fe <sub>2</sub> Zn(py) ( <b>6</b> ).....                                                                                                                                                                                                                                                                                                                                                                                                                                          | S15 |
| <b>Figure S5.</b> Zero-field <sup>57</sup> Fe Mössbauer spectrum of [NBu <sub>4</sub> ][(t <sup>bs</sup> L)Fe <sub>n</sub> Zn <sub>3-n</sub> (μ <sup>3</sup> -Cl)] ( <b>9</b> ).....                                                                                                                                                                                                                                                                                                                                                                                     | S16 |
| <b>Figure S6.</b> Zero-field <sup>57</sup> Fe Mössbauer spectrum of [NBu <sub>4</sub> ][(t <sup>bs</sup> L)Fe <sub>3</sub> (μ <sup>3</sup> -Cl)] ( <b>7</b> ).....                                                                                                                                                                                                                                                                                                                                                                                                       | S17 |
| <b>Figure S7.</b> Zero-field <sup>57</sup> Fe Mössbauer spectrum of crude (t <sup>bs</sup> L)Fe <sub>2</sub> Zn(μ <sup>3</sup> -NPh) ( <b>11</b> ).....                                                                                                                                                                                                                                                                                                                                                                                                                  | S18 |
| <b>Figure S8.</b> Zero-field <sup>57</sup> Fe Mössbauer Spectrum of (t <sup>bs</sup> L)Fe <sub>2</sub> Zn(μ <sup>3</sup> -NPh)(py) ( <b>12</b> ).....                                                                                                                                                                                                                                                                                                                                                                                                                    | S19 |
| <b>Figure S9.</b> Zero-field <sup>57</sup> Fe Mössbauer Spectrum of (t <sup>bs</sup> L)Fe <sub>3</sub> (μ <sup>3</sup> -N(3,5-(CF <sub>3</sub> ) <sub>2</sub> C <sub>6</sub> H <sub>3</sub> )) ( <b>13</b> ).....                                                                                                                                                                                                                                                                                                                                                        | S20 |
| <b>Figure S10.</b> Zero-field <sup>57</sup> Fe Mössbauer Spectrum of (t <sup>bs</sup> L)Fe <sub>2</sub> Zn(μ <sup>3</sup> -N(3,5-(CF <sub>3</sub> ) <sub>2</sub> C <sub>6</sub> H <sub>3</sub> ))(py) ( <b>14</b> ).....                                                                                                                                                                                                                                                                                                                                                 | S21 |
| <b>Figure S11.</b> Zero-field <sup>57</sup> Fe Mössbauer Spectrum of [CoCp* <sub>2</sub> ][(t <sup>bs</sup> L)Fe <sub>3</sub> (μ <sup>3</sup> -N(3,5-(CF <sub>3</sub> ) <sub>2</sub> C <sub>6</sub> H <sub>3</sub> ))] ( <b>15</b> ).....                                                                                                                                                                                                                                                                                                                                | S22 |
| <b>Figure S12.</b> Zero-field <sup>57</sup> Fe Mössbauer Spectrum of [2,2,2-cryptand(K)][(t <sup>bs</sup> L)Fe <sub>2</sub> Zn(μ <sup>3</sup> -N(3,5-(CF <sub>3</sub> ) <sub>2</sub> C <sub>6</sub> H <sub>3</sub> ))] ( <b>16</b> ).....                                                                                                                                                                                                                                                                                                                                | S23 |
| <b>X-Ray Fluorescence Spectroscopy</b> .....                                                                                                                                                                                                                                                                                                                                                                                                                                                                                                                             | S24 |
| <b>Figure S13.</b> Solid-state X-ray fluorescence calibration curve.....                                                                                                                                                                                                                                                                                                                                                                                                                                                                                                 | S24 |
| <b>Figure S14.</b> X-ray fluorescence spectrum of (t <sup>bs</sup> L)Fe <sub>2</sub> Zn(thf) ( <b>5</b> ).....                                                                                                                                                                                                                                                                                                                                                                                                                                                           | S25 |
| <b>Figure S15.</b> X-ray fluorescence spectrum of (t <sup>bs</sup> L)Fe <sub>2</sub> Zn(py) ( <b>6</b> ).....                                                                                                                                                                                                                                                                                                                                                                                                                                                            | S26 |
| <b>Figure S16.</b> X-ray fluorescence spectrum of [NBu <sub>4</sub> ][(t <sup>bs</sup> L)Fe <sub>n</sub> Zn <sub>3-n</sub> (μ <sup>3</sup> -Cl)] ( <b>9</b> ).....                                                                                                                                                                                                                                                                                                                                                                                                       | S27 |
| <b>Figure S17.</b> X-ray fluorescence spectrum of (t <sup>bs</sup> L)Fe <sub>2</sub> Zn(μ <sup>3</sup> -NPh)(py) ( <b>12</b> ).....                                                                                                                                                                                                                                                                                                                                                                                                                                      | S28 |
| <b>Figure S18.</b> X-ray fluorescence spectrum of (t <sup>bs</sup> L)Fe <sub>2</sub> Zn(μ <sup>3</sup> -N(3,5-(CF <sub>3</sub> ) <sub>2</sub> C <sub>6</sub> H <sub>3</sub> ))(py) ( <b>14</b> ).....                                                                                                                                                                                                                                                                                                                                                                    | S29 |
| <b>Figure S19.</b> X-ray fluorescence spectrum of [2,2,2-cryptand(K)][(t <sup>bs</sup> L)Fe <sub>2</sub> Zn(μ <sup>3</sup> -N(3,5-(CF <sub>3</sub> ) <sub>2</sub> C <sub>6</sub> H <sub>3</sub> ))] ( <b>16</b> ).....                                                                                                                                                                                                                                                                                                                                                   | S30 |
| <b>NMR Spectroscopy</b> .....                                                                                                                                                                                                                                                                                                                                                                                                                                                                                                                                            | S31 |
| <b>Figure S20.</b> Comparison of <sup>1</sup> H NMR spectra of [NBu <sub>4</sub> ][(t <sup>bs</sup> L)Fe <sub>n</sub> Zn <sub>3-n</sub> (μ <sup>3</sup> -Cl)] ( <b>9</b> ) with that of the analogous homometallic species [NBu <sub>4</sub> ][(t <sup>bs</sup> L)Fe <sub>3</sub> (μ <sup>3</sup> -Cl)] ( <b>7</b> ) and [NBu <sub>4</sub> ][(t <sup>bs</sup> L)Zn <sub>3</sub> (μ <sup>3</sup> -Cl)] ( <b>8</b> ).....                                                                                                                                                  | S31 |
| <b>Figure S21.</b> <sup>1</sup> H NMR monitoring of a mixture [NBu <sub>4</sub> ][(t <sup>bs</sup> L)Fe <sub>3</sub> (μ <sup>3</sup> -Cl)] ( <b>7</b> ) and [NBu <sub>4</sub> ][(t <sup>bs</sup> L)Zn <sub>3</sub> (μ <sup>3</sup> -Cl)] ( <b>8</b> ).....                                                                                                                                                                                                                                                                                                               | S32 |
| <b>Figure S22.</b> <sup>1</sup> H NMR monitoring of a mixture of (t <sup>bs</sup> L)Fe <sub>2</sub> Zn(thf) ( <b>5</b> ) and [NBu <sub>4</sub> ][(t <sup>bs</sup> L)Fe <sub>3</sub> (μ <sup>3</sup> -Cl)] ( <b>7</b> ).....                                                                                                                                                                                                                                                                                                                                              | S33 |
| <b>Figure S23.</b> <sup>1</sup> H NMR monitoring of a mixture of (t <sup>bs</sup> L)Fe <sub>2</sub> Zn(thf) ( <b>5</b> ) and [NBu <sub>4</sub> ][(t <sup>bs</sup> L)Fe <sub>3</sub> (μ <sup>3</sup> -Cl)] ( <b>8</b> ).....                                                                                                                                                                                                                                                                                                                                              | S34 |
| <b>Figure S24.</b> <sup>1</sup> H NMR monitoring of a mixture of (t <sup>bs</sup> L)Fe <sub>2</sub> Zn(thf) ( <b>5</b> ) and FeCl <sub>2</sub> .....                                                                                                                                                                                                                                                                                                                                                                                                                     | S35 |
| <b>Figure S25.</b> <sup>1</sup> H NMR monitoring of a mixture of (t <sup>bs</sup> L)Fe <sub>2</sub> Zn(thf) ( <b>5</b> ) and ZnCl <sub>2</sub> .....                                                                                                                                                                                                                                                                                                                                                                                                                     | S36 |
| <b>Figure S26.</b> Comparison of <sup>1</sup> H NMR spectrum of (t <sup>bs</sup> L)Fe <sub>3</sub> (μ <sup>3</sup> -NPh) ( <b>10</b> ) with (t <sup>bs</sup> L)Fe <sub>2</sub> Zn(μ <sup>3</sup> -NPh)(py) ( <b>12</b> ) and the reaction mixture formed by treatment of (t <sup>bs</sup> L)Fe <sub>2</sub> Zn(py) ( <b>6</b> ) with phenyl azide. Integrated <sup>19</sup> F NMR spectrum of mixture upon reaction of (t <sup>bs</sup> L)Fe <sub>2</sub> Zn(py) ( <b>6</b> ) and 3,5-(CF <sub>3</sub> ) <sub>2</sub> C <sub>6</sub> H <sub>3</sub> N <sub>3</sub> ..... | S37 |
| <b>Figure S27.</b> <sup>19</sup> F NMR spectra for [CoCp* <sub>2</sub> ][(t <sup>bs</sup> L)Fe <sub>3</sub> (μ <sup>3</sup> -N(3,5-(CF <sub>3</sub> ) <sub>2</sub> C <sub>6</sub> H <sub>3</sub> ))] ( <b>15</b> ) (a) and [2,2,2-cryptand(K)][(t <sup>bs</sup> L)Fe <sub>2</sub> Zn(μ <sup>3</sup> -N(3,5-(CF <sub>3</sub> ) <sub>2</sub> C <sub>6</sub> H <sub>3</sub> ))] ( <b>16</b> ) (b).....                                                                                                                                                                      | S38 |
| <b>SQUID Magnetometry</b> .....                                                                                                                                                                                                                                                                                                                                                                                                                                                                                                                                          | S39 |
| <b>Figure S28.</b> Plot of χ <sub>M</sub> T for (t <sup>bs</sup> L)Fe <sub>3</sub> (thf) ( <b>1</b> ) over a temperature range of 1.8-300 K.....                                                                                                                                                                                                                                                                                                                                                                                                                         | S40 |
| <b>Figure S29.</b> Plot of reduced magnetization for (t <sup>bs</sup> L)Fe <sub>3</sub> (thf) ( <b>1</b> ) over a temperature range of 1.8-10 K and an applied field range of 1.0-7.0 T.....                                                                                                                                                                                                                                                                                                                                                                             | S41 |
| <b>Figure S30.</b> Plot of magnetization for (t <sup>bs</sup> L)Fe <sub>3</sub> (thf) ( <b>1</b> ) obtained at 100 K over an applied field of 0-3.0 T.....                                                                                                                                                                                                                                                                                                                                                                                                               | S42 |
| <b>Figure S31.</b> Plot of χ <sub>M</sub> T data for (t <sup>bs</sup> L)Fe <sub>2</sub> Zn(thf) ( <b>5</b> ) over a temperature range of 1.8-300 K.....                                                                                                                                                                                                                                                                                                                                                                                                                  | S43 |
| <b>Figure S32.</b> Plot of reduced magnetization for (t <sup>bs</sup> L)Fe <sub>2</sub> Zn(thf) ( <b>5</b> ) over a temperature range of 1.8-10 K and an applied field range of 1.0-7.0 T.....                                                                                                                                                                                                                                                                                                                                                                           | S44 |
| <b>Figure S33.</b> Plot of magnetization for (t <sup>bs</sup> L)Fe <sub>2</sub> Zn(thf) ( <b>5</b> ) obtained at 100 K over an applied field of 0-3.0 T.....                                                                                                                                                                                                                                                                                                                                                                                                             | S45 |

|                                                                                                                                    |     |
|------------------------------------------------------------------------------------------------------------------------------------|-----|
| <b>X-Ray Diffraction Techniques</b> .....                                                                                          | S46 |
| <b>Table S2.</b> X-ray diffraction experimental details .....                                                                      | S48 |
| <b>Table S3.</b> Selected bond metrics (Å) of trinuclear complexes.....                                                            | S52 |
| <b>Table S4.</b> Selected bond metrics of reaction products.....                                                                   | S53 |
| <b>Figure S34.</b> Solid state structure of $(^{tbs}L)Fe_3(py)$ ( <b>2</b> ).....                                                  | S54 |
| <b>Table S5.</b> Selected bond metrics for <b>2</b> (Å).....                                                                       | S54 |
| <b>Figure S35.</b> Solid state structure of $[Na(thf)(OEt_2)][(^{tbs}L)Fe_2Na(OEt_2)]$ ( <b>4</b> ).....                           | S55 |
| <b>Table S6.</b> Selected bond metrics for <b>4</b> (Å).....                                                                       | S55 |
| <b>Figure S36.</b> Solid state structure of $(^{tbs}L)Fe_2Zn(thf)$ ( <b>5</b> ).....                                               | S56 |
| <b>Table S7.</b> Selected bond metrics for <b>5</b> (Å).....                                                                       | S56 |
| <b>Figure S37.</b> Solid state structure of $(^{tbs}L)Fe_2Zn(py)$ ( <b>6</b> ).....                                                | S57 |
| <b>Table S8.</b> Selected bond metrics for <b>6</b> (Å).....                                                                       | S57 |
| <b>Figure S38.</b> Solid state structure of $[NBu_4][(^{tbs}L)Fe_nZn_{3-n}(\mu^3-Cl)]$ ( <b>9</b> ).....                           | S58 |
| <b>Table S9.</b> Selected bond metrics for <b>9</b> (Å).....                                                                       | S58 |
| <b>Figure S39.</b> Solid state structure of $[NBu_4][(^{tbs}L)Fe_3(\mu^3-Cl)]$ ( <b>7</b> ).....                                   | S59 |
| <b>Table S10.</b> Selected bond metrics for <b>7</b> (Å).....                                                                      | S59 |
| <b>Figure S40.</b> Solid state structure of $[NBu_4][(^{tbs}L)Zn_3(\mu^3-Cl)]$ ( <b>8</b> ).....                                   | S60 |
| <b>Table S11.</b> Selected bond metrics for <b>8</b> (Å).....                                                                      | S60 |
| <b>Figure S41.</b> Solid state structure of $(^{tbs}L)Fe_2Zn(\mu^3-NPh)$ ( <b>11</b> ).....                                        | S61 |
| <b>Table S12.</b> Selected bond metrics for <b>11</b> (Å).....                                                                     | S61 |
| <b>Figure S42.</b> Solid state structure of $(^{tbs}L)Fe_2Zn((\mu^3-NPh)(py))$ ( <b>12</b> ).....                                  | S62 |
| <b>Table S13.</b> Selected bond metrics for <b>12</b> (Å).....                                                                     | S62 |
| <b>Figure S43.</b> Solid state structure of $(^{tbs}L)Fe_3(\mu^3-N(3,5-(CF_3)_2C_6H_3))$ ( <b>13</b> ).....                        | S63 |
| <b>Table S14.</b> Selected bond metrics for <b>13</b> (Å). <sup>a</sup> .....                                                      | S63 |
| <b>Figure S44.</b> Solid state structure of $(^{tbs}L)Fe_2Zn(\mu^3-N(3,5-(CF_3)_2C_6H_3))(py)$ ( <b>14</b> ).....                  | S64 |
| <b>Table S15.</b> Selected bond metrics for <b>14</b> (Å).....                                                                     | S64 |
| <b>Figure S45.</b> Solid state structure of $[CoCp^*_2][(^{tbs}L)Fe_3(\mu^3-N(3,5-(CF_3)_2C_6H_3))]$ ( <b>15</b> ).....            | S65 |
| <b>Table S16.</b> Selected bond metrics for <b>15</b> (Å).....                                                                     | S65 |
| <b>Figure S46.</b> Solid state structure of $[2,2,2-cryptand(K)][(^{tbs}L)Fe_2Zn(\mu^3-N(3,5-(CF_3)_2C_6H_3))]$ ( <b>16</b> )..... | S66 |
| <b>Table S17.</b> Selected bond metrics for two clusters (A and B) in unit cell of <b>16</b> (Å).....                              | S66 |
| <b>References</b> .....                                                                                                            | S67 |

## Experimental Methods

**Materials and methods.** All manipulations involving metal complexes were carried out using standard Schlenk line or glovebox techniques under a dinitrogen atmosphere. All glassware was oven-dried for a minimum of 8 h and cooled in an evacuated antechamber prior to use in a glovebox. Celite ® 545 (J. T. Baker) was dried in a Schlenk flask for 24 h under dynamic vacuum while heating to at least 150 °C prior to use in the drybox. Benzene, diethyl ether, hexanes, and tetrahydrofuran (THF) were dried and deoxygenated on a Glass Contour System (SG Water USA, Nashua, NH) and stored over 4 Å molecular sieves (Strem) prior to use. Anhydrous pentane and pyridine were purchased from Sigma Aldrich and stored over 4 Å molecular sieves prior to use. Benzene-*d*<sub>6</sub> and tetrahydrofuran-*d*<sub>8</sub> were purchased from Cambridge Isotope Laboratories and were degassed and stored over 4 Å molecular sieves prior to use. Non-halogenated solvents were typically tested with a standard purple solution of sodium benzophenone ketyl in THF in order to confirm effective oxygen and moisture removal. Ligand (<sup>t</sup>*bs*LH<sub>6</sub>),<sup>1</sup> ligand precursors,<sup>1</sup> (<sup>t</sup>*bs*LH<sub>2</sub>)Fe<sub>2</sub>,<sup>2</sup> and (<sup>t</sup>*bs*L)Fe<sub>3</sub>(thf)<sup>1</sup> were synthesized as previously reported. Fe<sub>2</sub>(N(SiMe<sub>3</sub>)<sub>2</sub>)<sub>4</sub>,<sup>3</sup> Zn(N(SiMe<sub>3</sub>)<sub>2</sub>)<sub>2</sub>,<sup>3</sup> ZnCl<sub>2</sub>py<sub>2</sub>,<sup>4</sup> KC<sub>8</sub>,<sup>5</sup> PhN<sub>3</sub>,<sup>6</sup> and (3,5-CF<sub>3</sub>)<sub>2</sub>C<sub>6</sub>H<sub>3</sub>N<sub>3</sub><sup>7</sup> were prepared following published methods. The adducts Fe(N(SiMe<sub>3</sub>)<sub>2</sub>)<sub>2</sub>(py)<sub>2</sub> and Zn(N(SiMe<sub>3</sub>)<sub>2</sub>)<sub>2</sub>(py) were prepared by adding the appropriate number of equivalents of pyridine to the unsolvated precursors. All other reagents were purchased from commercial vendors and used without further purification unless explicitly stated.

**Physical Measurements.** All of the measurements for the metal complexes were made under anaerobic conditions unless explicitly stated. Elemental analysis of [NBu<sub>4</sub>][(<sup>t</sup>*bs*L)Zn<sub>3</sub>(μ<sup>3</sup>-Cl)] (**8**) was performed by Complete Analysis Laboratories, Inc., Parsippany, NJ. All other elemental analyses were performed in-house on a 2400 Series II CHNS/O Elemental Analyzer manufactured by Perkin Elmer, Inc. <sup>1</sup>H and <sup>19</sup>F NMR spectra were recorded on Varian Unity/Inova 500 or 600 MHz- spectrometers. Chemical shifts in <sup>1</sup>H NMR spectra were referenced to solvent residual resonances (C<sub>6</sub>D<sub>6</sub>, 7.16 ppm; THF-*d*<sub>8</sub>, 3.58 and 1.73 ppm). Chemical shifts in <sup>19</sup>F NMR spectra were referenced to BF<sub>3</sub>(Oet<sub>2</sub>) (-153 ppm) or fluorobenzene (-113 ppm).

**Zero-Field <sup>57</sup>Fe Mössbauer Spectroscopy.** <sup>57</sup>Fe Mössbauer spectra were measured with a constant acceleration spectrometer (SEE Co, Minneapolis, MN). Unless otherwise indicated, all <sup>57</sup>Fe Mössbauer spectra were recorded under zero applied field. Samples were prepared as Paratone-N mulls in a glovebox and frozen in liquid nitrogen prior to handling in air. Isomer shifts are quoted relative to α-Fe metal at room temperature. Data were processed, fitted, and analyzed using an in-house package for IGOR Pro 6 (Wavemetrics, Lake Oswego, OR) written by Evan R. King.

**X-ray Fluorescence Spectroscopy.** X-ray fluorescence analyses were recorded using an Olympus Delta Innov-X XRF analyzer with no additional filter (Olympus, NDT, Inc., Waltham, MA). Samples for the calibration curve were prepared by dissolving ferrocene and *bis*[4,4,4-trifluoro-1-(2-thienyl-1,3-butanedionato)]Zn·(TMEDA) in benzene, and then lyophilizing the solution to afford a homogenous mixture of solids. The areas of the Kα peaks for Fe and Zn were calculated by integration using IGOR Pro 6 (Wavemetrics, Lake Oswego, OR). Quantification was performed using the Kα peak area. Fe:Zn molar ratios in samples were determined from the peak area ratios using a linear fit to the calibration curve (Figure S13).

**X-ray Diffraction Techniques.** All structures were collected on a Bruker three-circle platform goniometer equipped with an Apex II CCD area detector and an Oxford cryostream cooling device at 100 K. Structures were obtained using radiation from a graphite fine-focus sealed tube Mo Kα

(0.71073 Å) source or synchrotron radiation (0.41328 Å) using the Advanced Photon Source (APS) at Argonne National Laboratory. Crystals were mounted on a cryoloop or glass fiber pin using Paratone-N oil. Data were collected as a series of  $\phi$  and/or  $\omega$  scans. Data were integrated using SAINT<sup>8</sup> and scaled with either a numerical or multi-scan absorption correction using SADABS.<sup>8</sup> The structures were solved by intrinsic phasing or direct methods using SHELXT/SHELXS<sup>9</sup> and refined against  $F^2$  on all data by full matrix least squares with SHELXL<sup>9</sup> using the OLEX2 interface.<sup>10</sup> All non-hydrogen atoms were refined anisotropically. Hydrogen atoms were placed at idealized positions and refined using a riding model. The isotropic displacement parameters of all hydrogen atoms were fixed to 1.2 times the atoms they are linked to (1.5 times for methyl groups). Unless otherwise indicated, all depictions of solid-state structures are displayed as 50% probability thermal ellipsoid plots. Further details on particular structures are noted in the X-Ray Diffraction Techniques section.

**SQUID Magnetometry.** Magnetic measurements were recorded using a Quantum Design MPMS-3 system. Samples used for magnetic characterization were prepared by carefully adding carefully weighed, finely crushed microcrystalline powder (ca. 25 mg) to the bottom of a low-paramagnetic impurity 500 MHz borosilicate NMR tube in an air-free, Argon-filled glovebox. An equal volume of n-eicosane was added to the tube (~30 mg); all weighing was performed using plastic anti-static spatulas. The NMR tube was then fitted with a gas-line adaptor, removed from the glovebox, and transferred to a Schlenk line. The tube was then flame sealed under vacuum, and the eicosane was melted using a 40-43 °C hot water bath. Upon cooling, the product-eicosane mixture formed a solid matrix. The sealed ampule was placed in a straw and suspended in the magnetometer. Dc magnetic susceptibility data were collected in the temperature range 1.8–300 K under applied fields of 0.1 and 0.5 T. Susceptibility data were corrected for the diamagnetic contribution of a blank sample consisting of eicosane, capsule and straw. The magnetic susceptibilities were adjusted for diamagnetic contributions using the constitutive corrections from Pascal's constants.<sup>11</sup> Dc susceptibility data and magnetization data were fitted using PHI.<sup>12</sup>

## Synthesis.

**(<sup>tb</sup>L)Fe<sub>3</sub>(py) (2).** *Method 1:* A solution of <sup>tb</sup>LH<sub>6</sub> (109 mg, 0.146 mmol) and Fe(N(SiMe<sub>3</sub>)<sub>2</sub>)<sub>2</sub>(py)<sub>2</sub> (234 mg, 0.438 mmol) in benzene (2 mL) was heated to 120 °C for 3 days. The reaction mixture was lyophilized and extracted with diethyl ether; the remaining solid was identified as pure (<sup>tb</sup>L)Fe<sub>3</sub>(py) following extraction in benzene, filtration through a glass wool plug, and lyophilization (29.2 mg). The diethyl ether fraction was filtered through a glass wool plug and concentrated, and crystallization was achieved at –33 °C to yield brown crystalline product (58.1 mg). The two fractions resulted in an overall yield of 87.3 mg of product (61%).

*Method 2:* To (<sup>tb</sup>L)Fe<sub>3</sub>(thf) (115 mg, 0.117 mmol) in benzene (2 mL) was added a solution of pyridine (14.4 mg, 0.182 mmol) in benzene (2 mL). The reaction mixture was stirred at room temperature for 1 h, then concentrated *in vacuo* and crystallized from concentrated diethyl ether. Crystallization at –33 °C yielded 86.4 mg of product (74%) <sup>1</sup>H NMR (500 MHz, C<sub>6</sub>D<sub>6</sub>):  $\delta$  222.5, 113.7, 66.8, 55.7, 54.1, 49.3, 46.0, 43.9, 31.4, 26.2, 23.2, 3.3, 1.1, –1.1, –5.9, –17.0, –23.0, –53.0, –77.9, –95.5, –105.1, –197.9, –208.1. <sup>57</sup>Fe Mössbauer (90 K) ( $\delta$ ,  $|\Delta E_Q|$  (mm/s)): component 1 (38%): 0.33, 1.84 ( $\Gamma$  = 0.18 mm/s); component 2 (28%): 0.55, 1.76 ( $\Gamma$  = 0.16 mm/s), component 3 (33%): 0.74, 1.39 ( $\Gamma$  = 0.29 mm/s). Calc. for C<sub>47</sub>H<sub>71</sub>Fe<sub>3</sub>N<sub>7</sub>Si<sub>3</sub>: C, 57.26; H, 7.26; N, 9.94. Found: C, 57.61; H, 7.21; N, 10.09.

**[Na(thf)][(t<sup>bs</sup>L)Fe<sub>2</sub>Na(thf)] (4).** To a frozen solution of NaN(SiMe<sub>3</sub>)<sub>2</sub> (166.7 mg, 0.909 mmol) in THF (3 mL) was added (t<sup>bs</sup>LH<sub>2</sub>)Fe<sub>2</sub> (387.8 mg, 0.454 mmol) in THF (3 mL). The reaction mixture was frozen to keep the layers separate, then thawed to allow slow diffusion of the layers, and stirred at room temperature over the course of 2 h. The volatile components of the reaction mixture were removed *in vacuo*, then washed with hexanes. The remaining solid was collected with THF and filtered through a glass wool plug. Removal of the volatile components from the filtrate *in vacuo* yielded 467.7 mg of dark brown solid (99%). It is noted that crystallization of **4** from ether solution at -33 °C yields a composition differing in the coordinated solvent; refer to the X-Ray Diffraction Techniques section. <sup>1</sup>H NMR (500 MHz, THF-*d*<sub>8</sub>): δ 136.5, 89.8, 77.8, 48.7, 45.0, 41.3, 37.4, 31.2, 24.8, 23.8, 14.1, 7.3, 1.3, 0.9, -1.3, -3.6, -5.5, -9.1, -11.2, -15.3, -19.8, -34.6, -38.5, -39.2, -43.5, -44.2, -65.2, -73.4. <sup>57</sup>Fe Mössbauer (90 K) (δ, |ΔE<sub>Q</sub>| (mm/s)): component 1 (50%): 0.54, 0.87 (Γ = 0.16 mm/s); component 2 (50%): 0.47, 1.51 (Γ = 0.16 mm/s). Calc. for C<sub>50</sub>H<sub>82</sub>Fe<sub>2</sub>N<sub>6</sub>Na<sub>2</sub>O<sub>2</sub>Si<sub>3</sub>: C, 57.68; H, 7.94; N, 8.07. Found: C, 57.68; H, 7.90; N, 8.20.

**(t<sup>bs</sup>L)Fe<sub>2</sub>Zn(thf) (5).** To ZnCl<sub>2</sub> (19.2 mg, 0.14 mmol) frozen in THF (3 mL) was added (t<sup>bs</sup>L)Fe<sub>2</sub>Na<sub>2</sub>(thf)<sub>2</sub> (**4**) (146.3 mg, 0.14 mmol) in THF (3 mL). The reaction mixture was frozen to keep the layers separate, then thawed to allow slow diffusion of the layers, and stirred at room temperature overnight. The volatile components of the reaction mixture were removed *in vacuo*, and the resulting dark brown solid was extracted in hexanes with drops of benzene. The dark brown extracts were filtered through a Celite plug, and maintenance of the filtrate at -33 °C yielded 117 mg of dark brown crystalline product (84%). <sup>1</sup>H NMR (600 MHz, C<sub>6</sub>D<sub>6</sub>): δ 143.0, 108.7, 45.3, 41.0, 27.4, 25.6, 23.7, 22.6, 19.1, 17.0, 14.1, 9.5, 8.3, 6.0, 5.4, 4.1, 3.8, 3.1, 1.8, 1.7, 1.6, 1.5, 1.2, 1.0, 1.0, 0.9, -0.6, -1.1, -2.0, -2.2, -5.4, -8.5, -10.4, -11.2, -15.4, -17.8, -23.8, -28.1, -41.4, -42.0, -54.3. <sup>57</sup>Fe Mössbauer (90 K) (δ, |ΔE<sub>Q</sub>| (mm/s)): component 1 (50%): 0.6, 1.83; component 2 (50%): 0.84, 1.55. Calc. for C<sub>46</sub>H<sub>74</sub>Fe<sub>2</sub>N<sub>6</sub>Si<sub>3</sub>Zn: C, 55.90; H, 7.55; N, 8.50. Found: C, 56.30; H, 7.89; N, 8.29. Fe/Zn ratio by XRF: 2.2:1.

**(t<sup>bs</sup>L)Fe<sub>2</sub>Zn(py) (6).** To ZnCl<sub>2</sub>(py) (30.8 mg, 0.10 mmol) frozen in benzene (2 mL) was added (t<sup>bs</sup>L)Fe<sub>2</sub>Na<sub>2</sub>(thf)<sub>2</sub> (**4**) (99 mg, 0.095 mmol) in benzene (2 mL). The reaction mixture was frozen to keep the layers separate, then thawed to allow slow diffusion of the layers, and stirred at room temperature overnight. The volatile components of the reaction mixture were removed *in vacuo*, and the brown solids were extracted in diethyl ether. Filtration of the extracts through a Celite plug, and maintenance of the filtrate at -33 °C yielded 70.7 mg of dark brown crystalline product (75%). <sup>1</sup>H NMR (600 MHz, C<sub>6</sub>D<sub>6</sub>): δ 129.8, 97.8, 37.9, 27.3, 25.3, 24.9, 19.9, 19.7, 16.0, 14.2, 10.5, 4.3, 3.6, 3.3, 1.7, 1.6, 1.5, 1.2, 1.1, 1.0, 0.9, 0.1, -0.2, -0.6, -0.81, -0.84, -2.0, -3.0, -7.8, -10.9, -16.7, -21.9, -26.0, -36.0, -40.3. <sup>57</sup>Fe Mössbauer (90 K) (δ, |ΔE<sub>Q</sub>| (mm/s)): component 1 (50%): 0.61, 1.68; component 2 (50%): 0.79, 1.63. Calc. for C<sub>47</sub>H<sub>71</sub>Fe<sub>2</sub>N<sub>7</sub>Si<sub>3</sub>Zn: C, 56.71; H, 7.19; N, 9.85. Found: C, 57.09; H, 7.48; N, 9.78. Fe/Zn ratio by XRF: 2.1:1.

**[NBu<sub>4</sub>][(t<sup>bs</sup>L)Fe<sub>3</sub>(μ<sup>3</sup>-Cl)] (7).** To [NBu<sub>4</sub>][Cl] (28.2 mg, 0.101 mmol) frozen in THF (2 mL) was added (t<sup>bs</sup>L)Fe<sub>3</sub>(thf) (**1**) (99.6 mg, 0.102 mmol) in THF (2 mL). The reaction mixture was frozen to keep the layers separate, then thawed to allow slow diffusion of the layers, and stirred at room temperature over the course of 3 hours. The volatile components of the reaction mixture were removed *in vacuo*, and the brown solids were extracted in diethyl ether. Filtration of the extracts through a Celite plug, and maintenance of the filtrate at -33 °C yielded 100.9 mg of dark brown crystals (>99%). <sup>1</sup>H NMR (500 MHz, C<sub>6</sub>D<sub>6</sub>): δ 184.7, 56.9, 36.1, 32.7, 31.1, 7.3, 5.8, 3.4, 3.1, 1.6, 1.1, 1.0, 0.7, 0.2, -36.9, -41.4. <sup>57</sup>Fe Mössbauer (90 K) (δ, |ΔE<sub>Q</sub>| (mm/s)): 0.72, 1.31 (Γ = 0.24 mm/s). Calc. for C<sub>58</sub>H<sub>102</sub>ClFe<sub>3</sub>N<sub>7</sub>Si<sub>3</sub>: C, 58.80; H, 8.68; N, 8.28. Found: C, 58.98; H, 8.60; N, 8.66.

**[NBu<sub>4</sub>][(t<sup>bs</sup>L)Zn<sub>3</sub>(μ<sup>3</sup>-Cl)] (8).** In a thick-walled bomb flask with a Teflon screw cap, Zn(N(SiMe<sub>3</sub>)<sub>2</sub>)<sub>2</sub>(py) (464 mg, 1.0 mmol) and t<sup>bs</sup>LH<sub>6</sub> (247.7 mg, 0.33 mmol) were combined in benzene (10 mL). The reaction mixture was heated to 110 °C for five hours. This solution was added to a vial containing [NBu<sub>4</sub>][Cl] (93 mg, 0.33 mmol), and the resulting mixture stirred at room temperature overnight. A white precipitate formed which was filtered and washed with benzene. The remaining solid was extracted in THF and filtered through a glass wool plug. The filtrate was layered with hexanes, and maintenance of the mixture at -33 °C yielded 287.2 mg of white crystalline product (71% yield). <sup>1</sup>H NMR (500 MHz, THF-*d*<sub>8</sub>): δ 6.97 (d, 3H), 6.76 (d, 3H), 6.49 (t, 3H), 6.23 (t, 3H), 3.77 (br, s, 3H), 3.22 (t, 8H), 2.28 (d, 3H), 2.09 (d, 3H), 1.66 (m, 8H), 1.39 (m, 8H), 0.99 (t, 12H), 0.96 (s, 27H), -0.10 (s, 9H), -0.20 (s, 9H). Calc. for C<sub>58</sub>H<sub>102</sub>ClN<sub>7</sub>Si<sub>3</sub>Zn<sub>3</sub>: C, 57.41; H, 8.47; N, 8.08. Found: C, 57.25; H, 8.47; N, 7.87.

**[NBu<sub>4</sub>][(t<sup>bs</sup>L)Fe<sub>*n*</sub>Zn<sub>3-*n*</sub>(μ<sup>3</sup>-Cl)] (9; *n* = 1,2).** To [NBu<sub>4</sub>][Cl] (11 mg, 0.040 mmol) frozen in benzene (1 mL) was added (t<sup>bs</sup>L)Fe<sub>2</sub>Zn(thf) (**4**) (39.2 mg, 0.040 mmol) in benzene (1 mL). The reaction mixture was frozen to keep the layers separate, then thawed to allow slow diffusion of the layers, and stirred at room temperature overnight. The remaining solid was extracted in THF and filtered through a glass wool plug. The filtrate was layered with hexanes, and maintenance of the mixture at -33 °C yielded 33.6 mg of dark brown crystalline material (71%, based on recovery of mass). <sup>1</sup>H NMR (600 MHz, THF-*d*<sub>8</sub>): δ 223.7, 220.9, 210.4, 191.1, 189.5, 130.7, 124.1, 122.0, 57.8, 50.4, 50.5, 48.3, 47.5, 42.7, 41.8, 39.9, 36.3, 36.2, 35.9, 33.2, 32.0, 31.3, 26.7, 26.6, 25.5, 21.5, 21.2, 16.1, 15.7, 13.7, 11.6, 10.9, 7.3, 7.1, 5.6, 5.5, 5.0, 2.7, 1.9, 1.3, 1.1, 1.0, 0.9, 0.8, 0.2, 0.0, -0.7, -1.5, -2.2, -3.1, -3.6, -5.3, -6.3, -7.5, -9.7, -11.1, -28.0, -29.2, -33.4, -37.7, -42.2, -43.6 -59.7, -65.3. <sup>57</sup>Fe Mössbauer (90 K) (δ, |ΔE<sub>Q</sub>| (mm/s)): 0.77, 1.13. Fe/Zn ratio by XRF: 2.1:1.

**(t<sup>bs</sup>L)Fe<sub>2</sub>Zn(μ<sup>3</sup>-NPh) (11).** To phenyl azide (3.8 mg, 0.032 mmol) frozen in benzene (1 mL) was added a benzene solution (1 mL) of (t<sup>bs</sup>L)Fe<sub>2</sub>Zn(thf) (**5**) (30.1 mg, 0.030 mmol). The reaction mixture was frozen to keep the layers separate, then thawed to allow slow diffusion of the layers, and stirred at room temperature over the course of 1 h. The reaction mixture was lyophilized to yield 28.6 mg of dark brown powder, which represented a mixture of (t<sup>bs</sup>L)Fe<sub>3</sub>(μ<sup>3</sup>-NPh) and (t<sup>bs</sup>L)Fe<sub>2</sub>Zn(μ<sup>3</sup>-NPh) (95% mass recovery). Crystals suitable for X-ray diffraction were obtained from a saturated hexanes solution of **11** at -33 °C. Crude <sup>57</sup>Fe Mössbauer (90 K) (δ, |ΔE<sub>Q</sub>| (mm/s)): 0.28, 2.31.

**(t<sup>bs</sup>L)Fe<sub>2</sub>Zn(μ<sup>3</sup>-NPh)(py) (12).** To phenyl azide (5.9 mg, 0.050 mmol) frozen in benzene (1 mL) was added (t<sup>bs</sup>L)Fe<sub>2</sub>Zn(py) (**6**) (41.5 mg, 0.042 mmol) in benzene (1 mL). The reaction mixture was frozen to keep the layers separate, then thawed to allow slow diffusion of the layers, and stirred at room temperature over the course of 1 hour. The reaction mixture was lyophilized, and then extracted in hexanes. Following filtration of the hexanes extracts through a glass wool plug, maintenance of the filtrate at -33 °C yielded 26.4 mg of dark brown crystalline product (58% yield). <sup>1</sup>H NMR (500 MHz, C<sub>6</sub>D<sub>6</sub>): δ 176.4, 110.7, 74.8, 54.6, 27.1, 25.6, 22.7, 21.3, 16.2, 14.5, 11.9, 9.7, 9.1, 8.5, 8.2, 7.8, 6.7, 4.4, 3.6, 2.5, 1.8, 1.4, 1.2, 1.0, 0.9, 0.3, -0.2, -1.9, -2.8, -3.6, -5.4, -7.4, -8.7, -14.6, -16.9, -21.6, -23.8. <sup>57</sup>Fe Mössbauer (90 K) (δ, |ΔE<sub>Q</sub>| (mm/s)): component 1 (51%): 0.33, 1.80; component 2 (49%): 0.35, 2.76. Calc. for C<sub>53</sub>H<sub>76</sub>Fe<sub>2</sub>N<sub>8</sub>Si<sub>3</sub>Zn: C, 58.59; H, 7.05; N, 10.31. Found: C, 58.40; H, 6.99; N, 10.33. Fe/Zn ratio by XRF: 2.1:1.

**(t<sup>bs</sup>L)Fe<sub>3</sub>(μ<sup>3</sup>-N(3,5-C<sub>6</sub>H<sub>3</sub>(CF<sub>3</sub>)<sub>2</sub>)) (13).** To a frozen solution of 3,5-(CF<sub>3</sub>)<sub>2</sub>C<sub>6</sub>H<sub>3</sub>N<sub>3</sub> (27.6 mg, 0.11 mmol) in benzene (2 mL) was added (t<sup>bs</sup>L)Fe<sub>3</sub>(thf) (**1**) (100.1 mg, 0.10 mmol) in benzene (2 mL). The reaction mixture was frozen to keep the layers separate, then thawed to allow slow diffusion of the layers, and stirred at room temperature over the course of 1 h. The reaction mixture was

lyophilized and washed with cold pentane. Crystals were obtained upon cooling of the pentane wash to  $-33\text{ }^{\circ}\text{C}$ . The remaining solid extracted in hexanes and filtered through a glass wool plug. Maintenance of the hexanes filtrate at  $-33\text{ }^{\circ}\text{C}$  yielded a second crystalline crop. Crystals harvested from the two fractions gave an overall yield of 61.8 mg of product (53% yield).  $^1\text{H}$  NMR (500 MHz,  $\text{C}_6\text{D}_6$ ):  $\delta$  194.7, 60.1, 9.8, 8.0, 5.6, 3.0, 2.5, 1.9,  $-5.1$ ,  $-5.5$ ,  $-8.4$ ,  $-21.7$ .  $^{19}\text{F}$  NMR (500 MHz,  $\text{C}_6\text{D}_6$ ):  $\delta$   $-69.4$ .  $^{57}\text{Fe}$  Mössbauer (90 K) ( $\delta$ ,  $|\Delta E_Q|$ ) (mm/s): component 1 (33%): 0.37, 1.8; component 2 (33%): 0.38, 1.13; component 3 (33%): 0.45, 2.61. Calc. for  $\text{C}_{50}\text{H}_{69}\text{F}_6\text{Fe}_3\text{N}_7\text{Si}_3$ : C, 52.96; H, 6.13; N, 8.65. Found: C, 53.30; H, 6.28; N, 8.28.

**$(^{\text{tbs}}\text{L})\text{Fe}_2\text{Zn}(\mu^3\text{-N}(3,5\text{-}(\text{CF}_3)_2\text{C}_6\text{H}_3))$** . To a frozen solution of  $3,5\text{-}(\text{CF}_3)_2\text{C}_6\text{H}_3\text{N}_3$  (5.3 mg, 0.028 mmol) in benzene (1 mL) was added a benzene solution (1 mL) of  $(^{\text{tbs}}\text{L})\text{Fe}_2\text{Zn}(\text{thf})$  (**5**) (27.1 mg, 0.027 mmol). The reaction mixture was frozen to keep the layers separate, then thawed to allow slow diffusion of the layers, and stirred at room temperature over the course of 1 h. The reaction mixture was lyophilized to yield 27.6 mg of dark brown powder, which represented a mixture of  $(^{\text{tbs}}\text{L})\text{Fe}_3(\mu^3\text{-N}(3,5\text{-}(\text{CF}_3)_2\text{C}_6\text{H}_3))$  and  $(^{\text{tbs}}\text{L})\text{Fe}_2\text{Zn}(\mu^3\text{-N}(3,5\text{-}(\text{CF}_3)_2\text{C}_6\text{H}_3))$  (86% mass recovery).

**$(^{\text{tbs}}\text{L})\text{Fe}_2\text{Zn}(\mu^3\text{-N}(3,5\text{-}(\text{CF}_3)_2\text{C}_6\text{H}_3))(\text{py})$  (**14**)**. To a frozen solution of  $3,5\text{-}(\text{CF}_3)_2\text{C}_6\text{H}_3\text{N}_3$  (12 mg, 0.047 mmol) in benzene (1 mL) was added crystalline **5** (47.7 mg, 0.048 mmol) in benzene (1 mL). The reaction mixture was frozen to keep the layers separate, then thawed to allow slow diffusion of the layers, and stirred at room temperature over the course of 1 h. The volatile components of the reaction mixture were removed *in vacuo*, and the resulting solid was extracted in hexanes with drops of benzene. The dark brown extracts were filtered through a Celite plug, and maintenance of the filtrate at  $-33\text{ }^{\circ}\text{C}$  yielded 30 mg of dark brown crystalline product (51%).  $^1\text{H}$  NMR (500 MHz,  $\text{C}_6\text{D}_6$ ):  $\delta$  216.0, 197.4, 135.1, 64.1, 60.6, 50.3, 32.2, 31.3, 25.8, 24.8, 20.9, 18.8, 13.3, 10.8, 8.8, 6.7, 5.4, 2.4, 1.2, 0.9,  $-0.7$ ,  $-1.9$ ,  $-3.3$ ,  $-5.3$ ,  $-9.1$ ,  $-11.1$ ,  $-14.9$ ,  $-15.8$ ,  $-20.0$ ,  $-21.6$ ,  $-23.5$ ,  $-24.4$ ,  $-43.5$ ,  $-45.4$ ,  $-48.6$ .  $^{19}\text{F}$  NMR (500 MHz,  $\text{C}_6\text{D}_6$ ):  $\delta$   $-68.5$ ,  $-71.2$ .  $^{57}\text{Fe}$  Mössbauer (90 K) ( $\delta$ ,  $|\Delta E_Q|$ ) (mm/s): component 1 (55%): 0.33, 1.76; component 2 (45%): 0.40, 2.92. Calc. for  $\text{C}_{55}\text{H}_{74}\text{F}_6\text{Fe}_2\text{N}_8\text{Si}_3\text{Zn}$ : C, 54.03; H, 6.10; N, 9.17. Found: C, 54.21; H, 5.79; N, 8.85. Fe/Zn ratio by XRF: 2.1:1.

**$[\text{CoCp}^*_2][(^{\text{tbs}}\text{L})\text{Fe}_3(\mu^3\text{-N}(3,5\text{-}(\text{CF}_3)_2\text{C}_6\text{H}_3))]$  (**15**)**. To  $\text{CoCp}^*_2$  (14.3 mg, 0.043 mmol) frozen in THF (1 mL) was added  $(^{\text{tbs}}\text{L})\text{Fe}_3(\mu^3\text{-N}(3,5\text{-}(\text{CF}_3)_2\text{C}_6\text{H}_3))$  (**13**) (49.1 mg, 0.043 mmol) in THF (1 mL). The reaction mixture was frozen to keep the layers separate, then thawed to allow slow diffusion of the layers. The reaction mixture was stirred at room temperature, and the volatile components were removed *in vacuo* 1 h after thawing. The resulting solid was extracted in THF and filtered through a glass wool plug. Diffusion of hexanes into the filtrate solution at  $-33\text{ }^{\circ}\text{C}$  yielded 44.8 mg of dark brown crystalline product (71%).  $^1\text{H}$  NMR (500 MHz,  $\text{THF-}d_8$ ):  $\delta$  56.1, 12.1, 9.7, 7.3, 7.0, 6.8, 5.8, 5.4, 2.2, 1.3, 1.0, 0.9, 0.4,  $-3.8$ ,  $-10.1$ ,  $-29.4$ ,  $-55.9$ ,  $-70.9$ .  $^{19}\text{F}$  NMR (500 MHz,  $\text{THF-}d_8$ ):  $\delta$   $-85.9$ .  $^{57}\text{Fe}$  Mössbauer (90 K) ( $\delta$ ,  $|\Delta E_Q|$ ) (mm/s): component 1 (67%): 0.49, 1.82 ( $\Gamma = 0.35$  mm/s); component 2 (33%): 0.59, 1.20 ( $\Gamma = 0.16$  mm/s). Calc. for  $\text{C}_{70}\text{H}_{99}\text{CoF}_6\text{Fe}_3\text{N}_7\text{Si}_3$ : C, 57.46; H, 6.82; N, 6.70. Found: C, 57.19; H, 6.87; N, 7.02.

**$[(2,2,2\text{-cryptand})\text{K}][(^{\text{tbs}}\text{L})\text{Fe}_2\text{Zn}(\mu^3\text{-N}(3,5\text{-}(\text{CF}_3)_2\text{C}_6\text{H}_3))]$  (**16**)**. To a frozen suspension of  $\text{KC}_8$  (3.8 mg, 0.028 mmol) in THF (1 mL) was added a solution of crystalline  $(^{\text{tbs}}\text{L})\text{Fe}_2\text{Zn}(\mu^3\text{-N}(3,5\text{-}(\text{CF}_3)_2\text{C}_6\text{H}_3))(\text{py})$  (**14**) (34.3 mg, 0.028 mmol) in THF (1 mL). The reaction mixture was frozen to keep the layers separate, then thawed to allow slow diffusion of the layers, and stirred at room temperature over the course of 1 h. The reaction mixture was filtered through Celite to a vial containing 2,2,2-cryptand (10.6 mg, 0.028 mmol), and the resulting mixture was stirred at room



temperature for 30 min. The volatile components of the reaction mixture were then removed *in vacuo*, and the resulting solid was extracted in diethyl ether. Filtration of the ethereal extracts, followed by maintenance of the filtrate at  $-33\text{ }^{\circ}\text{C}$  yielded 30 mg of dark brown crystalline product (69% yield).  $^1\text{H}$  NMR (500 MHz, THF- $d_8$ ):  $\delta$  237.7, 156.3, 126.9, 47.7, 45.9, 23.5, 20.8, 16.9, 14.8, 13.8, 10.3, 9.2, 7.0, 5.2, 2.6, 1.3, 0.9,  $-0.3$ ,  $-1.2$ ,  $-2.5$ ,  $-2.8$ ,  $-4.4$ ,  $-5.6$ ,  $-7.5$ ,  $-9.4$ ,  $-18.0$ ,  $-19.2$ ,  $-23.2$ ,  $-41.8$ ,  $-52.7$ .  $^{19}\text{F}$  NMR (500 MHz, THF- $d_8$ ):  $\delta$   $-79.4$ .  $^{57}\text{Fe}$  Mössbauer (90 K) ( $\delta$ ,  $|\Delta E_Q|$ ) (mm/s): component 1 (50%): 0.35, 1.73 ( $\Gamma = 0.29$  mm/s); component 2 (%): 0.59, 3.01 ( $\Gamma = 0.20$  mm/s). Calc. for  $\text{C}_{68}\text{H}_{105}\text{F}_6\text{Fe}_2\text{KN}_9\text{O}_6\text{Si}_3\text{Zn}$ : C, 52.39; H, 6.79; N, 8.09. Found: C, 52.24; H, 6.73; N, 8.51. Fe/Zn ratio by XRF: 1.9:1.

**Reaction of  $[\text{NBu}_4][(\text{tbsL})\text{Fe}_3(\mu^3\text{-Cl})]$  (7) and  $[\text{NBu}_4][(\text{tbsL})\text{Zn}_3(\mu^3\text{-Cl})]$  (8).** Crystalline  $[\text{NBu}_4][(\text{tbsL})\text{Fe}_3(\mu^3\text{-Cl})]$  (7) (10.1 mg, 0.00853 mmol) and  $[\text{NBu}_4][(\text{tbsL})\text{Zn}_3(\mu^3\text{-Cl})]$  (8) (10.3 mg, 0.00853 mmol) were separately dissolved in THF (0.2 mL) and combined in a J. Young NMR tube. Three 0.05 mL aliquots of THF were used to rinse the vials used in sample preparation, and the aliquots were added to the reaction mixture.  $^1\text{H}$  NMR spectra collected within 1 h of sample preparation and after 24 h were identical. The sample was then subjected to heating at  $40\text{ }^{\circ}\text{C}$  for 24 h and then at  $60\text{ }^{\circ}\text{C}$  for 24 h;  $^1\text{H}$  NMR spectra recorded after each heating period showed no change. Heating at  $80\text{ }^{\circ}\text{C}$  for 24 h resulted in formation of small quantities of the metal-atom redistribution product  $[\text{NBu}_4][(\text{tbsL})\text{Fe}_n\text{Zn}_{3-n}(\mu^3\text{-Cl})]$  (9). These  $^1\text{H}$  NMR spectra are presented in Figure S21.

**Reaction of  $(\text{tbsL})\text{Fe}_2\text{Zn}(\text{thf})$  (5) and  $[\text{NBu}_4][(\text{tbsL})\text{Fe}_3(\mu^3\text{-Cl})]$  (7).** Crystalline  $(\text{tbsL})\text{Fe}_2\text{Zn}(\text{thf})$  (5) (10.2 mg, 0.0103 mmol) and  $[\text{NBu}_4][(\text{tbsL})\text{Fe}_3(\mu^3\text{-Cl})]$  (7) (12.2 mg, 0.0103 mmol) were separately dissolved in THF/ $\text{C}_6\text{D}_6$  (25% v/v; 0.2 mL) and combined in a J. Young NMR tube. Three 0.05 mL aliquots of the solvent mixture were used to rinse the vials used in sample preparation, and the aliquots were added to the reaction mixture.  $^1\text{H}$  NMR spectra were recorded after 4 h and 24 h of maintenance at room temperature, and after heating at  $60\text{ }^{\circ}\text{C}$  for 24 h. These spectra indicate that the metal-atom redistribution product  $[\text{NBu}_4][(\text{tbsL})\text{Fe}_n\text{Zn}_{3-n}(\mu^3\text{-Cl})]$  (9) was generated rapidly at room temperature after 4 h, with 5 and 7 being no longer observable. No further change was observed after heating at  $60\text{ }^{\circ}\text{C}$  for 24 h. These  $^1\text{H}$  NMR spectra are presented in Figure S22.

**Reaction of  $(\text{tbsL})\text{Fe}_2\text{Zn}(\text{thf})$  (5) and  $[\text{NBu}_4][(\text{tbsL})\text{Zn}_3(\mu^3\text{-Cl})]$  (8).** Crystalline  $(\text{tbsL})\text{Fe}_2\text{Zn}(\text{thf})$  (5) (10.7 mg, 0.0108 mmol) and  $[\text{NBu}_4][(\text{tbsL})\text{Zn}_3(\mu^3\text{-Cl})]$  (8) (13.1 mg, 0.0108 mmol) were separately dissolved in THF/ $\text{C}_6\text{D}_6$  (25% v/v; 0.2 mL) and combined in a J. Young NMR tube. Three 0.05 mL aliquots of the solvent mixture were used to rinse the vials used in sample preparation, and the aliquots were added to the reaction mixture.  $^1\text{H}$  NMR spectra were recorded after 4 h and 24 h of maintenance at room temperature, and after heating at  $60\text{ }^{\circ}\text{C}$  for 24 h. These spectra indicate that the metal-atom redistribution product  $[\text{NBu}_4][(\text{tbsL})\text{Fe}_n\text{Zn}_{3-n}(\mu^3\text{-Cl})]$  (9) was generated slowly at room temperature, and the reaction mixture is predominantly composed of 5 and 8. At elevated temperatures, conversion to 9 is increased, but 5 and 8 persist in solution. These  $^1\text{H}$  NMR spectra are presented in Figure S23.

**Reaction of  $(\text{tbsL})\text{Fe}_2\text{Zn}(\text{thf})$  (5) with  $\text{FeCl}_2$ .** A suspension of  $\text{FeCl}_2$  (1.3 mg, 0.010 mmol) in THF (0.2 mL) was added to a solution of  $(\text{tbsL})\text{Fe}_2\text{Zn}(\text{thf})$  (5) (10.1 mg; 0.0102 mmol) in THF (0.2 mL). Three 0.05 mL aliquots of THF were used to rinse the vials used in sample preparation, and the aliquots were added to the reaction mixture.  $^1\text{H}$  NMR spectra were recorded after 4 h and 24 h of

maintenance at room temperature. These spectra indicate that metal-atom redistribution product  $[\text{NBu}_4][(\text{t}^{\text{bs}}\text{L})\text{Fe}_n\text{Zn}_{3-n}(\mu^3\text{-Cl})]$  (**9**) and tri-ferrous  $[\text{NBu}_4][(\text{t}^{\text{bs}}\text{L})\text{Fe}_3(\mu^3\text{-Cl})]$  **7** were generated at room temperature, although small quantities of **5** remain present. Several unidentified resonances attributed to paramagnetic species are also present in the  $^1\text{H}$  NMR spectra, and increase in intensity from 4 h to 24 h. Over this period, the color of the reaction mixture changed from dark brown to purple; this process was further accompanied by the deposition of a precipitate. These  $^1\text{H}$  NMR spectra are presented in Figure S24.

**Reaction of  $(\text{t}^{\text{bs}}\text{L})\text{Fe}_2\text{Zn}(\text{thf})$  (**5**) with  $\text{ZnCl}_2$ .** A solution of  $\text{ZnCl}_2$  (1.1 mg, 0.0081 mmol) in THF (0.2 mL) was added to a solution of  $(\text{t}^{\text{bs}}\text{L})\text{Fe}_2\text{Zn}(\text{thf})$  (**5**) (8.0 mg, 0.0081 mmol) in THF (0.2 mL). Three 0.05 mL aliquots of THF were used to rinse the vials used in sample preparation, and the aliquots were added to the reaction mixture.  $^1\text{H}$  NMR spectra were recorded after 4 h and 24 h of maintenance at room temperature. These spectra indicate that no metal-scrambling products were generated at room temperature, and **5** persisted in solution. However, the intensity of all resonances diminished noticeably after 24 h, and this was accompanied by a change in the color of the reaction mixture from dark brown to purple, although no precipitation was evident. These  $^1\text{H}$  NMR spectra are presented in Figure S25.

## Zero Field $^{57}\text{Fe}$ Mössbauer Spectroscopy

**Table S1.**  $^{57}\text{Fe}$  Mössbauer Parameters for Selected Complexes

| Compound                                                                                                                                           | $\delta$ (mms/s) | $ \Delta E_Q $ (mm/s) | %   |
|----------------------------------------------------------------------------------------------------------------------------------------------------|------------------|-----------------------|-----|
| $(^{\text{tbs}}\text{L})\text{Fe}_3(\text{thf})^1$ (1)                                                                                             | 0.37             | 1.99                  | 36  |
|                                                                                                                                                    | 0.46             | 1.52                  | 36  |
|                                                                                                                                                    | 0.88             | 1.29                  | 28  |
| $(^{\text{tbs}}\text{L})\text{Fe}_3(\text{py})$ (2)                                                                                                | 0.33             | 1.84                  | 38  |
|                                                                                                                                                    | 0.55             | 1.76                  | 28  |
|                                                                                                                                                    | 0.74             | 1.39                  | 33  |
| $[\text{Na}(\text{thf})][(^{\text{tbs}}\text{L})\text{Fe}_2\text{Na}(\text{thf})]$ (4)                                                             | 0.47             | 1.51                  | 50  |
|                                                                                                                                                    | 0.54             | 0.87                  | 50  |
| $(^{\text{tbs}}\text{L})\text{Fe}_2\text{Zn}(\text{thf})$ (5)                                                                                      | 0.60             | 1.83                  | 50  |
|                                                                                                                                                    | 0.84             | 1.55                  | 50  |
| $(^{\text{tbs}}\text{L})\text{Fe}_2\text{Zn}(\text{py})$ (6)                                                                                       | 0.61             | 1.68                  | 50  |
|                                                                                                                                                    | 0.79             | 1.63                  | 50  |
| $[\text{NBu}_4][(^{\text{tbs}}\text{L})\text{Fe}_3(\mu^3\text{-Cl})]$ (7)                                                                          | 0.72             | 1.31                  | 100 |
| $[\text{NBu}_4][(^{\text{tbs}}\text{L})\text{Fe}_n\text{Zn}_{3-n}(\mu^3\text{-Cl})]$ (9)                                                           | 0.77             | 1.13                  | 100 |
| $(^{\text{tbs}}\text{L})\text{Fe}_3(\mu^3\text{-NPh})^{1b}$ (10)                                                                                   | 0.42             | 1.97                  | 67  |
|                                                                                                                                                    | 0.42             | 1.09                  | 33  |
| $(^{\text{tbs}}\text{L})\text{Fe}_2\text{Zn}(\mu^3\text{-NPh})$ (11)                                                                               | 0.28             | 2.31                  | 100 |
| $(^{\text{tbs}}\text{L})\text{Fe}_2\text{Zn}(\mu^3\text{-NPh})(\text{py})$ (12)                                                                    | 0.33             | 1.80                  | 51  |
|                                                                                                                                                    | 0.35             | 2.76                  | 49  |
| $(^{\text{tbs}}\text{L})\text{Fe}_3(\mu^3\text{-N}(3,5\text{-}(\text{CF}_3)_2\text{C}_6\text{H}_3))$ (13)                                          | 0.37             | 1.80                  | 33  |
|                                                                                                                                                    | 0.38             | 1.13                  | 33  |
|                                                                                                                                                    | 0.45             | 2.61                  | 33  |
| $(^{\text{tbs}}\text{L})\text{Fe}_2\text{Zn}(\mu^3\text{-N}(3,5\text{-}(\text{CF}_3)_2\text{C}_6\text{H}_3))(\text{py})$ (14)                      | 0.33             | 1.76                  | 55  |
|                                                                                                                                                    | 0.40             | 2.92                  | 45  |
| $[\text{CoCp}^*_2][(^{\text{tbs}}\text{L})\text{Fe}_3(\mu^3\text{-N}(3,5\text{-}(\text{CF}_3)_2\text{C}_6\text{H}_3))]$ (15)                       | 0.49             | 1.82                  | 67  |
|                                                                                                                                                    | 0.59             | 1.20                  | 33  |
| $[2,2,2\text{-crypt}(\text{K})][(^{\text{tbs}}\text{L})\text{Fe}_2\text{Zn}(\mu^3\text{-N}(3,5\text{-}(\text{CF}_3)_2\text{C}_6\text{H}_3))]$ (16) | 0.35             | 1.73                  | 50  |
|                                                                                                                                                    | 0.59             | 3.01                  | 50  |

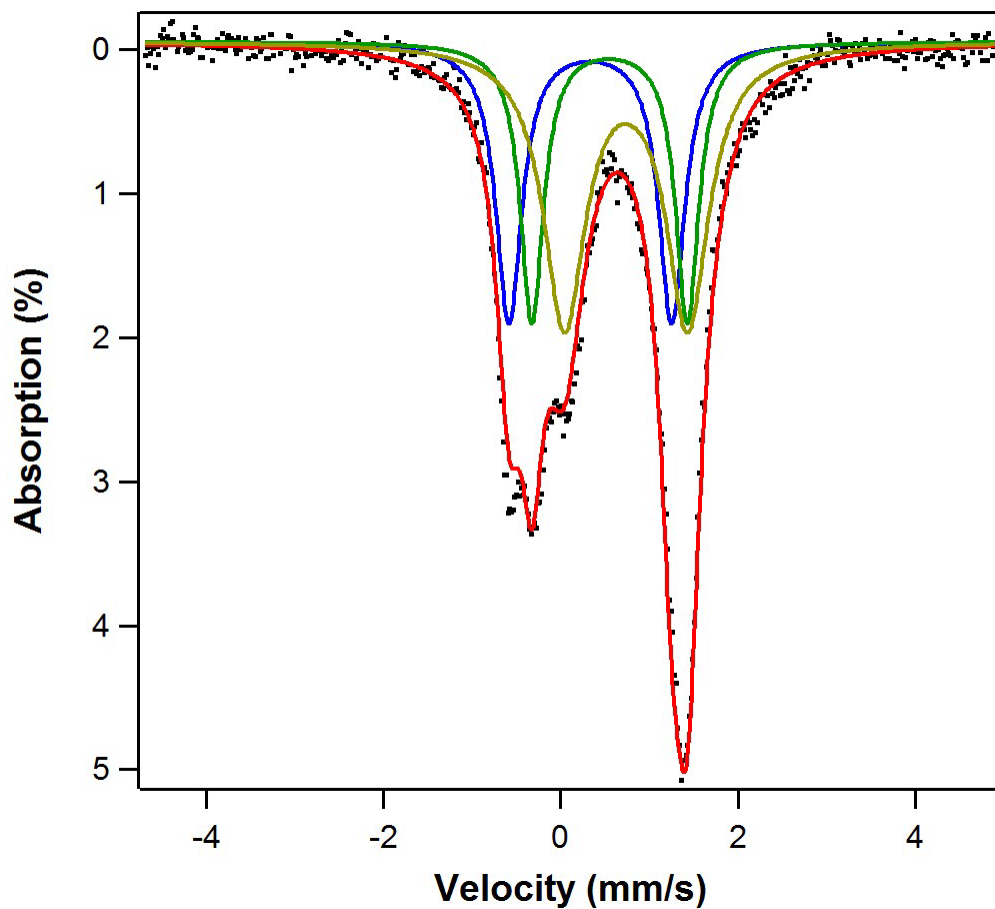

**Figure S1.** Zero-field  $^{57}\text{Fe}$  Mössbauer spectrum of  $(^{\text{tbsL}})\text{Fe}_3(\text{py})$  (**2**) collected at 90 K. Simulation yields the following parameters:  $\delta$ ,  $|\Delta E_Q|$  ( $\text{mm/s}$ ) component 1 (blue, 38%) 0.33, 1.84 ( $\Gamma = 0.18 \text{ mm/s}$ ); component 2 (green, 28%) 0.55, 1.76 ( $\Gamma = 0.16 \text{ mm/s}$ ); component 3 (yellow, 33%) 0.74, 1.39 ( $\Gamma = 0.29 \text{ mm/s}$ ).

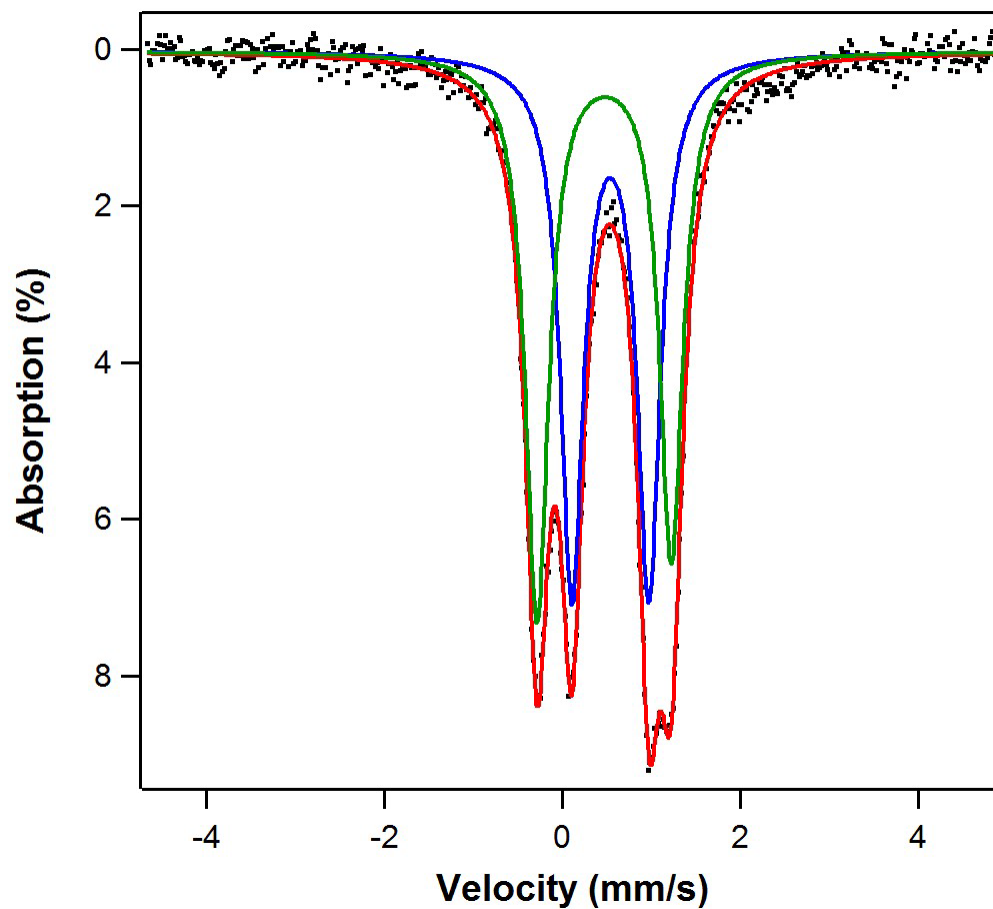

**Figure S2.** Zero-field  $^{57}\text{Fe}$  Mössbauer spectrum of  $[\text{Na}(\text{thf})][(\text{tbsL})\text{Fe}_2\text{Na}(\text{thf})]$  (**4**) collected at 90 K. Simulation yields the following parameters:  $\delta$ ,  $|\Delta E_Q|$  ( $\text{mm/s}$ ) component 1 (blue, 50%) 0.54, 0.87 ( $\Gamma = 0.16 \text{ mm/s}$ ); component 2 (green, 50%) 0.47, 1.51 ( $\Gamma = 0.16 \text{ mm/s}$ ).

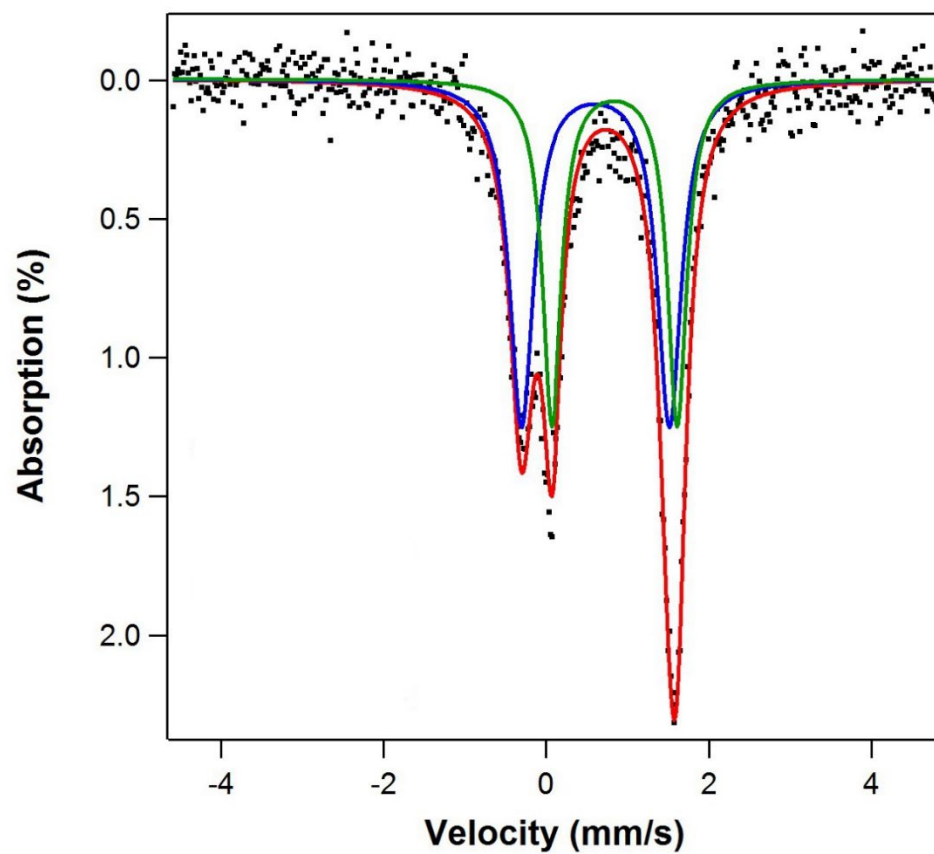

**Figure S3.** Zero-field  $^{57}\text{Fe}$  Mössbauer spectrum of  $(\text{tbsL})\text{Fe}_2\text{Zn}(\text{thf})$  (**5**) collected at 90 K. Simulation yields the following parameters:  $\delta$ ,  $|\Delta E_Q|$  ( $\text{mm/s}$ ) component 1 (blue, 50%) 0.60, 1.83 ( $\Gamma = 0.18 \text{ mm/s}$ ); component 2 (green, 50%) 0.84, 1.55 ( $\Gamma = 0.14 \text{ mm/s}$ ).

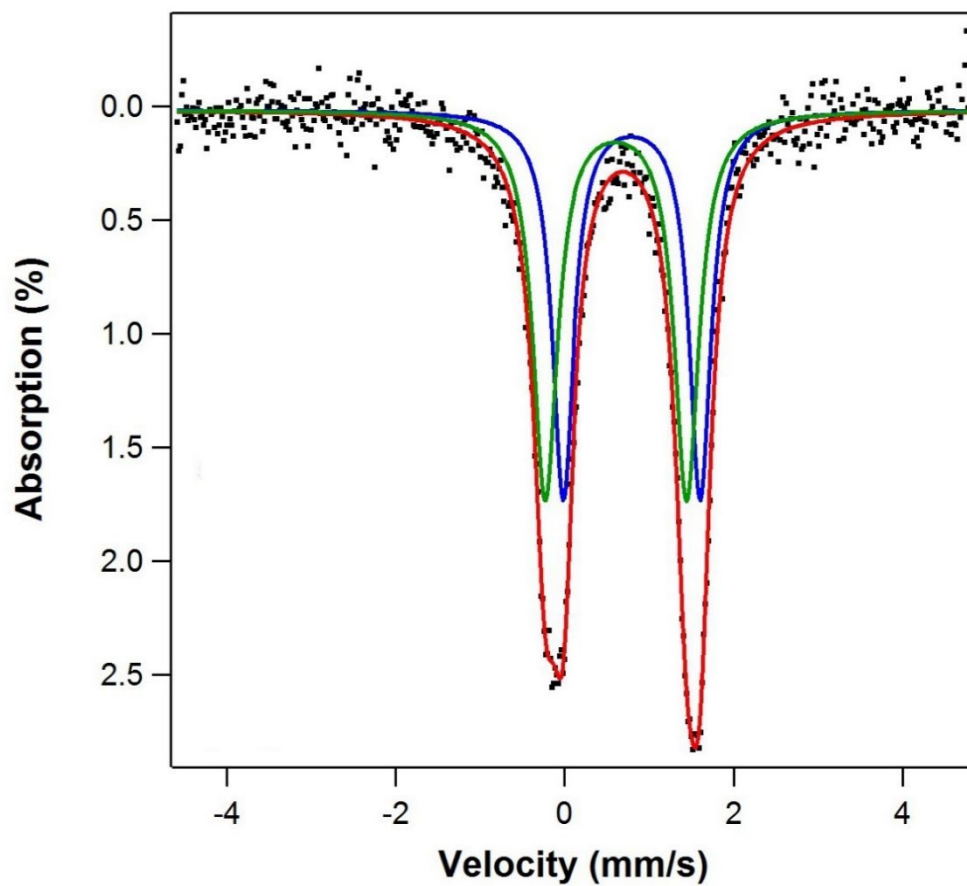

**Figure S4.** Zero-field  $^{57}\text{Fe}$  Mössbauer spectrum of  $(^{\text{tbsL}})\text{Fe}_2\text{Zn}(\text{py})$  (**6**) collected at 90 K. Simulation yields the following parameters:  $\delta$ ,  $|\Delta E_Q|$  ( $\text{mm/s}$ ) component 1 (blue, 50%) 0.79, 1.63 ( $\Gamma = 0.16 \text{ mm/s}$ ); component 2 (green, 50%) 0.61, 1.68 ( $\Gamma = 0.18 \text{ mm/s}$ ).

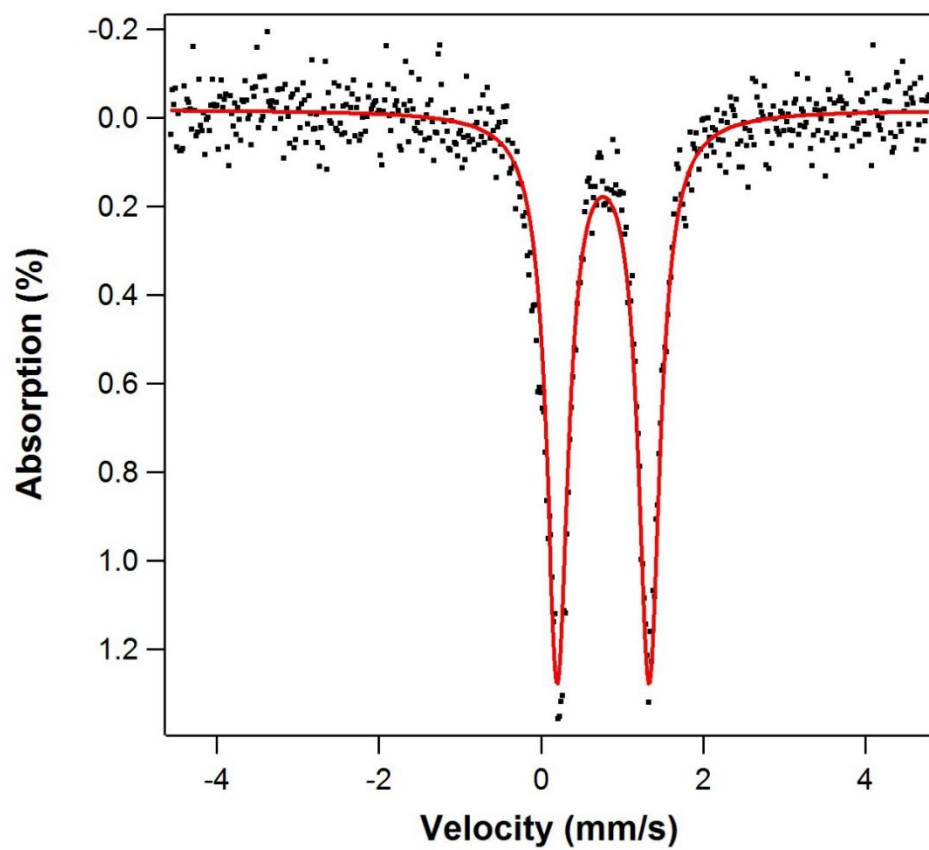

**Figure S5.** Zero-field  $^{57}\text{Fe}$  Mössbauer spectrum of  $[\text{NBu}_4][\{(\text{tbs})\text{L}\}\text{Fe}_n\text{Zn}_{3-n}(\mu^3\text{-Cl})]$  (**9**) collected at 90 K. Simulation yields the following parameters:  $\delta$ ,  $|\Delta E_Q|$  ( $\text{mm/s}$ ) 0.77, 1.13 ( $\Gamma = 0.16 \text{ mm/s}$ ).



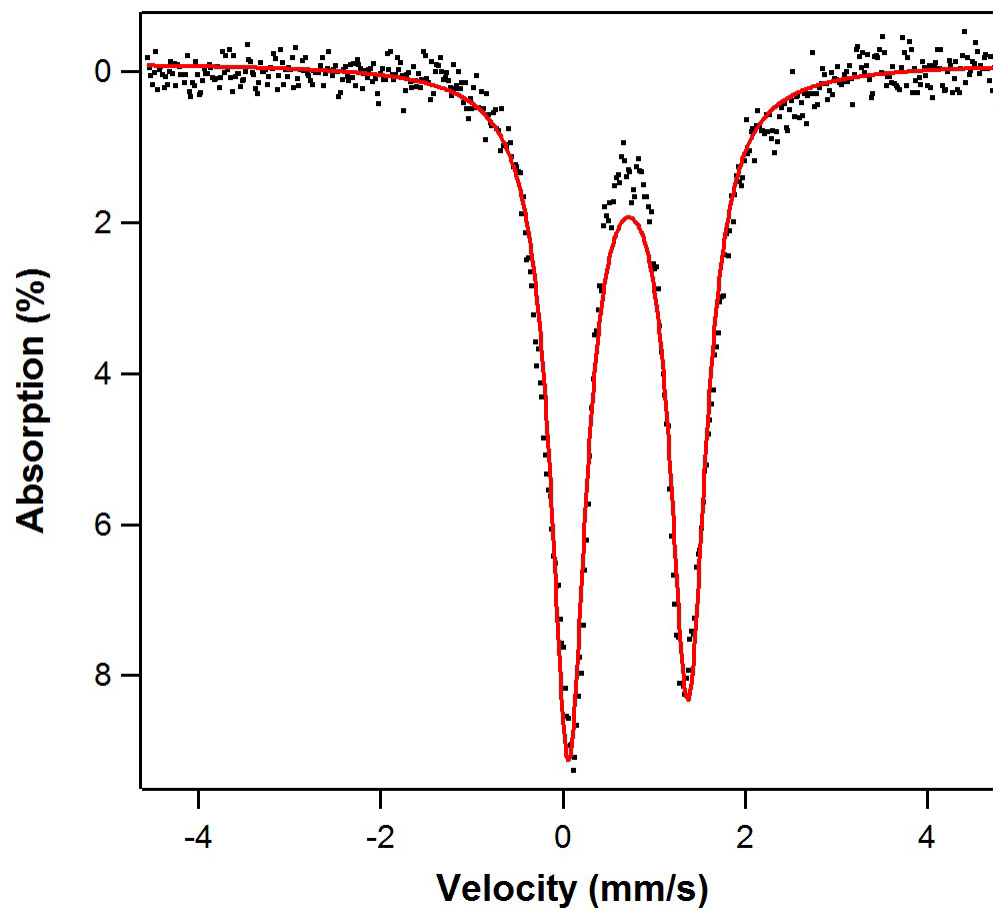

**Figure S6.** Zero-field  $^{57}\text{Fe}$  Mössbauer spectrum of  $[\text{NBu}_4][[(\text{tb}^{\text{SL}})\text{Fe}_3(\mu^3\text{-Cl})]$  (**7**) collected at 90 K. Simulation yields the following parameters:  $\delta$ ,  $|\Delta E_Q|$  ( $\text{mm/s}$ ) 0.72, 1.31 ( $\Gamma = 0.24 \text{ mm/s}$ ).

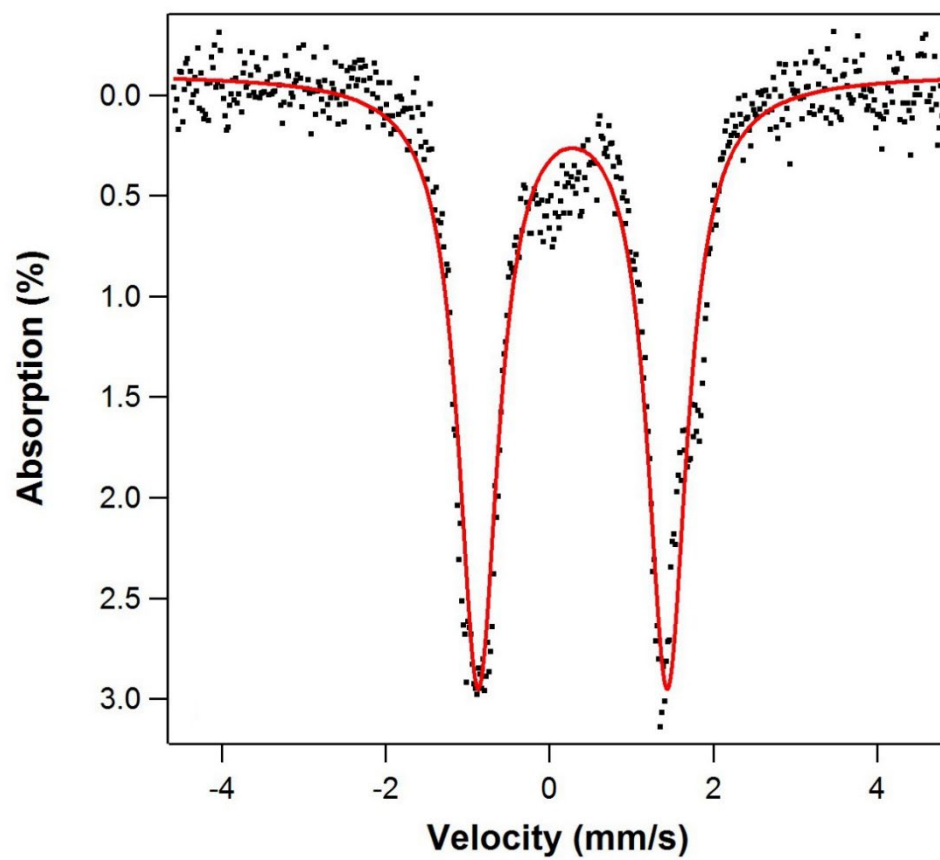

**Figure S7.** Zero-field  $^{57}\text{Fe}$  Mössbauer spectrum of crude  $(^{tbSL})\text{Fe}_2\text{Zn}(\mu^3\text{-NPh})$  (**11**) collected at 90 K. Simulation yields the following parameters:  $\delta$ ,  $|\Delta E_Q|$  ( $\text{mm/s}$ ) 0.28, 2.31 ( $\Gamma = 0.30 \text{ mm/s}$ ).

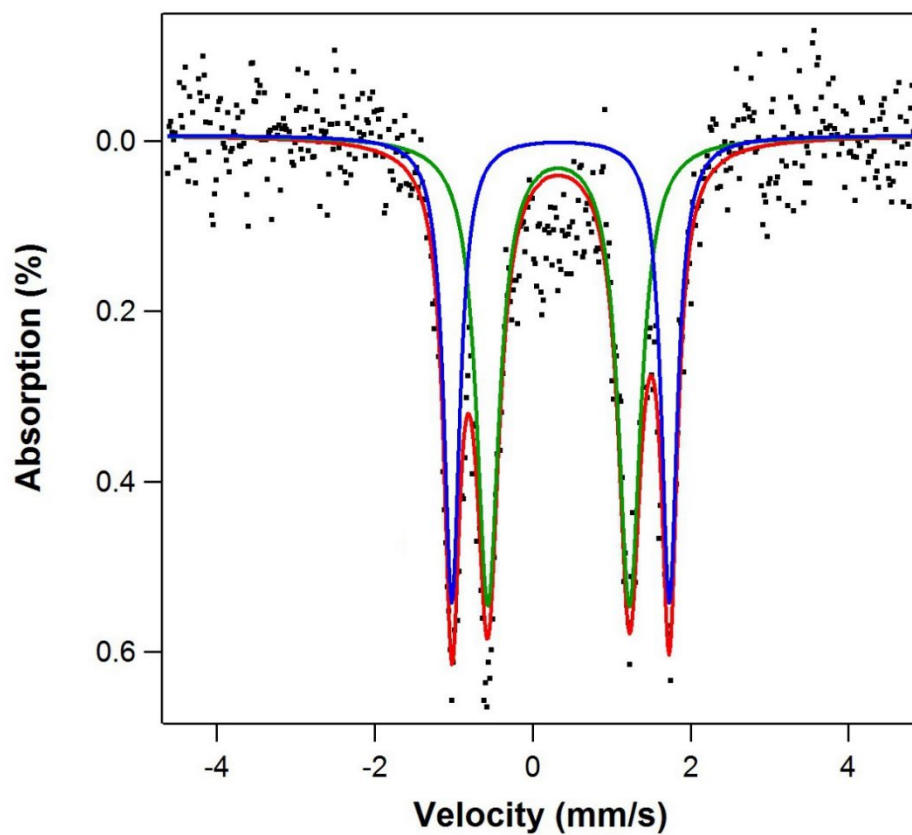

**Figure S8.** Zero-field  $^{57}\text{Fe}$  Mössbauer Spectrum of  $(\text{tbsL})\text{Fe}_2\text{Zn}(\mu^3\text{-NPh})(\text{py})$  (**12**) collected at 90 K. Simulation yields the following parameters:  $\delta$ ,  $|\Delta E_Q|$  ( $\text{mm/s}$ ) component 1 (blue, 49%) 0.35, 2.76 ( $\Gamma = 0.12 \text{ mm/s}$ ); component 2 (green, 51%) 0.33, 1.80 ( $\Gamma = 0.17 \text{ mm/s}$ ).

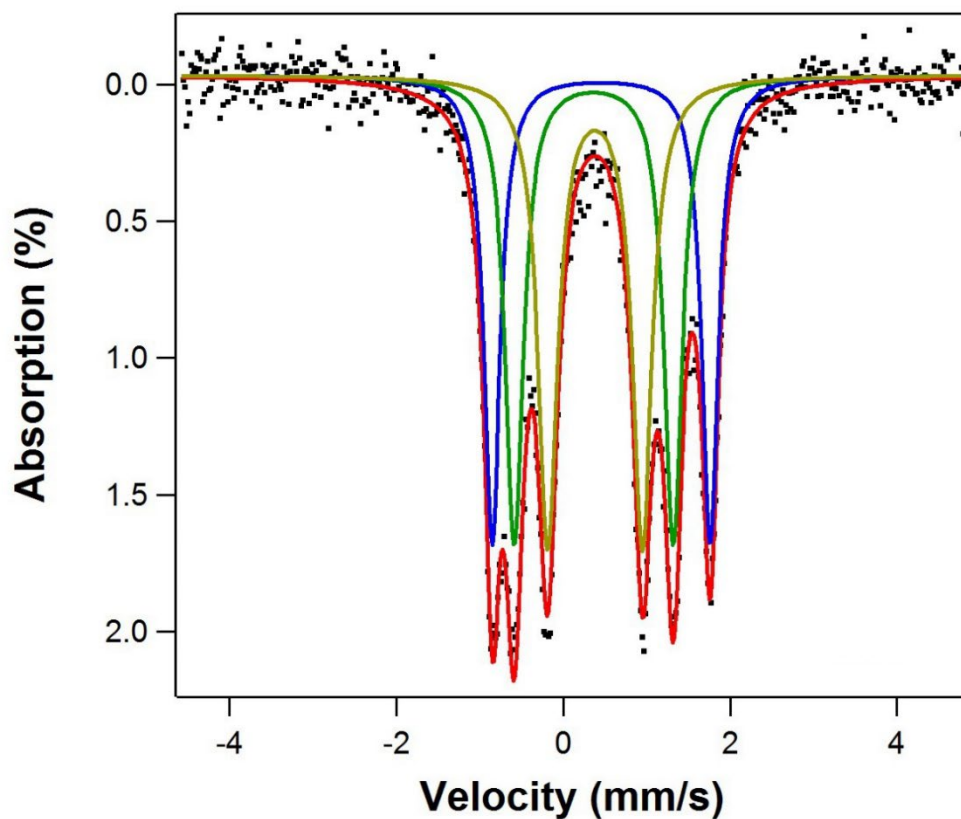

**Figure S9.** Zero-field  $^{57}\text{Fe}$  Mössbauer Spectrum of  $(\text{tbsL})\text{Fe}_3(\mu^3\text{-N}(3,5\text{-(CF}_3)_2\text{C}_6\text{H}_3))$  (**13**) collected at 90 K. Simulation yields the following parameters:  $\delta$ ,  $|\Delta E_Q|$  ( $\text{mm/s}$ ) component 1 (blue, 33%) 0.45, 2.61 ( $\Gamma = 0.12 \text{ mm/s}$ ); component 2 (green, 33%) 0.37, 1.80 ( $\Gamma = 0.13 \text{ mm/s}$ ); component 3 (yellow, 34%) 0.38, 1.13 ( $\Gamma = 0.14 \text{ mm/s}$ ).

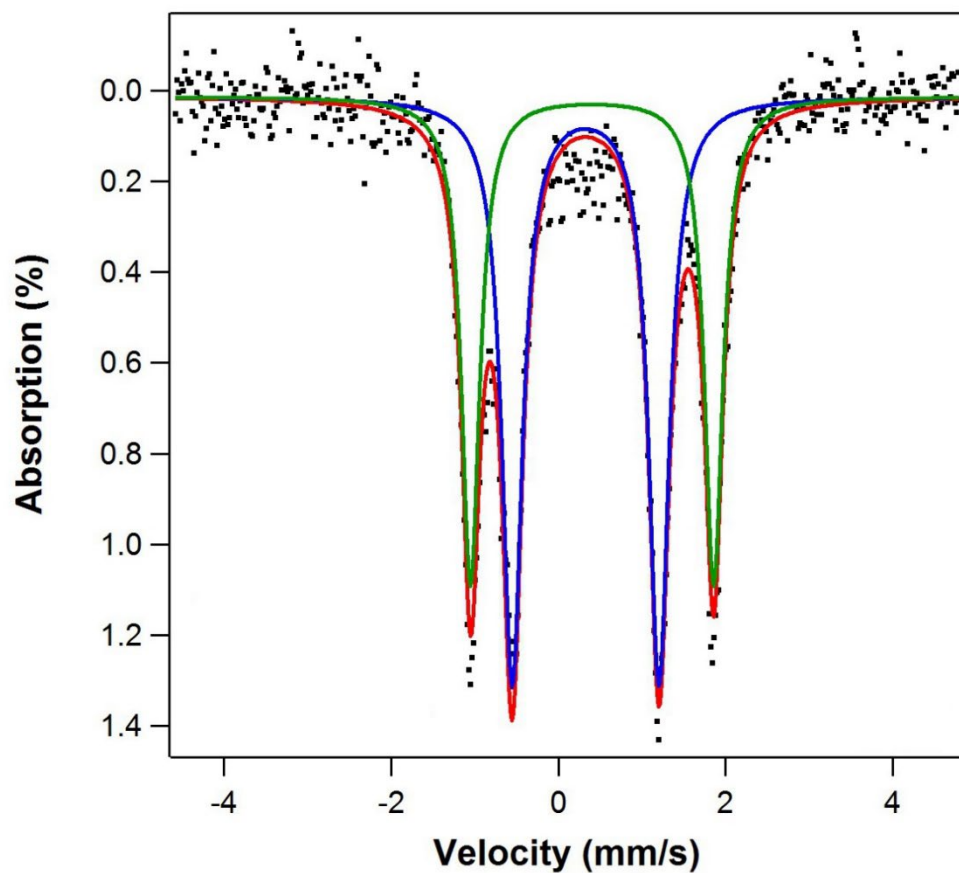

**Figure S10.** Zero-field  $^{57}\text{Fe}$  Mössbauer Spectrum of  $(^{\text{tbsL}})\text{Fe}_2\text{Zn}(\mu^3\text{-N}(3,5\text{-}(\text{CF}_3)_2\text{C}_6\text{H}_3))(\text{py})$  (**14**) collected at 90 K. Simulation yields the following parameters:  $\delta$ ,  $|\Delta E_Q|$  ( $\text{mm/s}$ ) component 1 (green, 46%) 0.33, 1.76 ( $\Gamma = 0.15 \text{ mm/s}$ ); component 2 (blue, 54%) 0.40, 2.92 ( $\Gamma = 0.13 \text{ mm/s}$ ).

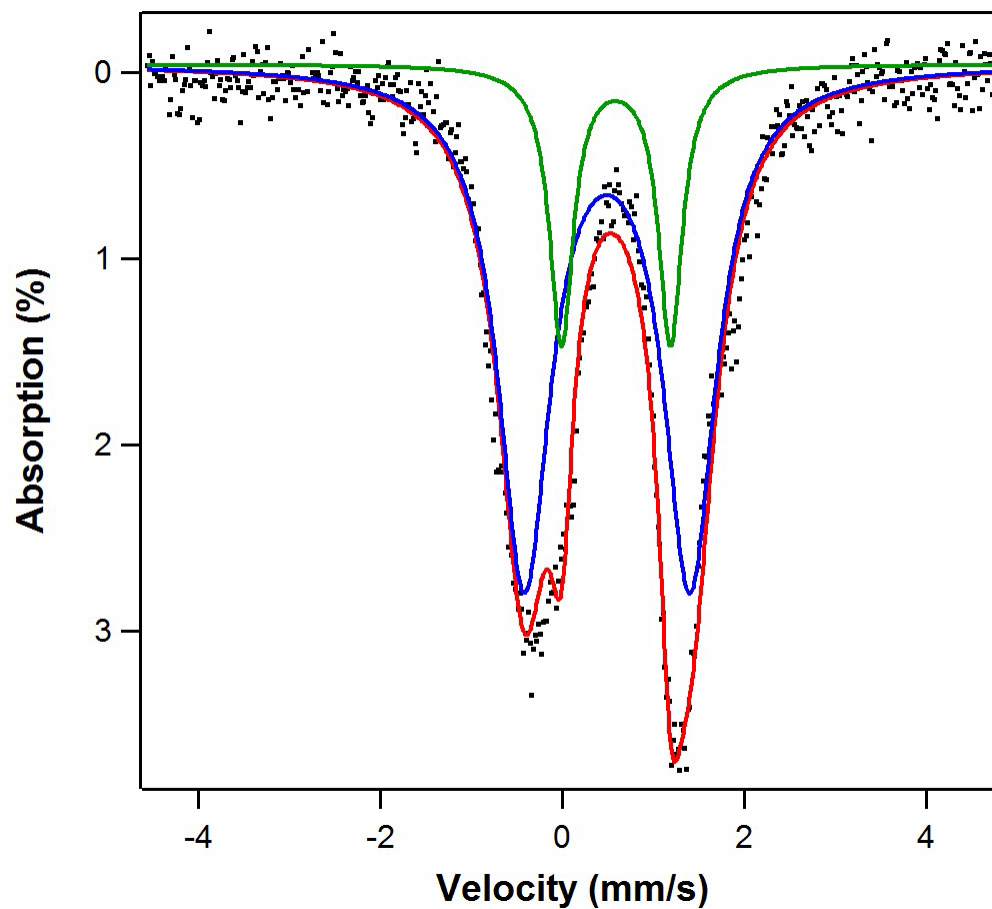

**Figure S11.** Zero-field  $^{57}\text{Fe}$  Mössbauer Spectrum of  $[\text{CoCp}^*_2][(\text{tbsL})\text{Fe}_3(\mu^3\text{-N}(3,5\text{-}(\text{CF}_3)_2\text{C}_6\text{H}_3))]$  (**15**) collected at 90 K. Simulation yields the following parameters:  $\delta$ ,  $|\Delta E_Q|$  ( $\text{mm/s}$ ) component 1 (blue, 67%) 0.49, 1.82 ( $\Gamma = 0.35 \text{ mm/s}$ ); component 2 (green, 33%) 0.59, 1.20 ( $\Gamma = 0.16 \text{ mm/s}$ ).

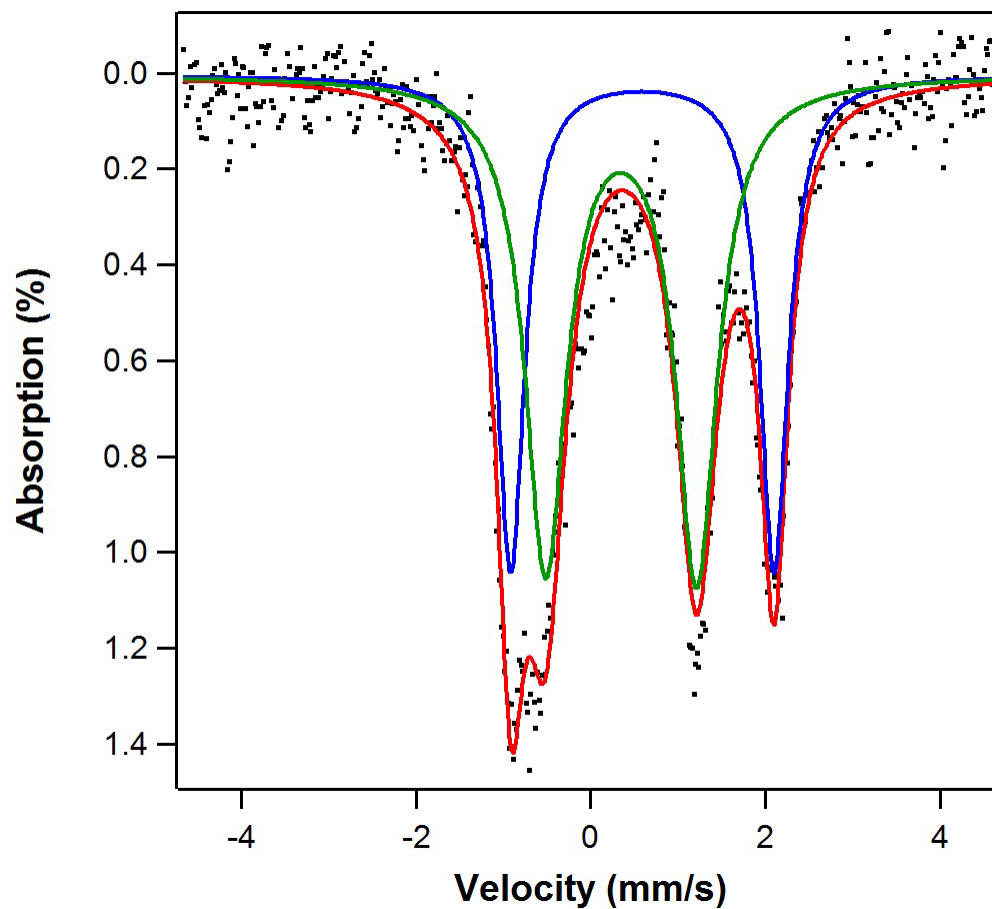

**Figure S12.** Zero-field  $^{57}\text{Fe}$  Mössbauer Spectrum of  $[2,2,2\text{-cryptand}(\text{K})][(\text{tbsL})\text{Fe}_2\text{Zn}(\mu^3\text{-N}(3,5\text{-}(\text{CF}_3)_2\text{C}_6\text{H}_3))]$  (**16**) collected at 90 K. Simulation yields the following parameters:  $\delta$ ,  $|\Delta E_Q|$  ( $\text{mm/s}$ ) component 1 (green, 50%) 0.35, 1.73 ( $\Gamma = 0.29 \text{ mm/s}$ ); component 2 (blue, 50%) 0.59, 3.01 ( $\Gamma = 0.20 \text{ mm/s}$ ).

## X-Ray Fluorescence Spectroscopy

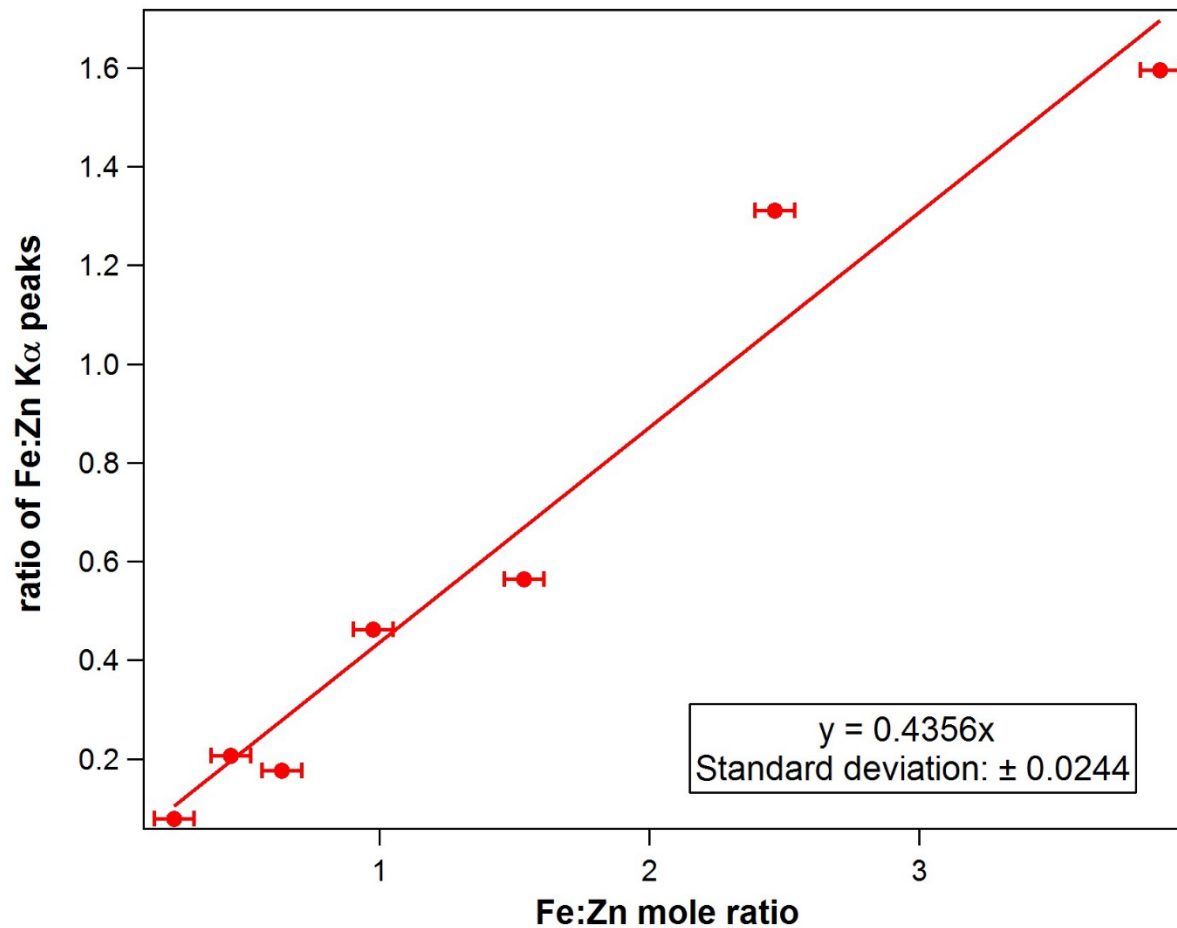

**Figure S13.** Solid-state X-ray fluorescence calibration curve obtained from homogeneous powder samples of ferrocene and bis[4,4,4-trifluoro-1-(2-thienyl-1,3-butanedionato)]zinc·(TMEDA).



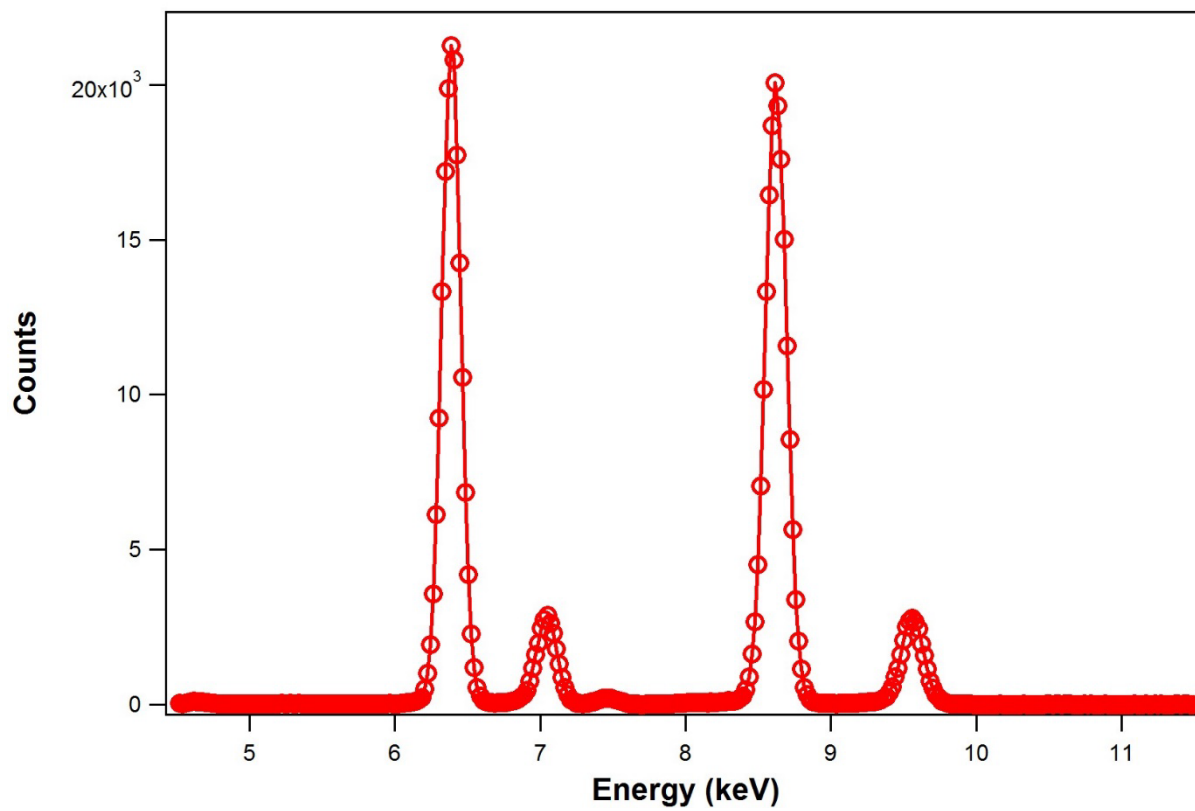

**Figure S14.** X-ray fluorescence spectrum of  $(^{tb^sL})Fe_2Zn(thf)$  (**5**).

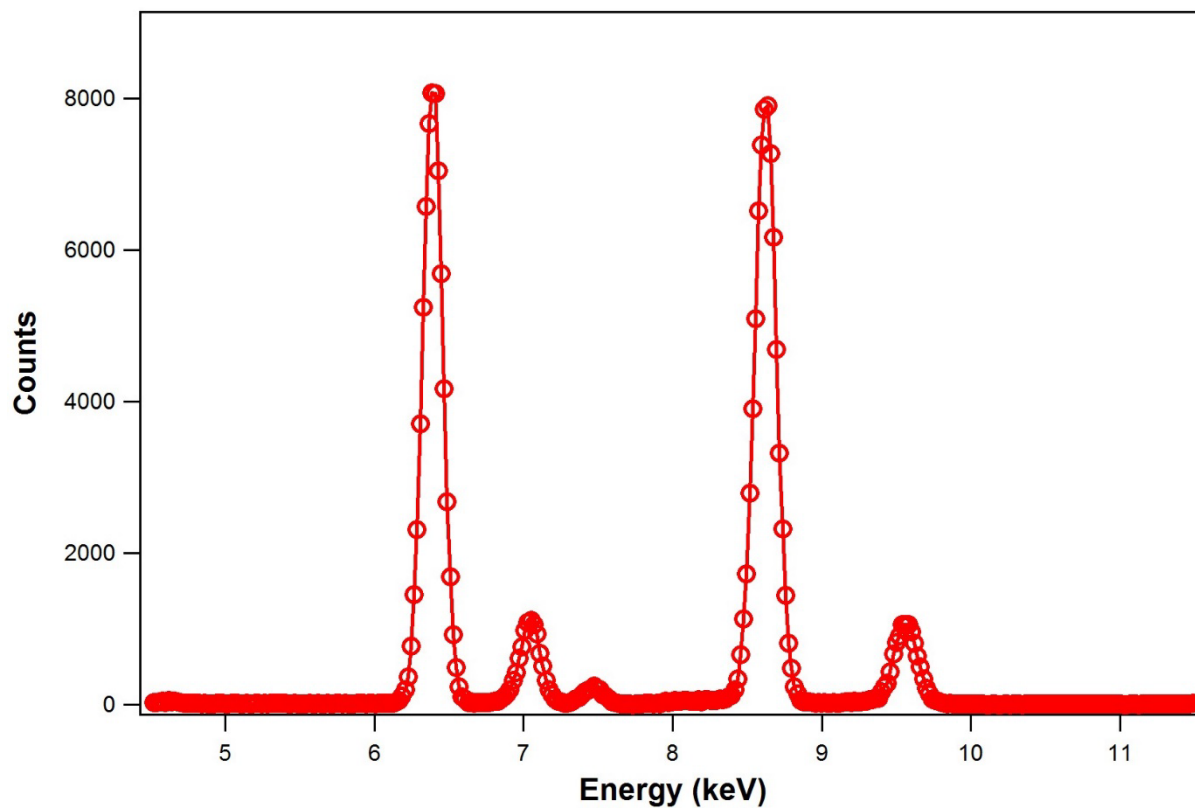

**Figure S15.** X-ray fluorescence spectrum of  $(^{tb^sL})Fe_2Zn(py)$  (**6**).

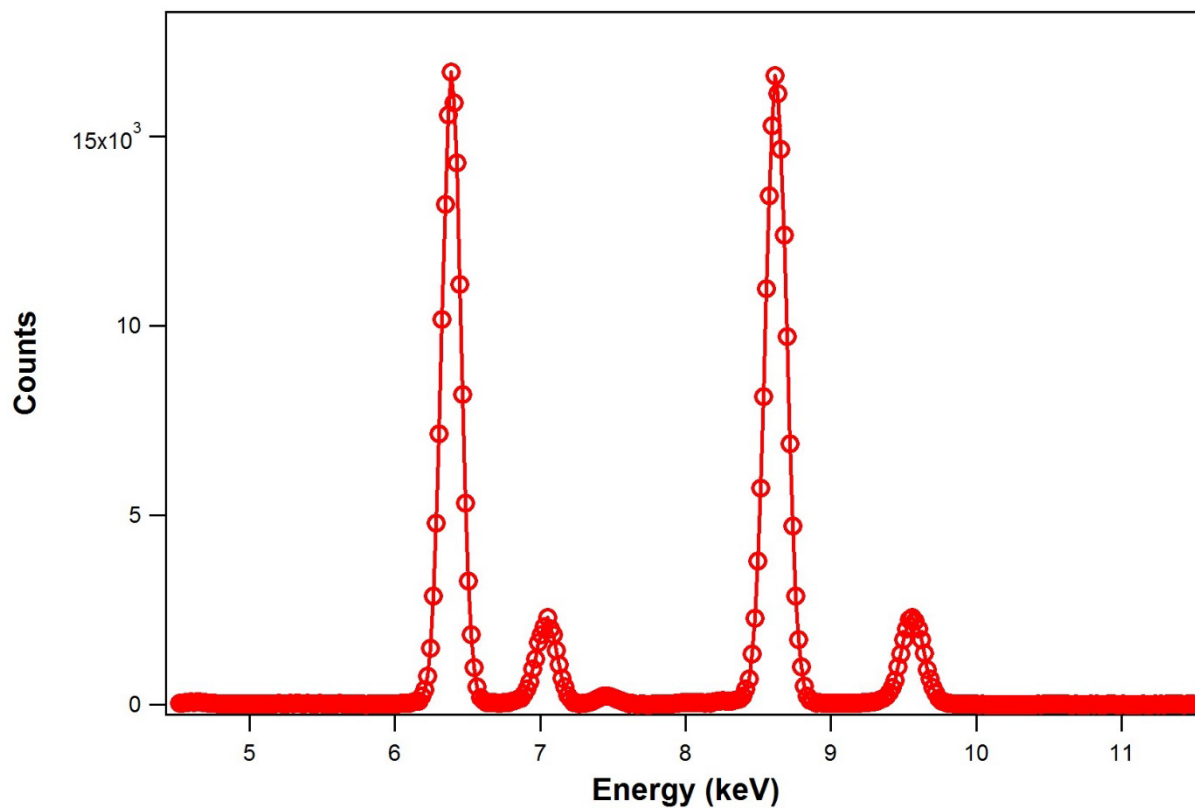

**Figure S16.** X-ray fluorescence spectrum of  $[\text{NBu}_4][((\text{tbsL})\text{Fe}_n\text{Zn}_{3-n}(\mu^3\text{-Cl}))]$  (**9**).

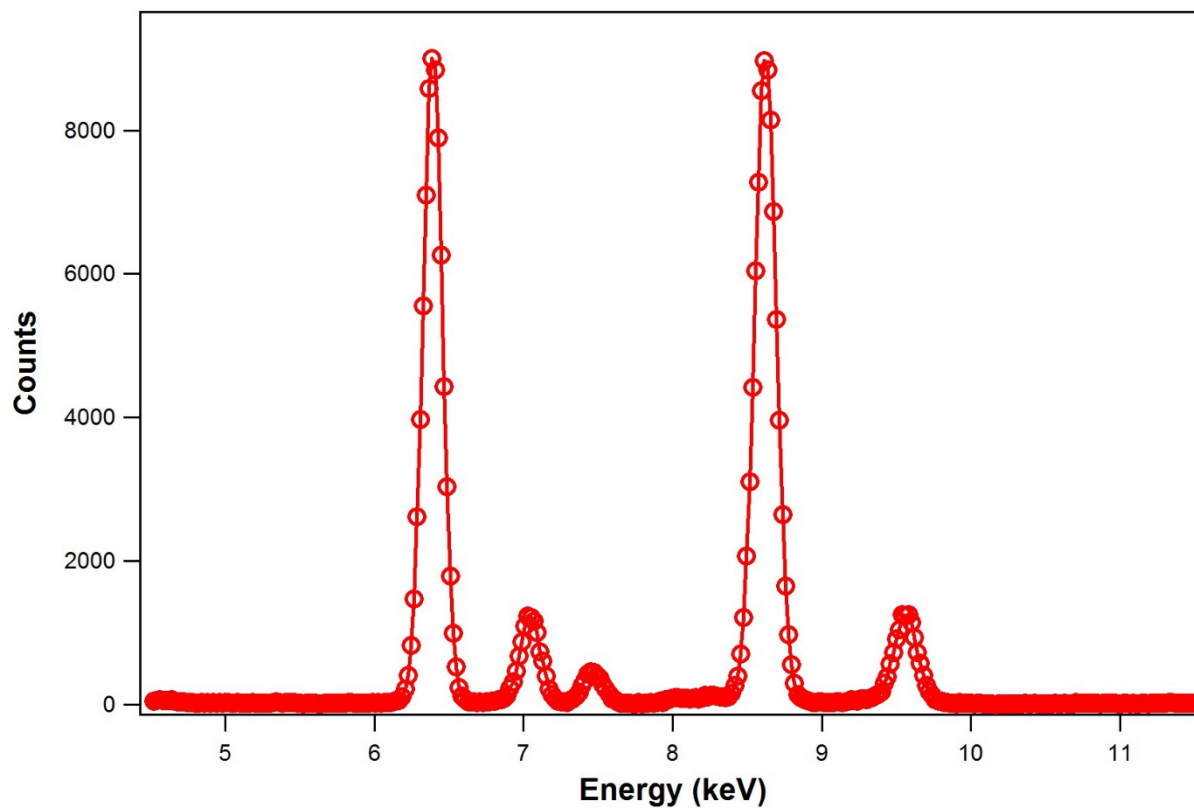

**Figure S17.** X-ray fluorescence spectrum of  $(^{tb^sL})Fe_2Zn(\mu^3-NPh)(py)$  (**12**).

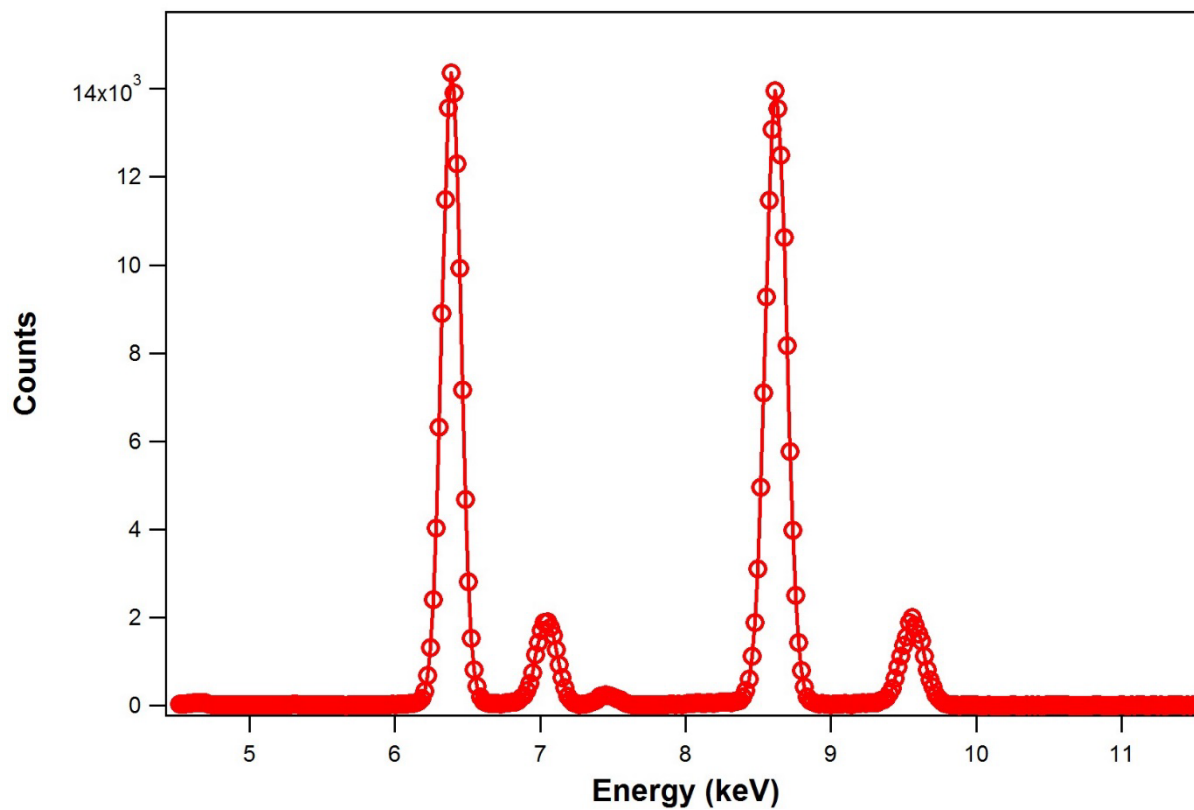

**Figure S18.** X-ray fluorescence spectrum of  $(^{tbsL})\text{Fe}_2\text{Zn}(\mu^3\text{-N}(3,5\text{-(CF}_3)_2\text{C}_6\text{H}_3))(\text{py})$  (**14**).

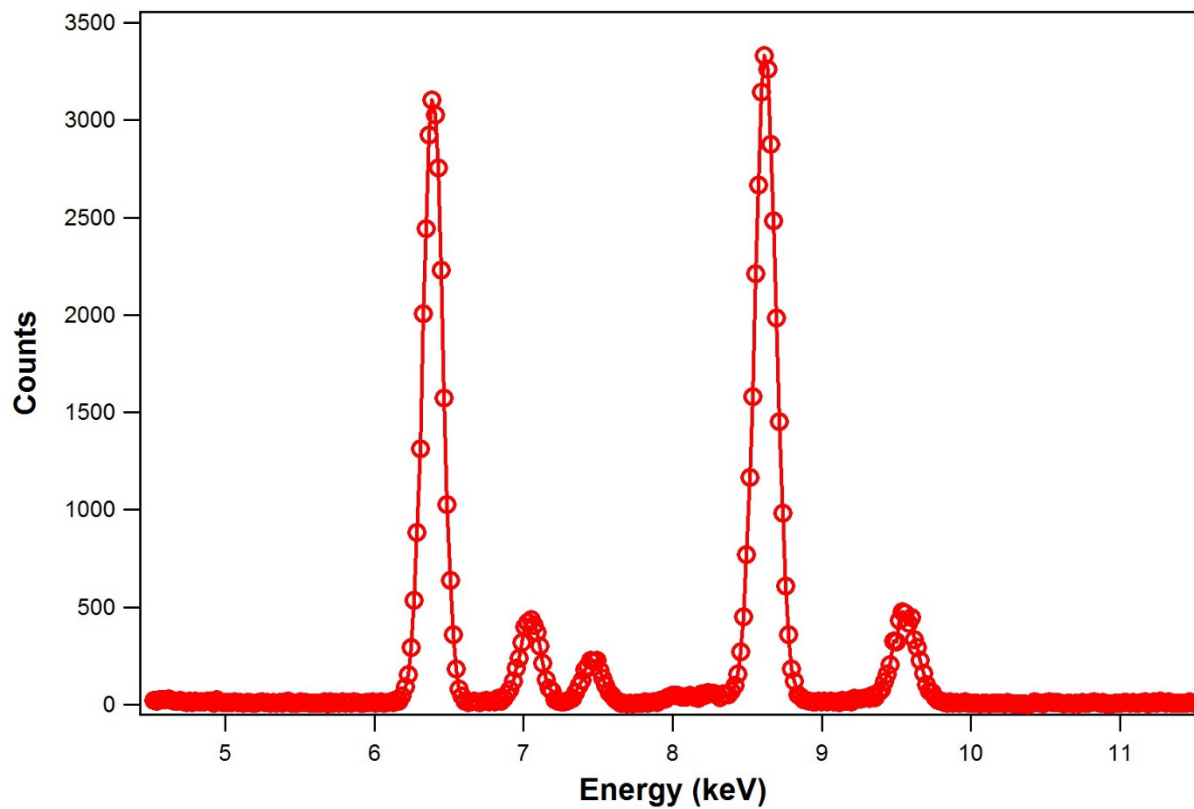

**Figure S19.** X-ray fluorescence spectrum of [2,2,2-cryptand(K)][(<sup>tbSL</sup>)Fe<sub>2</sub>Zn( $\mu^3$ -N(3,5-(CF<sub>3</sub>)<sub>2</sub>C<sub>6</sub>H<sub>3</sub>))] (**16**).

## NMR Spectroscopy

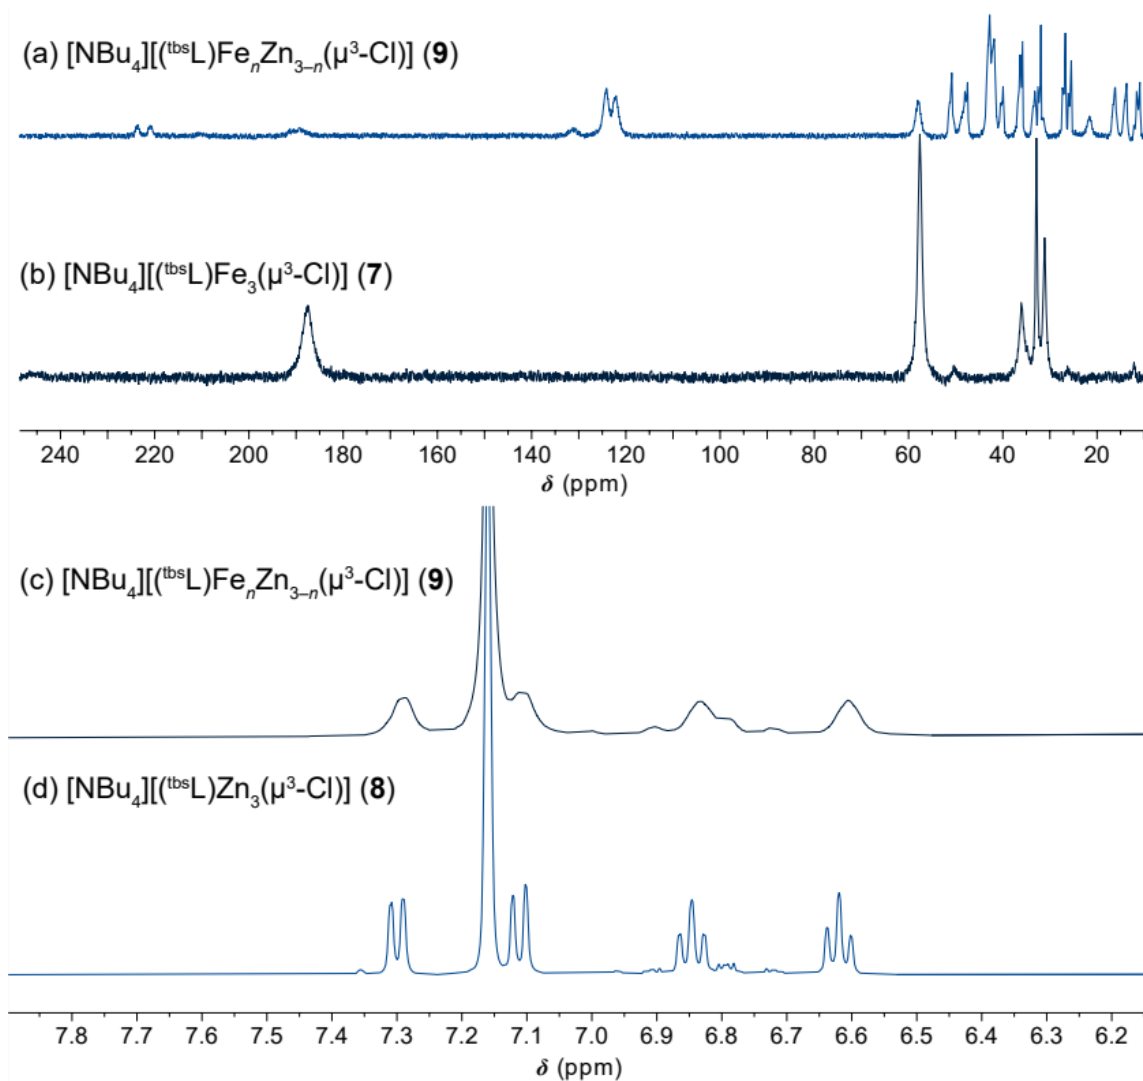

**Figure S20.** Comparison of  $^1\text{H}$  NMR spectra of  $[\text{NBu}_4][(\text{tbsL})\text{Fe}_n\text{Zn}_{3-n}(\mu^3\text{-Cl})]$  (9) with that of the analogous homometallic species  $[\text{NBu}_4][(\text{tbsL})\text{Fe}_3(\mu^3\text{-Cl})]$  (7) and  $[\text{NBu}_4][(\text{tbsL})\text{Zn}_3(\mu^3\text{-Cl})]$  (8). A portion of the paramagnetic window is shown for 9 (a) and 8 (b). The diamagnetic region has been removed from these spectra for clarity. The bottom figure shows an enlargement of the diamagnetic aromatic region of the spectra 9 (c) and 8 (d). The peaks highlighted in black in (a) and (c) correspond to the homometallic products which form upon anation of the hetero-metallic starting materials; the intense resonance at 7.16 ppm corresponds to the benzene solvent residual.

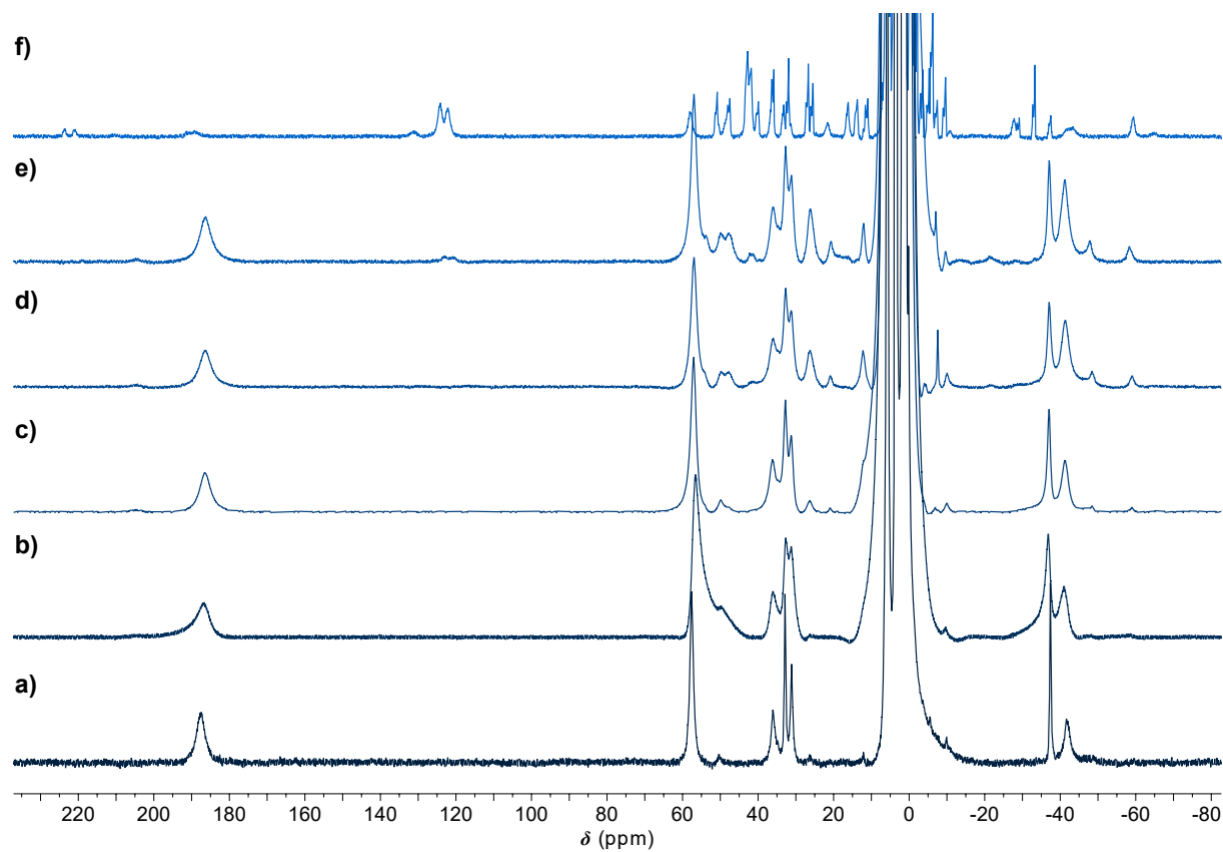

**Figure S21.**  $^1\text{H}$  NMR spectra of a mixture of  $[\text{NBu}_4][(\text{tbsL})\text{Fe}_3(\mu^3\text{-Cl})]$  (**7**) and  $[\text{NBu}_4][(\text{tbsL})\text{Zn}_3(\mu^3\text{-Cl})]$  (**8**) subjected to heat in THF: (a) authentic **7**, (b) 24 h at room temperature, (c) 24 h at  $40\text{ }^\circ\text{C}$ , (d) 24 h at  $60\text{ }^\circ\text{C}$ , (e) 24 h at  $80\text{ }^\circ\text{C}$ , (f) authentic  $[\text{NBu}_4][(\text{tbsL})\text{Fe}_n\text{Zn}_{3-n}(\mu^3\text{-Cl})]$  (**9**).



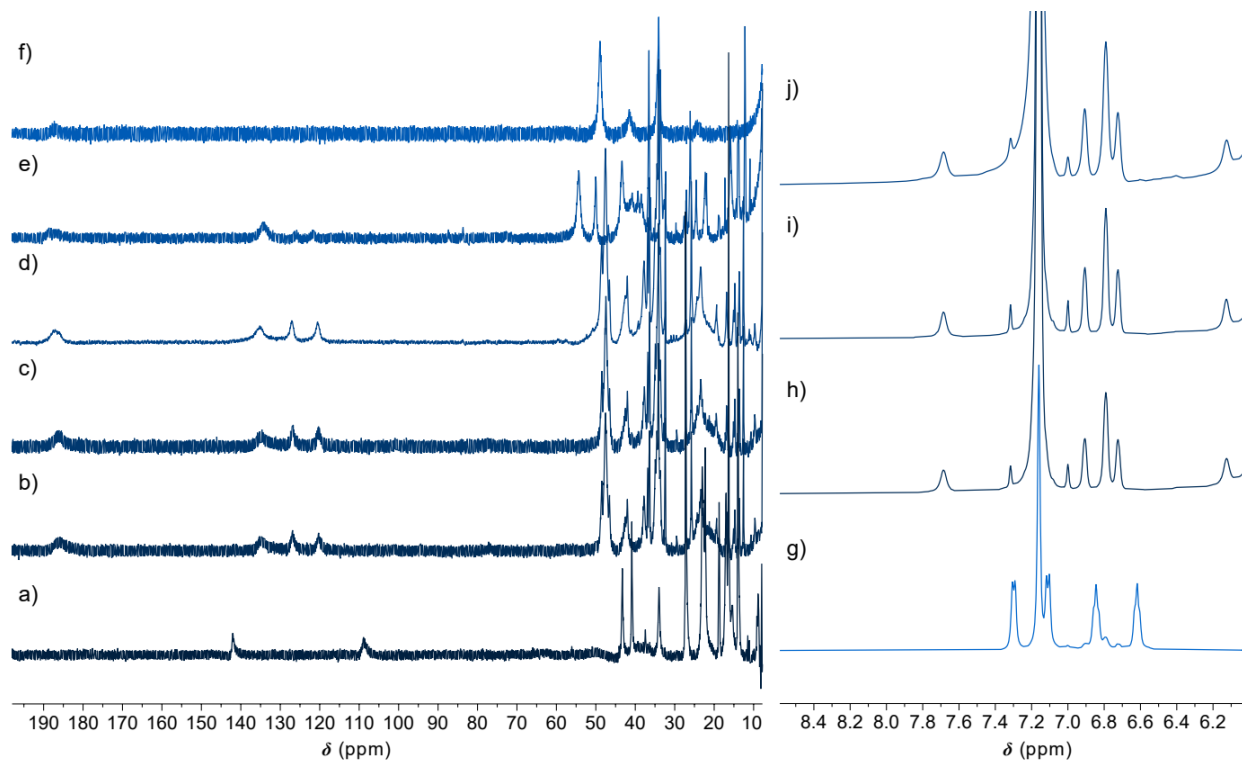

**Figure S22** Left: <sup>1</sup>H NMR spectra of a) (<sup>t</sup>bsL)Fe<sub>2</sub>Zn(thf) (**5**), b) the reaction mixture formed from **5** and [NBu<sub>4</sub>][(<sup>t</sup>bsL)Fe<sub>3</sub>(μ<sup>3</sup>-Cl)] (**7**) after 4 h, c) after 24 h, d) after 24 h at 60 °C, e) [NBu<sub>4</sub>][(<sup>t</sup>bsL)Fe<sub>n</sub>Zn<sub>3-n</sub>(μ<sup>3</sup>-Cl)] (**9**), and f) **7**, recorded in THF/C<sub>6</sub>D<sub>6</sub> (25% v/v). Right: Magnification of aromatic regions of the same spectra for g) [NBu<sub>4</sub>][(<sup>t</sup>bsL)Zn<sub>3</sub>(μ<sup>3</sup>-Cl)] (**8**), h) the reaction mixture formed from **5** and **7** after 4 h, i) after 24 h, and j) after 24 h at 60 °C.

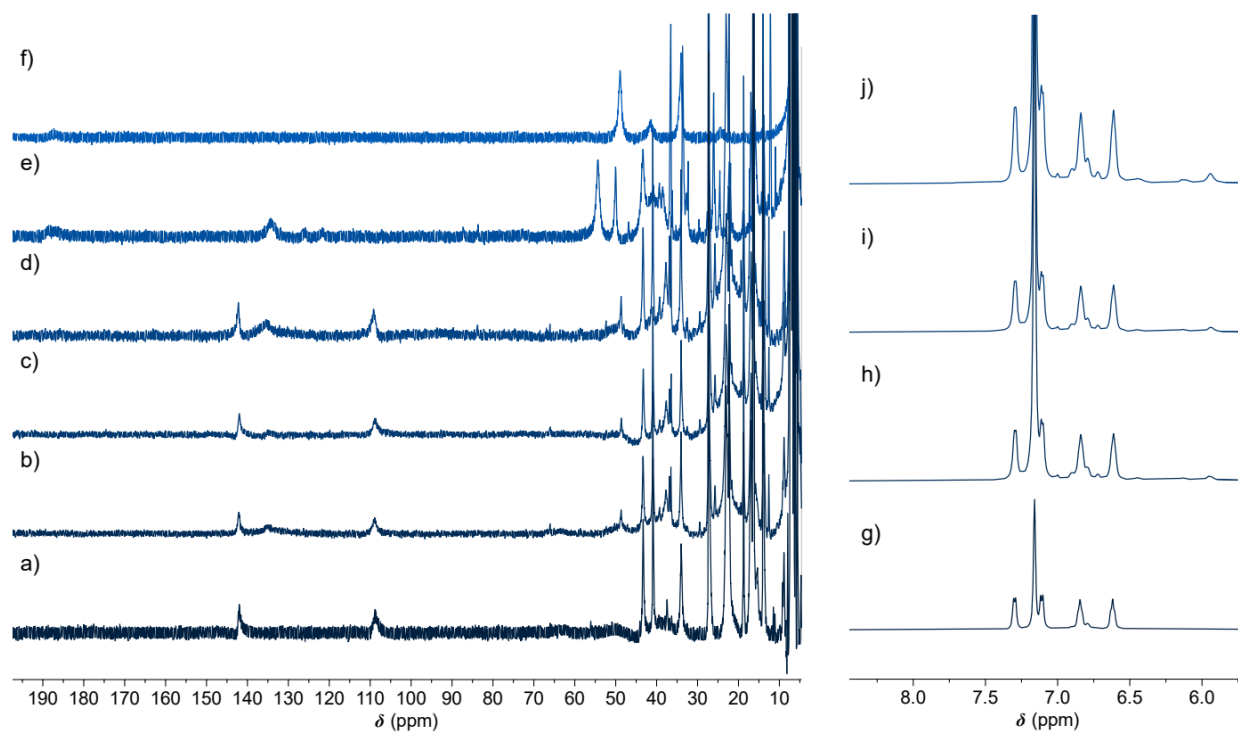

**Figure S23.** Left: <sup>1</sup>H NMR spectra of a) (<sup>t</sup>bsL)Fe<sub>2</sub>Zn(thf) (**5**), b) the reaction mixture formed from **5** and [NBu<sub>4</sub>][(<sup>t</sup>bsL)Zn<sub>3</sub>(μ<sup>3</sup>-Cl)] (**8**) after 4 h, c) after 24 h, d) after 24 h at 60 °C, e) [NBu<sub>4</sub>][(<sup>t</sup>bsL)Fe<sub>n</sub>Zn<sub>3-n</sub>(μ<sup>3</sup>-Cl)] (**9**), and f) [NBu<sub>4</sub>][(<sup>t</sup>bsL)Fe<sub>3</sub>(μ<sup>3</sup>-Cl)] (**7**), recorded in THF/C<sub>6</sub>D<sub>6</sub> (25% v/v). Right: Magnification of aromatic regions of the same spectra for g) **8**, h) the reaction mixture formed from **5** and **8** after 4 h, i) after 24 h, and j) after 24 h at 60 °C.

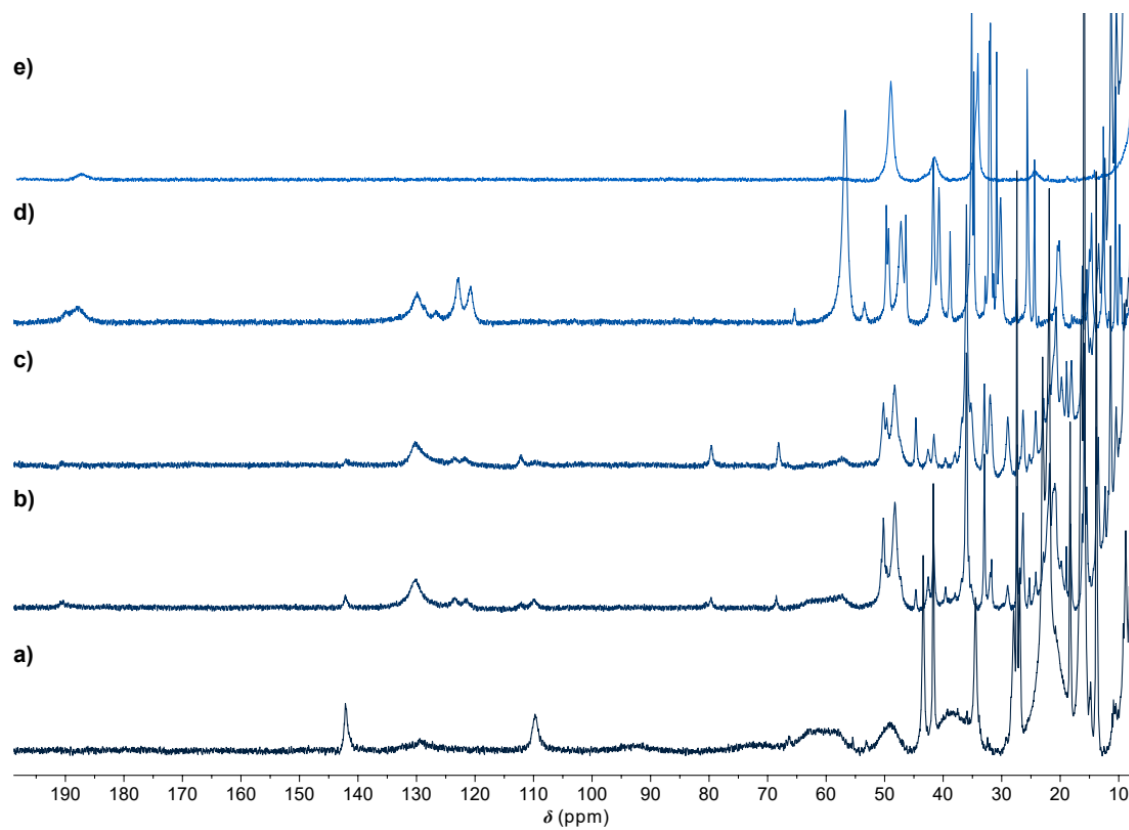

**Figure S24.**  $^1\text{H}$  NMR spectra of a)  $(^{\text{tbs}}\text{L})\text{Fe}_2\text{Zn}(\text{thf})$  (**5**), b) the reaction mixture formed from **5** and  $\text{FeCl}_2$  after 4 h, c) after 24 h, d)  $[\text{NBu}_4][(^{\text{tbs}}\text{L})\text{Fe}_n\text{Zn}_{3-n}(\mu^3\text{-Cl})]$  (**9**), and e)  $[\text{NBu}_4][(^{\text{tbs}}\text{L})\text{Fe}_3(\mu^3\text{-Cl})]$  (**7**), recorded in THF.

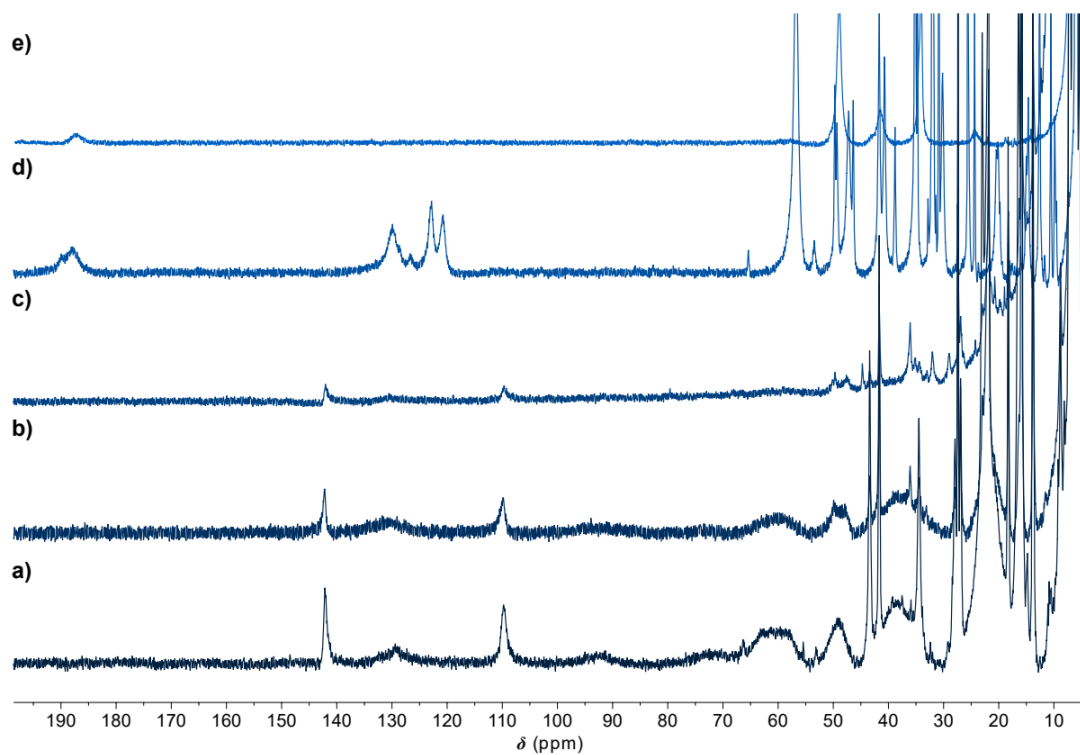

**Figure S25.**  $^1\text{H}$  NMR spectra of a)  $(^{\text{tbs}}\text{L})\text{Fe}_2\text{Zn}(\text{thf})$  (**5**), b) the reaction mixture formed from **5** and  $\text{ZnCl}_2$  after 4 h, c) after 24 h, d)  $[\text{NBu}_4][(^{\text{tbs}}\text{L})\text{Fe}_n\text{Zn}_{3-n}(\mu^3\text{-Cl})]$  (**9**), and e)  $[\text{NBu}_4][(^{\text{tbs}}\text{L})\text{Fe}_3(\mu^3\text{-Cl})]$  (**7**), recorded in THF.

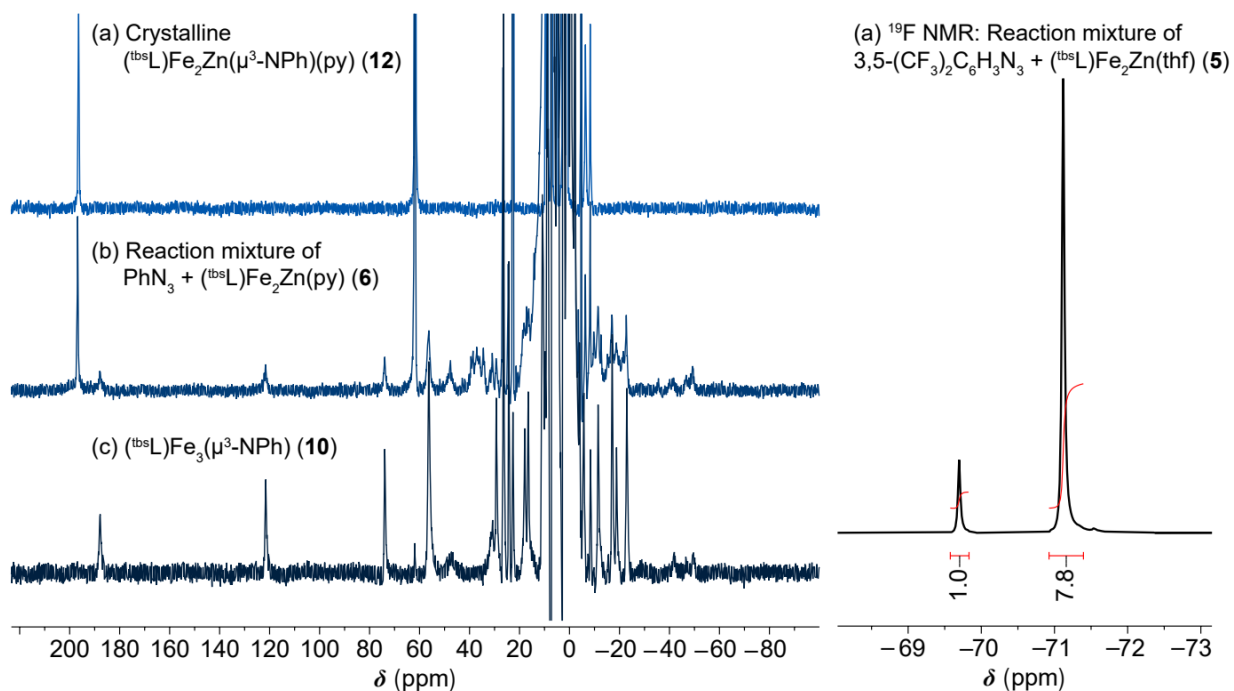

**Figure S26.** Comparison of  $^1\text{H}$  NMR spectrum of  $(\text{tbsL})\text{Fe}_3(\mu^3\text{-NPh})$  (**10**) (c) with that of the crystalline mixed-metal product  $(\text{tbsL})\text{Fe}_2\text{Zn}(\mu^3\text{-NPh})(\text{py})$  (**12**) (a) and the reaction mixture formed by treatment of  $(\text{tbsL})\text{Fe}_2\text{Zn}(\text{py})$  (**6**) with phenyl azide (b). The right-hand figure (d) shows the integrated  $^{19}\text{F}$  NMR spectrum of the products obtained via reaction of  $(\text{tbsL})\text{Fe}_2\text{Zn}(\text{thf})$  (**5**) with 3,5- $(\text{CF}_3)_2\text{C}_6\text{H}_3\text{N}_3$ . The smaller of the two peaks ( $-69.7$  ppm) represents the triiron product  $(\text{tbsL})\text{Fe}_3(\mu^3\text{-N}(3,5\text{-}(\text{CF}_3)_2\text{C}_6\text{H}_3))$ , while the larger peak ( $-71.1$  ppm) represents the mixed-metal species  $(\text{tbsL})\text{Fe}_2\text{Zn}(\mu^3\text{-N}(3,5\text{-}(\text{CF}_3)_2\text{C}_6\text{H}_3))$ , indicating a 7.8:1 ratio of products, with the diiron species dominating the mixture.

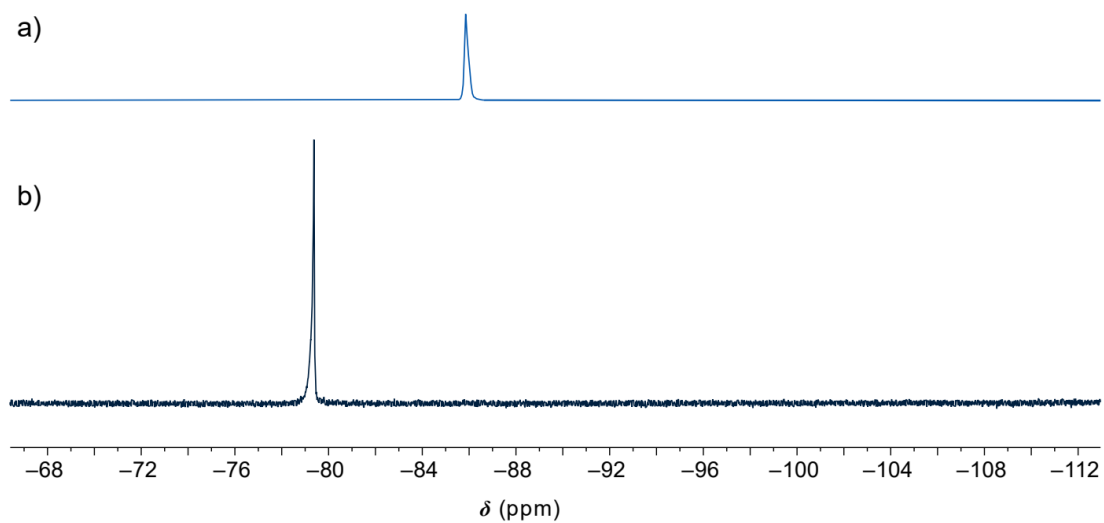

**Figure S27.**  $^{19}\text{F}$  NMR spectra for  $[\text{CoCp}^*_2][(\text{t}^{\text{bs}}\text{L})\text{Fe}_3(\mu^3\text{-N}(3,5\text{-}(\text{CF}_3)_2\text{C}_6\text{H}_3))]$  (**15**) (a) and  $[\text{2,2,2-cryptand}(\text{K})][(\text{t}^{\text{bs}}\text{L})\text{Fe}_2\text{Zn}(\mu^3\text{-N}(3,5\text{-}(\text{CF}_3)_2\text{C}_6\text{H}_3))]$  (**16**) (b).

## SQUID Magnetometry

Dc susceptibility and magnetization data for **1** were simultaneously modeled according to a spin-Hamiltonian for three exchange-coupled spins in an equilateral arrangement ( $J_1 = J_2 = J_3$ ):  $\hat{H} = -2(J_1\hat{S}_1\hat{S}_2 + J_2\hat{S}_1\hat{S}_3 + J_3\hat{S}_2\hat{S}_3) + D\hat{S}_z^2 + E(\hat{S}_x^2 + \hat{S}_y^2) + g\mu_B\hat{S}B$ . The fit parameters are:  $J = +40(1) \text{ cm}^{-1}$ ,  $D = 20.0(9) \text{ cm}^{-1}$ ,  $|E/D| = 0.082(7) \text{ cm}^{-1}$ , and  $g = 1.92(1)$ . Attempts to fit the data according to an isosceles ( $J_1 = J_2 \neq J_3$ ) or to a scalene triangle ( $J_1 \neq J_2 \neq J_3$ ) gave physically implausible values of the exchange coupling constants, zero-field splitting parameters, or both. A fit of the data according to a single "giant-spin" system using a spin-Hamiltonian of the form  $\hat{H} = D\hat{S}_z^2 + E(\hat{S}_x^2 + \hat{S}_y^2) + g\mu_B\hat{S}B$  provided an inferior fit of the dc susceptibility data that did not reproduce the diminution of  $\chi_{\text{MT}}$  at higher temperatures.

Attempts to fit the dc susceptibility and magnetization data for **5** were unsuccessful when considering either an exchange-coupled two spin system or a single  $S = 4$  manifold. Inclusion of temperature independent paramagnetism or intermolecular interaction ( $zJ$ ) terms did not provide physically reasonable fits. A likely explanation for this is the contamination of **5** with trace quantities of **1**. This possibility seems reasonable in light of the facile metal redistribution observed in complexes of this family; indeed, the presence of even trace quantities of **1**, which possesses a much larger value of  $\chi_{\text{MT}}$  across the surveyed temperature range, will significantly impact attempts to fit the data. Nonetheless, the essential features of the dc susceptibility and magnetization data strongly indicate that **5** is an antiferromagnetically coupled system which populates high-spin states at higher temperatures.

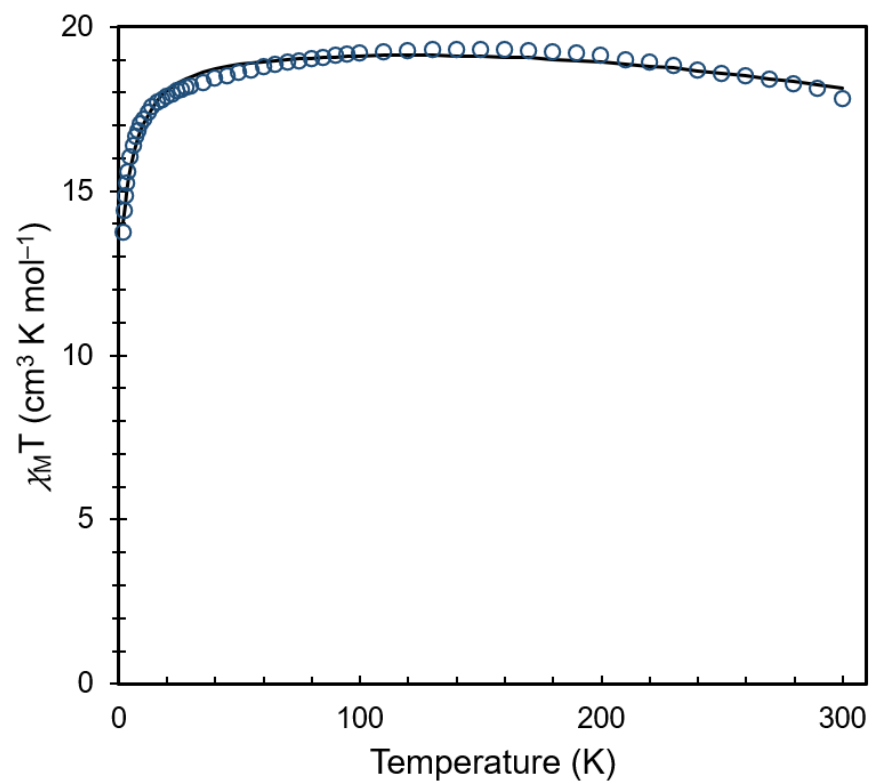

**Figure S28.** Plot of  $\chi_M T$  for  $(\text{tbsL})\text{Fe}_3(\text{thf})$  (**1**) over a temperature range of 1.8-300 K. Experimental data are denoted by open circles, and the fit is denoted by a black line.



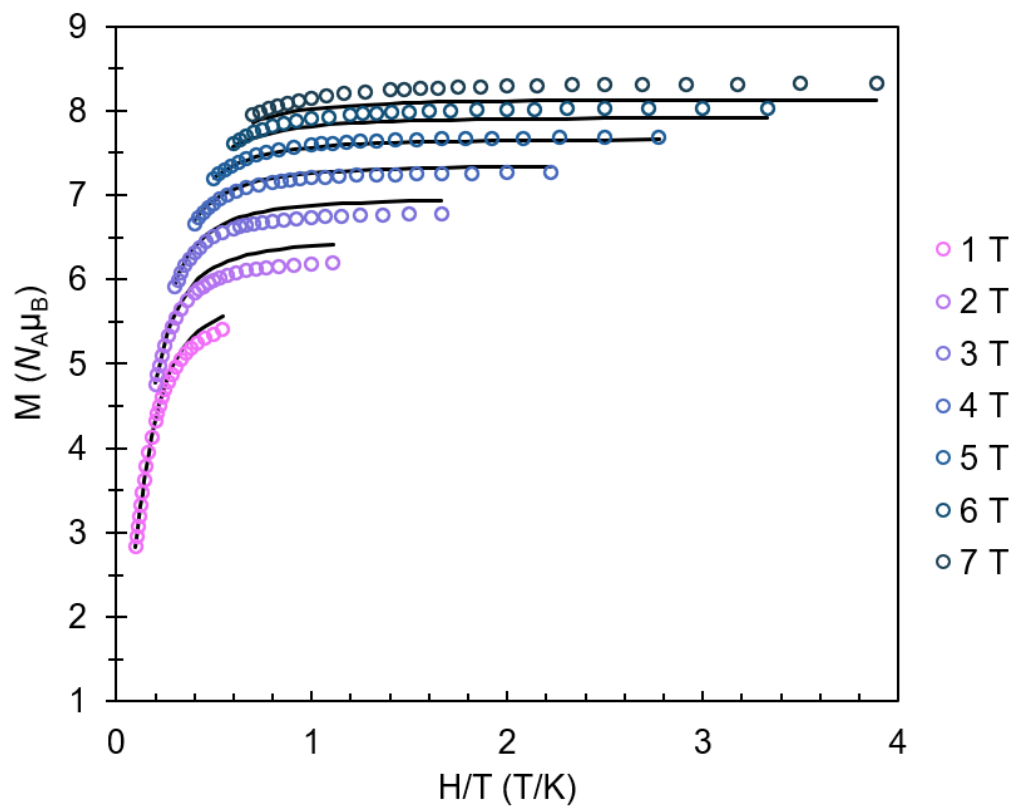

**Figure S29.** Plot of reduced magnetization for  $(t^{bsL})Fe_3(thf)$  (**1**) over a temperature range of 1.8-10 K and an applied field range of 1.0-7.0 T. Experimental data are denoted by open circles, and the fit is denoted by a black line.

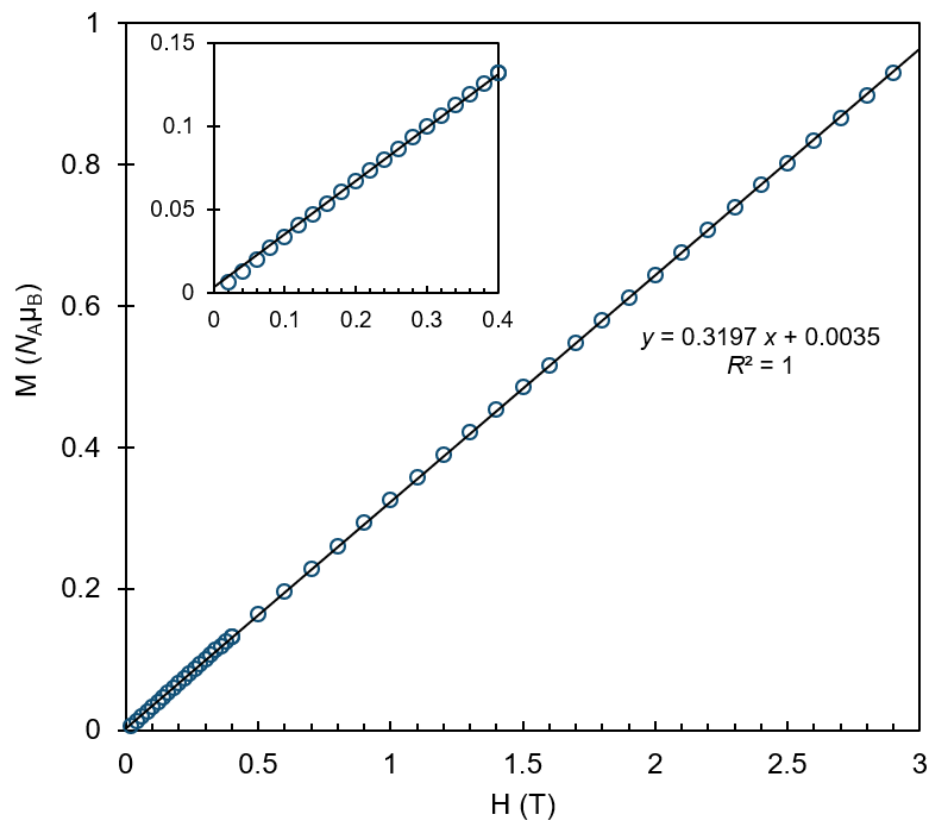

**Figure S30.** Plot of magnetization for  $(tbsL)Fe_3(thf)$  (**1**) obtained at 100 K over an applied field of 0-3.0 T. Inset: expansion of low-field region. Linearity of the plot demonstrates the absence of ferromagnetic impurities.

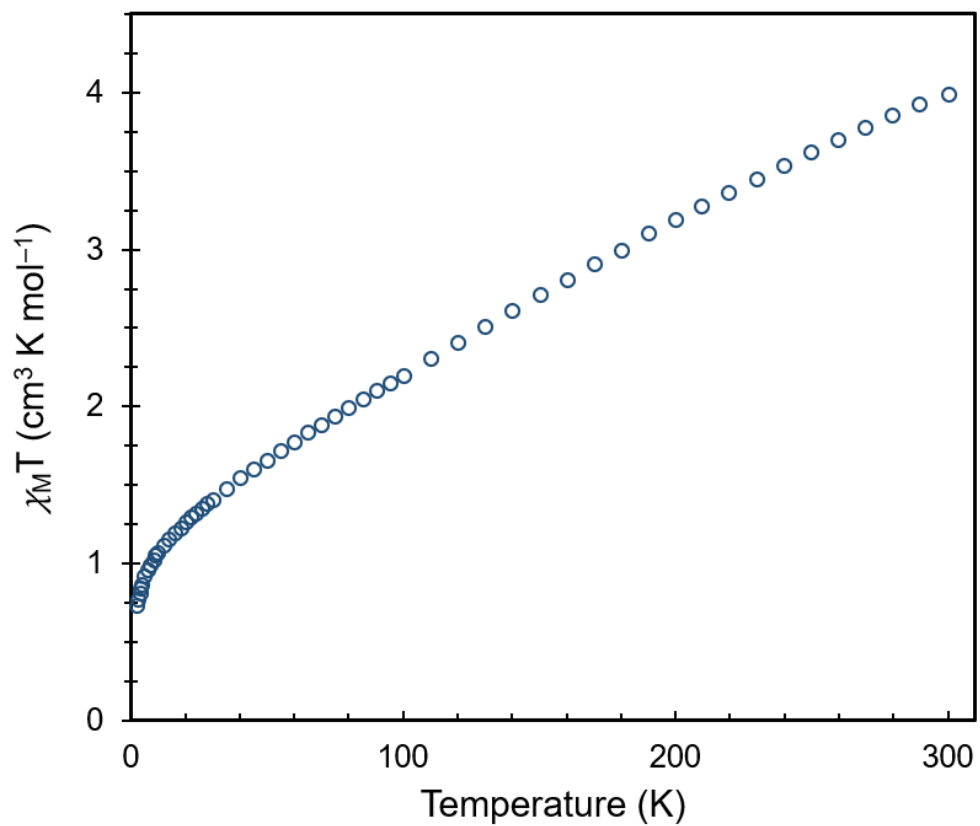

**Figure S31.** Plot of  $\chi_M T$  data for  $(^{t^bsL})\text{Fe}_2\text{Zn}(\text{thf})$  (**5**) over a temperature range of 1.8-300 K. Experimental data are denoted by open circles.

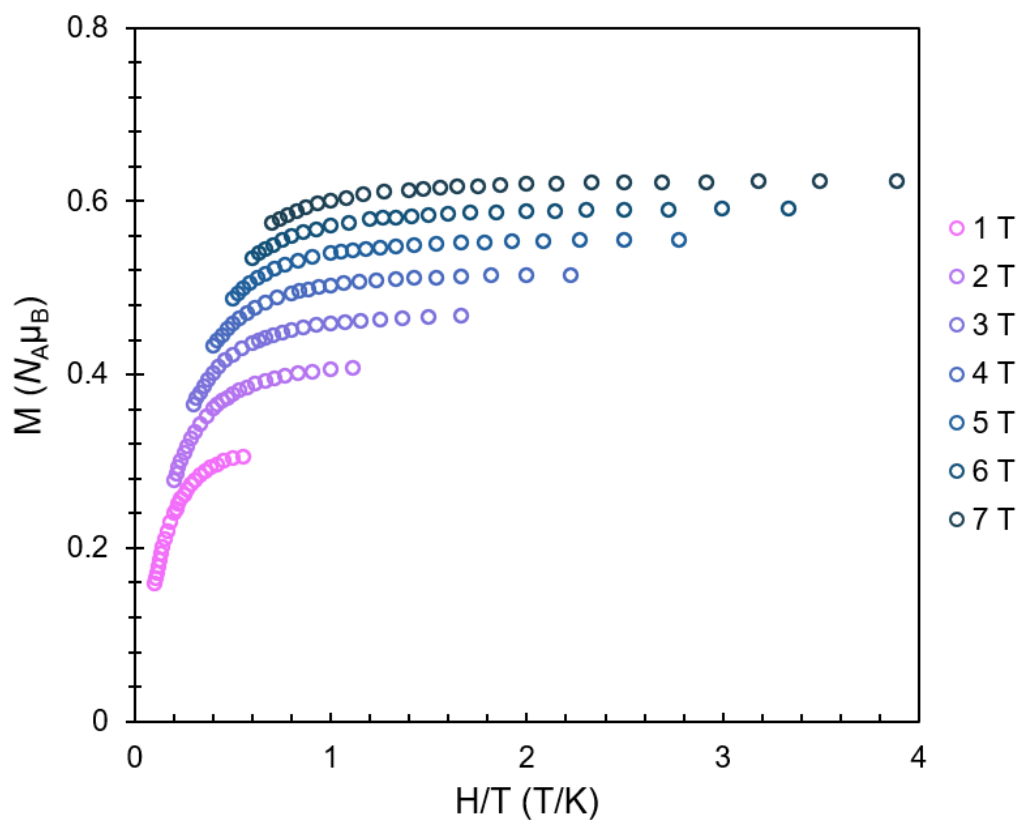

**Figure S32.** Plot of reduced magnetization for  $(^{tb^sL})\text{Fe}_2\text{Zn}(\text{thf})$  (**5**) over a temperature range of 1.8-10 K and an applied field range of 1.0-7.0 T. Experimental data are denoted by open circles.

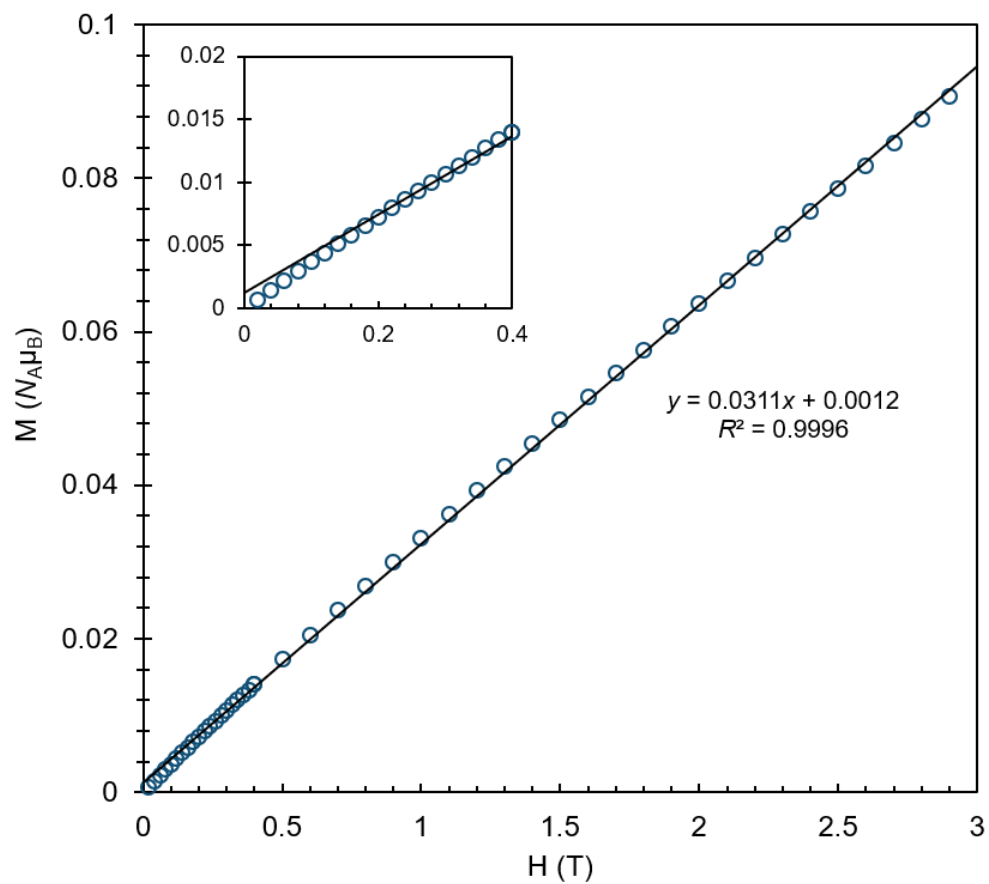

**Figure S33.** Plot of magnetization for  $(^{tb^sL})\text{Fe}_2\text{Zn}(\text{thf})$  (**5**) obtained at 100 K over an applied field of 0-3.0 T. Inset: expansion of low-field region. Linearity of the plot demonstrates the absence of ferromagnetic impurities.

## X-Ray Diffraction Techniques

All structures were collected on a Bruker three-circle platform goniometer equipped with an Apex II CCD area detector and an Oxford cryostream cooling device. Radiation was from a graphite fine focus sealed Mo K $\alpha$  (0.71073 Å) source or synchrotron radiation as specified. Crystals were mounted on a cryoloop or glass fiber pin using Paratone-N oil. Structures were collected at 100 K. Data was collected as a series of  $\varphi$  and/or  $\omega$  scans. Data was integrated using SAINT<sup>8</sup> and scaled with either a numerical or multi-scan absorption correction using SADABS<sup>8</sup>. The structures were solved by intrinsic phasing or direct methods using SHELXS-97<sup>9</sup> and refined against  $F^2$  on all data by full matrix least squares with SHELXL-97<sup>9</sup>. All non-hydrogen atoms were refined anisotropically. Hydrogen atoms were placed at idealized positions and refined using a riding model. The isotropic displacement parameters of all hydrogen atoms were fixed to 1.2 times the atoms they are linked to (1.5 times for methyl groups). Further details on particular structures are noted below.

**(<sup>tbs</sup>L)Fe<sub>3</sub>(py) (2).** The structure was solved in the monoclinic space group  $P2_1/c$  with four molecules per unit cell. The asymmetric unit was found to contain one molecule of **2** and approximately two molecules of disordered ether. Data was collected at APS using 0.41328 Å radiation. Seven reflections were omitted due to detector overflow.

**[Na(thf)(OEt<sub>2</sub>)][(<sup>tbs</sup>L)Fe<sub>2</sub>Na(OEt<sub>2</sub>)] (4).** The structure was solved in the triclinic space group  $P\bar{1}$  with two molecules per unit cell. The asymmetric unit was found to contain one molecule of **4**. Data was collected using sealed-tube Mo radiation. The sodium ion that is contained with the ligand pocket is bound to one molecule of solvent (diethyl ether), which is disordered over two positions. The second sodium ion, which is coordinated to the ligand via arene interactions is bound to two solvent molecules. One of the solvents is disordered between diethyl ether and tetrahydrofuran. Two of the t-butyl dimethylsilyl groups are modeled with positional disorder. Note: crystallization conditions result in difference in solvation from powder material.

**(<sup>tbs</sup>L)Fe<sub>2</sub>Zn(thf) (5).** The structure was solved in the monoclinic space group  $P2_1/n$  with four molecules per unit cell. The asymmetric unit was found to contain one molecule of (<sup>tbs</sup>L)Fe<sub>2</sub>Zn(thf) and one molecule of hexane. Data was collected at APS using 0.40659 Å radiation. Eight reflections were omitted due to detector overflow. Residual electron density from disordered solvent channels was removed using the SQUEEZE function in Platon.

**(<sup>tbs</sup>L)Fe<sub>2</sub>Zn(py) (6).** The structure was solved using the intrinsic phasing method in the triclinic space group  $P\bar{1}$  with two molecules per unit cell. The asymmetric unit was found to contain one molecule of (<sup>tbs</sup>L)Fe<sub>2</sub>Zn(py) and half a molecule of hexane (located on a special position). Data was collected at APS using 0.40651 Å radiation. Eleven reflections were omitted due to detector overflow.

**[NBu<sub>4</sub>][(<sup>tbs</sup>L)Fe<sub>n</sub>Zn<sub>3-n</sub>( $\mu^3$ -Cl)] (9).** The structure was solved in the orthorhombic space group  $Pbca$  with eight molecules per unit cell. The asymmetric unit was found to contain one molecule of **9**. Data was collected using sealed-tube Mo radiation. Residual electron density from disordered solvent channels was removed using SQUEEZE function in Platon. Disorder was modeled in butyl group of the tetrabutylammonium counter ion. Occupancy of each metal site was restricted to 67% Fe and 33% Zn.

**[NBu<sub>4</sub>][(<sup>tbs</sup>L)Fe<sub>3</sub>( $\mu^3$ -Cl)] (7).** The structure was solved in the orthorhombic space group  $Pbca$  with eight molecules per unit cell. The asymmetric unit was found to contain one molecule of **7**. Data was collected with sealed-tube Mo radiation. Residual electron density from disordered solvent channels was removed using the SQUEEZE function in Platon. Disorder was modeled in butyl group of the tetrabutylammonium counter ion.

**[NBu<sub>4</sub>][<sup>(tbs)</sup>LZn<sub>3</sub>(μ<sup>3</sup>-Cl)] (8)**. The structure was solved in the orthorhombic space group *Pbca* with 8 molecules per unit cell. The asymmetric unit was found to contain one molecule of **8**. Data was collected using sealed-tube Mo radiation. Residual electron density from disordered solvent channels was removed using the SQUEEZE function in Platon. Disorder was modeled in butyl group of the tetrabutylammonium counter ion.

**(<sup>(tbs)</sup>L)Fe<sub>2</sub>Zn(μ<sup>3</sup>-NPh) (11)**. The structure was solved in the monoclinic space group *C2/c* with eight molecules in the unit cell. The asymmetric unit was found to contain one molecule of **11**. Data was collected using sealed-tube Mo radiation. Residual electron density from disordered solvent channels was removed using the SQUEEZE function in Platon. Disorder was modeled in the orientation of one of the *tert*-butyldimethylsilyl groups of the ligand and in the orientation of the imido moiety. Occupancy of each metal site was restricted to 67% Fe and 33% Zn.

**(<sup>(tbs)</sup>L)Fe<sub>2</sub>Zn((μ<sup>3</sup>-NPh)(py) (12)**. The structure was solved in the triclinic space group *P-1* with 2 molecules per unit cell. The asymmetric unit was found to contain one molecule of **12**. Data was collected at APS using 0.40651 Å radiation. Residual electron density from disordered solvent channels was removed using the SQUEEZE function in Platon. Bad reflections were omitted due to detector overflow.

**(<sup>(tbs)</sup>L)Fe<sub>3</sub>(μ<sup>3</sup>-N(3,5-(CF<sub>3</sub>)<sub>2</sub>C<sub>6</sub>H<sub>3</sub>)) (13)**. The structure was solved in the monoclinic space group *P2<sub>1</sub>/n* with four molecules per unit cell. The asymmetric unit was found to contain one molecule of **13**. Data was collected using sealed-tube Mo radiation. There appears to be whole-molecule disorder, where the molecule is in two slightly different orientations. However, the occupancy of this second part of is so small that only metal atoms can be modeled. Additionally, disorder was modeled on one *tert*-butyldimethylsilyl group.

**(<sup>(tbs)</sup>L)Fe<sub>2</sub>Zn(μ<sup>3</sup>-N(3,5-(CF<sub>3</sub>)<sub>2</sub>C<sub>6</sub>H<sub>3</sub>))(py) (14)**. The structure was solved in the triclinic space group *P-1* with two molecules per unit cell. The asymmetric unit was found to contain one molecule of **14**. Data was collected using sealed-tube Mo radiation. Residual electron density from disordered solvent channels was removed using the SQUEEZE function in Platon. One of the CF<sub>3</sub> groups was modeled with rotational disorder.

**[CoCp\*<sub>2</sub>][(<sup>(tbs)</sup>L)Fe<sub>3</sub>(μ<sup>3</sup>-N(3,5-(CF<sub>3</sub>)<sub>2</sub>C<sub>6</sub>H<sub>3</sub>))] (15)**. The structure was solved in the monoclinic space group *P2<sub>1</sub>/n* with four molecules per unit cell. The asymmetric unit was found to contain one molecule of **15** and one molecule of diethyl ether. Data was collected using sealed-tube Mo radiation. Residual electron density from disordered solvent channels was removed using the SQUEEZE function in Platon. Both CF<sub>3</sub> groups were modeled with rotational disorder.

**[2,2,2-cryptand(K)][(<sup>(tbs)</sup>L)Fe<sub>2</sub>Zn(μ<sup>3</sup>-N(3,5-(CF<sub>3</sub>)<sub>2</sub>C<sub>6</sub>H<sub>3</sub>))] (16)**. The structure was solved in the triclinic space group *P-1* with four molecules per unit cell. The asymmetric unit was found to contain two molecules of **16** and several disordered diethyl ether solvent molecules. Data was collected at APS using 0.41328 Å radiation. Diethyl ether was modeled to fill the solvent voids in the structures, but has large ADPs due to large amounts of disorder. Occupancy of the metal sites was allowed to freely refine.

**Table S2** X-ray diffraction experimental details

|                            | <b>(<sup>tbs</sup>L)Fe<sub>3</sub>(py)<br/>(2)</b>                                                     | <b>[Na(thf)(OEt<sub>2</sub>)]<br/>[(<sup>tbs</sup>L)Fe<sub>2</sub>Na(OEt<sub>2</sub>)]<br/>(4·Et<sub>2</sub>O)</b>  | <b>(<sup>tbs</sup>L)Fe<sub>2</sub>Zn(thf)<br/>(5)</b>                                 | <b>(<sup>tbs</sup>L)Fe<sub>2</sub>Zn(py)<br/>(6)</b>                                 |
|----------------------------|--------------------------------------------------------------------------------------------------------|---------------------------------------------------------------------------------------------------------------------|---------------------------------------------------------------------------------------|--------------------------------------------------------------------------------------|
| <b>Chemical formula</b>    | C <sub>54</sub> H <sub>88.50</sub> Fe <sub>3</sub> N <sub>7</sub> O <sub>1.75</sub><br>Si <sub>3</sub> | C <sub>54</sub> H <sub>94.97</sub> Fe <sub>2</sub> N <sub>6</sub> Na <sub>2</sub> O <sub>3</sub><br>Si <sub>3</sub> | C <sub>52</sub> H <sub>88</sub> Fe <sub>2</sub> N <sub>6</sub> OSi <sub>3</sub><br>Zn | C <sub>50</sub> H <sub>78</sub> Fe <sub>2</sub> N <sub>7</sub> Si <sub>3</sub><br>Zn |
| <b>FW</b>                  | 1115.63                                                                                                | 1118.27                                                                                                             | 1074.62                                                                               | 1038.53                                                                              |
| <b>Crystal System</b>      | Monoclinic                                                                                             | Triclinic                                                                                                           | Monoclinic                                                                            | Triclinic                                                                            |
| <b>Space Group</b>         | <i>P</i> 2 <sub>1</sub> / <i>c</i>                                                                     | <i>P</i> -1                                                                                                         | <i>P</i> 2 <sub>1</sub> / <i>n</i>                                                    | <i>P</i> -1                                                                          |
| <b>Temperature (K)</b>     | 100                                                                                                    | 100                                                                                                                 | 100                                                                                   | 100                                                                                  |
| <b>a (Å)</b>               | 10.4451 (12)                                                                                           | 11.040 (2)                                                                                                          | 10.3835 (18)                                                                          | 10.6298 (8)                                                                          |
| <b>b (Å)</b>               | 27.261 (3)                                                                                             | 14.175 (3)                                                                                                          | 18.015 (2)                                                                            | 11.1655 (9)                                                                          |
| <b>c (Å)</b>               | 21.186 (3)                                                                                             | 21.290 (5)                                                                                                          | 30.663 (7)                                                                            | 23.6682 (18)                                                                         |
| <b>α (°)</b>               | 90                                                                                                     | 106.479 (4)                                                                                                         | 90                                                                                    | 98.248 (2)                                                                           |
| <b>β (°)</b>               | 102.166 (4)                                                                                            | 93.058 (4)                                                                                                          | 91.703 (6)                                                                            | 101.941 (2)                                                                          |
| <b>γ (°)</b>               | 90                                                                                                     | 106.770 (4)                                                                                                         | 90                                                                                    | 101.506 (2)                                                                          |
| <b>V (Å<sup>3</sup>)</b>   | 5897.2 (12)                                                                                            | 3025.6 (11)                                                                                                         | 5733.3 (17)                                                                           | 2642.6 (4)                                                                           |
| <b>Z</b>                   | 4                                                                                                      | 2                                                                                                                   | 4                                                                                     | 2                                                                                    |
| <b>Radiation type</b>      | Synchrotron<br>λ = 0.41328 Å                                                                           | Mo Kα                                                                                                               | Synchrotron<br>λ = 0.40659 Å                                                          | Synchrotron<br>λ = 0.40651 Å                                                         |
| <b>μ (mm<sup>-1</sup>)</b> | 0.17                                                                                                   | 0.60                                                                                                                | 0.51                                                                                  | 0.21                                                                                 |
| <b>Crystal size (mm)</b>   | 0.19 × 0.11 × 0.04                                                                                     | 0.3 × 0.2 × 0.1                                                                                                     | 0.14 × 0.08 × 0.02                                                                    | 0.17 × 0.06 × 0.02                                                                   |
| <b>R1<sup>a</sup></b>      | 0.042                                                                                                  | 0.040                                                                                                               | 0.059                                                                                 | 0.044                                                                                |
| <b>wR2<sup>b</sup></b>     | 0.107                                                                                                  | 0.093                                                                                                               | 0.148                                                                                 | 0.111                                                                                |
| <b>S (GOOF)</b>            | 1.04                                                                                                   | 1.01                                                                                                                | 1.02                                                                                  | 1.09                                                                                 |
| <b>Reflections</b>         | 12080                                                                                                  | 11243                                                                                                               | 17045                                                                                 | 8937                                                                                 |

$$^a R1 = [\sum w(F_o - F_c)^2 / \sum w F_o^2]^{1/2}$$

$$^b wR2 = [\sum [w(F_o^2 - F_c^2)^2] / \sum w(F_o^2)^2]^{1/2} \quad w = 1/[\sigma^2(F_o^2) + (aP)^2 + bP], \text{ where } P = [\max(F_o^2, 0) + 2((F_c^2))] / 3$$



Table S2. Continuation ...

|                            | [NBu <sub>4</sub> ][(tbsL)Fe <sub>3</sub> (Cl)]<br>(7)                            | [NBu <sub>4</sub> ][(tbsL)Zn <sub>3</sub> (Cl)]<br>(8)                            | [NBu <sub>4</sub> ][(tbsL)Fe <sub>3-n</sub> Zn <sub>n</sub> (Cl)]<br>(9)             | (tbsL)Fe <sub>3-n</sub> Zn <sub>n</sub> (NPh)<br>(11)                             |
|----------------------------|-----------------------------------------------------------------------------------|-----------------------------------------------------------------------------------|--------------------------------------------------------------------------------------|-----------------------------------------------------------------------------------|
| <b>Chemical formula</b>    | C <sub>57</sub> H <sub>100</sub> ClFe <sub>3</sub> N <sub>7</sub> Si <sub>3</sub> | C <sub>58</sub> H <sub>102</sub> ClN <sub>7</sub> Si <sub>3</sub> Zn <sub>3</sub> | C <sub>58</sub> H <sub>102</sub> ClFe <sub>2</sub> N <sub>7</sub> Si <sub>3</sub> Zn | C <sub>48</sub> H <sub>71</sub> Fe <sub>2</sub> N <sub>7</sub> Si <sub>3</sub> Zn |
| <b>FW</b>                  | 1170.70                                                                           | 1213.29                                                                           | 1194.25                                                                              | 1007.45                                                                           |
| <b>Crystal System</b>      | Orthorhombic                                                                      | Orthorhombic                                                                      | Orthorhombic                                                                         | Monoclinic                                                                        |
| <b>Space Group</b>         | <i>Pbca</i>                                                                       | <i>Pbca</i>                                                                       | <i>Pbca</i>                                                                          | <i>C2/c</i>                                                                       |
| <b>Temperature (K)</b>     | 100                                                                               | 100                                                                               | 100                                                                                  | 100                                                                               |
| <b>a (Å)</b>               | 26.839 (3)                                                                        | 27.1744 (9)                                                                       | 27.053 (4)                                                                           | 22.150 (4)                                                                        |
| <b>b (Å)</b>               | 19.358 (2)                                                                        | 19.1482 (7)                                                                       | 19.227 (3)                                                                           | 20.383 (3)                                                                        |
| <b>c (Å)</b>               | 27.601 (4)                                                                        | 27.5979 (10)                                                                      | 27.643 (4)                                                                           | 26.428 (4)                                                                        |
| <b>α (°)</b>               | 90                                                                                | 90                                                                                | 90                                                                                   | 90                                                                                |
| <b>β (°)</b>               | 90                                                                                | 90                                                                                | 90                                                                                   | 101.975 (3)                                                                       |
| <b>γ (°)</b>               | 90                                                                                | 90                                                                                | 90                                                                                   | 90                                                                                |
| <b>V (Å<sup>3</sup>)</b>   | 14340 (3)                                                                         | 14360.3 (9)                                                                       | 14378 (4)                                                                            | 11672 (3)                                                                         |
| <b>Z</b>                   | 8                                                                                 | 8                                                                                 | 8                                                                                    | 8                                                                                 |
| <b>Radiation type</b>      | Mo K <sub>α</sub>                                                                 | Mo K <sub>α</sub>                                                                 | Mo K <sub>α</sub>                                                                    | Mo K <sub>α</sub>                                                                 |
| <b>μ (mm<sup>-1</sup>)</b> | 0.72                                                                              | 1.12                                                                              | 0.85                                                                                 | 0.99                                                                              |
| <b>Crystal size (mm)</b>   | 0.40 × 0.30 × 0.20                                                                | 0.40 × 0.39 × 0.38                                                                | 0.33 × 0.26 × 0.16                                                                   | 0.30 × 0.20 × 0.10                                                                |
| <b>R1<sup>a</sup></b>      | 0.043                                                                             | 0.033                                                                             | 0.056                                                                                | 0.068                                                                             |
| <b>wR2<sup>b</sup></b>     | 0.126                                                                             | 0.079                                                                             | 0.131                                                                                | 0.143                                                                             |
| <b>S (GOOF)</b>            | 1.04                                                                              | 1.03                                                                              | 1.02                                                                                 | 1.09                                                                              |
| <b>Reflections</b>         | 13621                                                                             | 12718                                                                             | 12755                                                                                | 10413                                                                             |

$$^a R1 = [\sum w(F_o - F_c)^2 / \sum w F_o^2]^{1/2}$$

$$^b wR2 = [\sum [w(F_o^2 - F_c^2)^2] / \sum w (F_o^2)^2]^{1/2} \quad w = 1/[\sigma^2(F_o^2) + (aP)^2 + bP], \text{ where } P = [\max(F_o^2, 0) + 2((F_c^2)]/3$$

**Table S2.** Continuation ...

|                            | <sup>(tbsL)</sup> Fe <sub>2</sub> Zn(NPh)(py)<br>(12)                             | <sup>(tbsL)</sup> Fe <sub>3</sub> (N(3,5-(CF <sub>3</sub> ) <sub>2</sub> C <sub>6</sub> H <sub>3</sub> ))<br>(13) | <sup>(tbsL)</sup> Fe <sub>2</sub> Zn(N(3,5-(CF <sub>3</sub> ) <sub>2</sub> C <sub>6</sub> H <sub>3</sub> ))(py)<br>(14) |
|----------------------------|-----------------------------------------------------------------------------------|-------------------------------------------------------------------------------------------------------------------|-------------------------------------------------------------------------------------------------------------------------|
| <b>Chemical formula</b>    | C <sub>53</sub> H <sub>76</sub> Fe <sub>2</sub> N <sub>8</sub> Si <sub>3</sub> Zn | C <sub>50</sub> H <sub>69</sub> F <sub>6</sub> Fe <sub>3</sub> N <sub>7</sub> Si <sub>3</sub>                     | C <sub>55</sub> H <sub>74</sub> F <sub>6</sub> Fe <sub>2</sub> N <sub>8</sub> Si <sub>3</sub> Zn                        |
| <b>FW</b>                  | 1086.55                                                                           | 1133.94                                                                                                           | 1222.56                                                                                                                 |
| <b>Crystal System</b>      | Triclinic                                                                         | Monoclinic                                                                                                        | Triclinic                                                                                                               |
| <b>Space Group</b>         | <i>P</i> -1                                                                       | <i>P</i> 2 <sub>1</sub> / <i>n</i>                                                                                | <i>P</i> -1                                                                                                             |
| <b>Temperature (K)</b>     | 100                                                                               | 100                                                                                                               | 100                                                                                                                     |
| <b>a (Å)</b>               | 12.4239 (10)                                                                      | 15.1571 (7) 21.4890<br>(11) 16.3741 (8)                                                                           | 12.3372 (6)                                                                                                             |
| <b>b (Å)</b>               | 14.2358 (12)                                                                      |                                                                                                                   | 14.5673 (7)                                                                                                             |
| <b>c (Å)</b>               | 19.0442 (16)                                                                      |                                                                                                                   | 19.6915 (10)                                                                                                            |
| <b>α (°)</b>               | 109.6426 (17)                                                                     | 90                                                                                                                | 76.058 (1)                                                                                                              |
| <b>β (°)</b>               | 95.5642 (18)                                                                      | 93.577 (1)                                                                                                        | 73.437 (1)                                                                                                              |
| <b>γ (°)</b>               | 102.0493 (18)                                                                     | 90                                                                                                                | 79.142 (1)                                                                                                              |
| <b>V (Å<sup>3</sup>)</b>   | 3050.8 (4)                                                                        | 5322.8 (4)                                                                                                        | 3264.8 (3)                                                                                                              |
| <b>Z</b>                   | 2                                                                                 | 4                                                                                                                 | 2                                                                                                                       |
| <b>Radiation type</b>      | Synchrotron,<br>λ = 0.40651 Å                                                     | Mo Kα                                                                                                             | Mo Kα                                                                                                                   |
| <b>μ (mm<sup>-1</sup>)</b> | 0.19                                                                              | 0.94                                                                                                              | 0.91                                                                                                                    |
| <b>Crystal size (mm)</b>   | 0.30 × 0.15 × 0.10                                                                | 0.14 × 0.14 × 0.06                                                                                                | 0.45 × 0.26 × 0.22                                                                                                      |
| <b>R1<sup>a</sup></b>      | 0.043                                                                             | 0.066                                                                                                             | 0.033                                                                                                                   |
| <b>wR2<sup>b</sup></b>     | 0.13                                                                              | 0.194                                                                                                             | 0.079                                                                                                                   |
| <b>S (GOOF)</b>            | 1.04                                                                              | 1.02                                                                                                              | 1.03                                                                                                                    |
| <b>Reflections</b>         | 10463                                                                             | 9399                                                                                                              | 11581                                                                                                                   |

$$^aR1 = [\sum w(F_o - F_c)^2 / \sum w F_o^2]^{1/2}$$

$$^b wR2 = [\sum [w(F_o^2 - F_c^2)^2] / \sum w (F_o^2)^2]^{1/2} \quad w = 1/[\sigma^2(F_o^2) + (aP)^2 + bP], \text{ where } P = [\max(F_o^2, 0) + 2((F_c^2))] / 3$$

**Table S2.** Continuation ...

|                            | <b>[CoCp*<sub>2</sub>][<sup>(tbs)</sup>L)Fe<sub>3</sub>(N(3,5-(CF<sub>3</sub>)<sub>2</sub>C<sub>6</sub>H<sub>3</sub>))]<br/>(15)</b> | <b>[2,2,2-crypt(K)][<sup>(tbs)</sup>L)Fe<sub>2</sub>Zn(N(3,5-(CF<sub>3</sub>)<sub>2</sub>C<sub>6</sub>H<sub>3</sub>))]<br/>(16)</b>                                                                     |
|----------------------------|--------------------------------------------------------------------------------------------------------------------------------------|---------------------------------------------------------------------------------------------------------------------------------------------------------------------------------------------------------|
| <b>Chemical formula</b>    | C <sub>74</sub> H <sub>109</sub> CoF <sub>6</sub> Fe <sub>3</sub> N <sub>7</sub> OSi <sub>3</sub>                                    | C <sub>50</sub> H <sub>69</sub> F <sub>6</sub> Fe <sub>2</sub> N <sub>7</sub> Si <sub>3</sub> Zn·C <sub>18</sub> H <sub>36</sub> KN <sub>2</sub> O <sub>6</sub> ·2.63(C <sub>4</sub> H <sub>10</sub> O) |
| <b>FW</b>                  | 1533.57                                                                                                                              | 1753.01                                                                                                                                                                                                 |
| <b>Crystal System</b>      | Monoclinic                                                                                                                           | Triclinic                                                                                                                                                                                               |
| <b>Space Group</b>         | <i>P</i> 2 <sub>1</sub> / <i>n</i>                                                                                                   | <i>P</i> -1                                                                                                                                                                                             |
| <b>Temperature (K)</b>     | 100                                                                                                                                  | 100                                                                                                                                                                                                     |
| <b>a (Å)</b>               | 11.9733 (5)                                                                                                                          | 15.4746 (7)                                                                                                                                                                                             |
| <b>b (Å)</b>               | 26.2570 (9)                                                                                                                          | 23.8238 (11)                                                                                                                                                                                            |
| <b>c (Å)</b>               | 26.2043 (10)                                                                                                                         | 27.1431 (13)                                                                                                                                                                                            |
| <b>α (°)</b>               | 90                                                                                                                                   | 78.401 (1)                                                                                                                                                                                              |
| <b>β (°)</b>               | 100.148 (1)                                                                                                                          | 74.315 (1)                                                                                                                                                                                              |
| <b>γ (°)</b>               | 90                                                                                                                                   | 83.137 (1)                                                                                                                                                                                              |
| <b>V (Å<sup>3</sup>)</b>   | 8109.3 (5)                                                                                                                           | 9414.8 (8)                                                                                                                                                                                              |
| <b>Z</b>                   | 4                                                                                                                                    | 4                                                                                                                                                                                                       |
| <b>Radiation type</b>      | Mo Kα                                                                                                                                | Synchrotron,<br>λ = 0.41328 Å                                                                                                                                                                           |
| <b>μ (mm<sup>-1</sup>)</b> | 0.83                                                                                                                                 | 0.51                                                                                                                                                                                                    |
| <b>Crystal size (mm)</b>   | 0.20 × 0.18 × 0.08                                                                                                                   | 0.17 × 0.15 × 0.09                                                                                                                                                                                      |
| <b>R1<sup>a</sup></b>      | 0.070                                                                                                                                | 0.055                                                                                                                                                                                                   |
| <b>wR2<sup>b</sup></b>     | 0.183                                                                                                                                | 0.154                                                                                                                                                                                                   |
| <b>S (GOOF)</b>            | 1.02                                                                                                                                 | 1.03                                                                                                                                                                                                    |
| <b>Reflections</b>         | 14337                                                                                                                                | 37723                                                                                                                                                                                                   |

$$^a R1 = [\sum w(F_o - F_c)^2 / \sum w F_o^2]^{1/2}$$

$$^b wR2 = [\sum [w(F_o^2 - F_c^2)^2] / \sum w (F_o^2)^2]^{1/2} \quad w = 1/[\sigma^2(F_o^2) + (aP)^2 + bP], \text{ where } P = [\max(F_o^2, 0) + 2((F_c^2))] / 3$$

**Table S3.** Selected bond metrics (Å) of trinuclear complexes

| <b>Bond</b>        | <b>1</b>  | <b>2</b>  | <b>5</b>  | <b>6</b>  |
|--------------------|-----------|-----------|-----------|-----------|
| M1–M2              | 2.6128(6) | 2.6502(7) | 2.7354(9) | 2.8141(7) |
| M1–M3              | 2.6119(5) | 2.6306(7) | 3.1629(9) | 2.9792(6) |
| M2–M3              | 2.5061(5) | 2.5422(5) | 2.9399(6) | 2.8939(6) |
| M–M <sub>avg</sub> | 2.5769(9) | 2.608(1)  | 2.946(1)  | 2.896(1)  |

**Table S4.** Selected bond metrics of reaction products

| Compound                                                                                                                                          |                   | M–M                  |           | M–Ligand               |           |
|---------------------------------------------------------------------------------------------------------------------------------------------------|-------------------|----------------------|-----------|------------------------|-----------|
| [NBu <sub>4</sub> ][ <sup>(tbsL)</sup> Fe <sub>3</sub> (μ <sup>3</sup> -Cl)]                                                                      | (7)               | Fe1–Fe2              | 2.8061(8) | Fe1–Cl                 | 2.5579(8) |
|                                                                                                                                                   |                   | Fe1–Fe3              | 2.6813(6) | Fe2–Cl                 | 2.5177(8) |
|                                                                                                                                                   |                   | Fe2–Fe3              | 2.8281(8) | Fe3–Cl                 | 2.4785(7) |
|                                                                                                                                                   |                   | Fe–Fe <sub>avg</sub> | 2.772(1)  | Fe–Cl <sub>avg</sub>   | 2.518(1)  |
| [NBu <sub>4</sub> ][ <sup>(tbsL)</sup> Zn <sub>3</sub> (μ <sup>3</sup> -Cl)]                                                                      | (8)               | Zn1–Zn2              | 3.0176(8) | Zn1–Cl                 | 2.6173(8) |
|                                                                                                                                                   |                   | Zn1–Zn3              | 2.9444(8) | Zn2–Cl                 | 2.5016(7) |
|                                                                                                                                                   |                   | Zn2–Zn3              | 2.9942(8) | Zn3–Cl                 | 2.6209(8) |
|                                                                                                                                                   |                   | Zn–Zn <sub>avg</sub> | 2.985(1)  | Zn–Cl <sub>avg</sub>   | 2.579(1)  |
| [NBu <sub>4</sub> ][ <sup>(tbsL)</sup> Fe <sub>n</sub> Zn <sub>3-n</sub> (μ <sup>3</sup> -Cl)]                                                    | (9)               | M1–M2                | 2.8674(9) | M1–Cl                  | 2.641(1)  |
|                                                                                                                                                   |                   | M1–M3                | 2.9830(8) | M2–Cl                  | 2.568(1)  |
|                                                                                                                                                   |                   | M2–M3                | 2.9860(8) | M3–Cl                  | 2.501(1)  |
|                                                                                                                                                   |                   | M–M <sub>avg</sub>   | 2.945(1)  | M–Cl <sub>avg</sub>    | 2.570(1)  |
| <sup>(tbsL)</sup> Fe <sub>3</sub> (μ <sup>3</sup> -NPh) <sup>1b</sup>                                                                             | (10)              | Fe1–Fe2              | 2.549(1)  | Fe1–N <sub>im</sub>    | 1.936(5)  |
|                                                                                                                                                   |                   | Fe1–Fe3              | 2.502(1)  | Fe2–N <sub>im</sub>    | 1.944(5)  |
|                                                                                                                                                   |                   | Fe2–Fe3              | 2.539(1)  | Fe3–N <sub>im</sub>    | 1.944(5)  |
|                                                                                                                                                   |                   | Fe–Fe <sub>avg</sub> | 2.530(1)  | Fe–N <sub>im avg</sub> | 1.941(9)  |
| <sup>(tbsL)</sup> Fe <sub>2</sub> Zn(μ <sup>3</sup> -NPh)                                                                                         | (11)              | M1–M2                | 2.725(1)  | M1–N <sub>im</sub>     | 2.004(4)  |
|                                                                                                                                                   |                   | M1–M3                | 2.678(1)  | M2–N <sub>im</sub>     | 2.060(4)  |
|                                                                                                                                                   |                   | M2–M3                | 2.7010(9) | M3–N <sub>im</sub>     | 1.968(4)  |
|                                                                                                                                                   |                   | M–M <sub>avg</sub>   | 2.701(2)  | M–N <sub>im avg</sub>  | 2.011(7)  |
| <sup>(tbsL)</sup> Fe <sub>2</sub> Zn(μ <sup>3</sup> -NPh)(py)                                                                                     | (12)              | Fe1–Fe2              | 2.4880(6) | Fe1–N <sub>im</sub>    | 1.917(2)  |
|                                                                                                                                                   |                   | Fe1–Zn               | 3.2059(7) | Fe2–N <sub>im</sub>    | 1.961(2)  |
|                                                                                                                                                   |                   | Fe2–Zn               | 2.7599(6) | Zn–N <sub>im</sub>     | 2.077(3)  |
| <sup>(tbsL)</sup> Fe <sub>3</sub> (μ <sup>3</sup> -N(3,5-(CF <sub>3</sub> ) <sub>2</sub> C <sub>6</sub> H <sub>3</sub> ))                         | (13) <sup>a</sup> | Fe1–Fe2              | 2.457(2)  | Fe1–N <sub>im</sub>    | 1.977(5)  |
|                                                                                                                                                   |                   | Fe1–Fe3              | 2.668(2)  | Fe2–N <sub>im</sub>    | 1.931(5)  |
|                                                                                                                                                   |                   | Fe2–Fe3              | 2.520(2)  | Fe3–N <sub>im</sub>    | 1.972(5)  |
|                                                                                                                                                   |                   | Fe–Fe <sub>avg</sub> | 2.548(3)  | Fe–N <sub>im avg</sub> | 1.960(9)  |
| <sup>(tbsL)</sup> Fe <sub>2</sub> Zn(μ <sup>3</sup> -N(3,5-(CF <sub>3</sub> ) <sub>2</sub> C <sub>6</sub> H <sub>3</sub> ))(py)                   | (14)              | Fe1–Fe2              | 2.5008(6) | Fe1–N <sub>im</sub>    | 1.976(2)  |
|                                                                                                                                                   |                   | Fe1–Zn               | 2.7806(4) | Fe2–N <sub>im</sub>    | 1.932(2)  |
|                                                                                                                                                   |                   | Fe2–Zn               | 3.1982(6) | Zn–N <sub>im</sub>     | 2.084(2)  |
| [CoCp* <sub>2</sub> ][ <sup>(tbsL)</sup> Fe <sub>3</sub> (μ <sup>3</sup> -N(3,5-(CF <sub>3</sub> ) <sub>2</sub> C <sub>6</sub> H <sub>3</sub> ))] | (15)              | Fe1–Fe2              | 2.532(1)  | Fe1–N <sub>im</sub>    | 1.953(5)  |
|                                                                                                                                                   |                   | Fe1–Fe3              | 2.632(1)  | Fe2–N <sub>im</sub>    | 1.978(4)  |
|                                                                                                                                                   |                   | Fe2–Fe3              | 2.596(1)  | Fe3–N <sub>im</sub>    | 1.996(4)  |
|                                                                                                                                                   |                   | Fe–Fe <sub>avg</sub> | 2.587(1)  | Fe–N <sub>im avg</sub> | 1.976(7)  |
| [2,2,2-crypt(K)][ <sup>(tbsL)</sup> Fe <sub>2</sub> Zn(μ <sup>3</sup> -N(3,5-(CF <sub>3</sub> ) <sub>2</sub> C <sub>6</sub> H <sub>3</sub> ))]    | (16) <sup>b</sup> | M1–M2                | 2.7085(7) | M1–N <sub>im</sub>     | 2.032(3)  |
|                                                                                                                                                   |                   | M1–M3                | 2.6751(8) | M2–N <sub>im</sub>     | 2.035(3)  |
|                                                                                                                                                   |                   | M2–M3                | 2.7843(6) | M3–N <sub>im</sub>     | 2.010(2)  |
|                                                                                                                                                   |                   | M–M <sub>avg</sub>   | 2.723(1)  | M–N <sub>im avg</sub>  | 2.026(5)  |

<sup>a</sup>Bond metrics reported for one part of the disorder model in **13**, which represents >90% occupancy.

<sup>b</sup> Bond metrics listed for only one of the two clusters in the asymmetric unit (see Table S17 for full bond metric details).

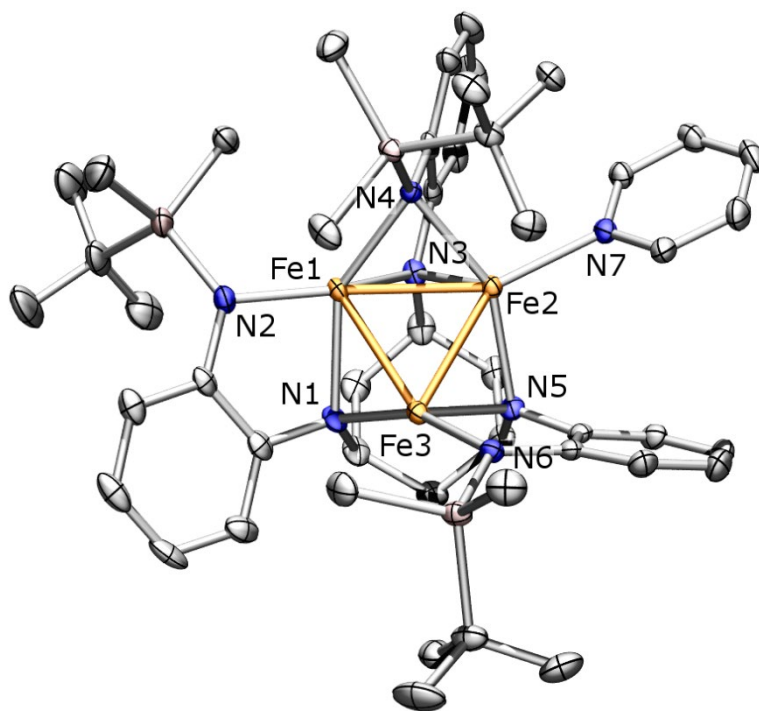

**Figure S34.** Solid state structure of  $(^{tbsL})\text{Fe}_3(\text{py})$  (**2**). Hydrogen atoms and ether solvent molecules have been omitted for clarity.

**Table S5.** Selected bond metrics for **2** (Å).

|         |           |        |          |
|---------|-----------|--------|----------|
| Fe1—Fe2 | 2.6502(7) | Fe2—N5 | 2.031(2) |
| Fe1—Fe3 | 2.6306(7) | Fe2—N4 | 2.120(2) |
| Fe2—Fe3 | 2.5422(5) | Fe2—N7 | 2.154(2) |
| Fe1—N2  | 1.966(2)  | Fe2—N3 | 2.166(2) |
| Fe1—N3  | 2.030(2)  | Fe3—N6 | 1.937(2) |
| Fe1—N1  | 2.115(2)  | Fe3—N1 | 1.959(2) |
| Fe1—N4  | 2.134(2)  | Fe3—N5 | 2.053(2) |

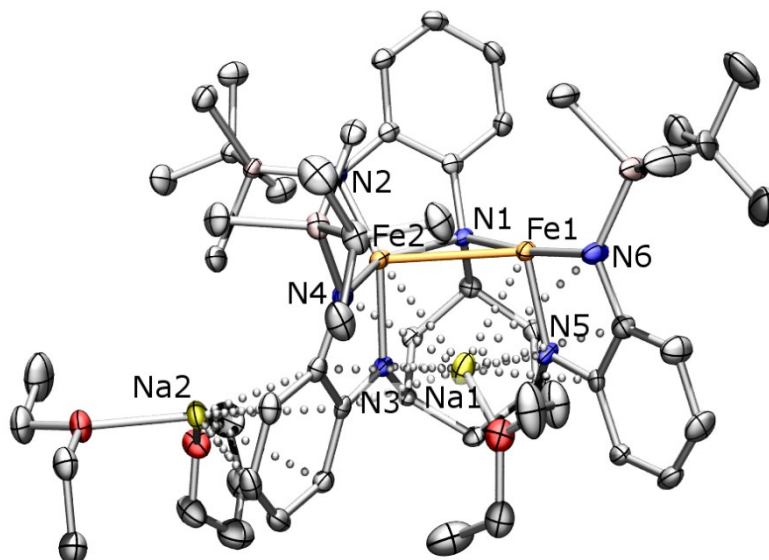

**Figure S35.** Solid state structure of  $[\text{Na}(\text{thf})(\text{OEt}_2)][(\text{tbsL})\text{Fe}_2\text{Na}(\text{OEt}_2)]$  (**4**). Hydrogen atoms have been omitted for clarity. Only one part of the disorder is depicted for clarity.

**Table S6.** Selected bond metrics for **4** (Å).

|         |           |        |          |
|---------|-----------|--------|----------|
| Fe1—Fe2 | 2.8586(8) | Fe1—N5 | 1.939(2) |
| Fe1—Na1 | 2.997(1)  | Fe2—N1 | 2.144(2) |
| Fe2—Na1 | 3.182(1)  | Fe2—N4 | 2.058(2) |
| Fe1—N1  | 1.955(2)  | Fe2—N2 | 1.991(2) |
| Fe1—N6  | 1.945(2)  | Fe2—N3 | 1.999(2) |

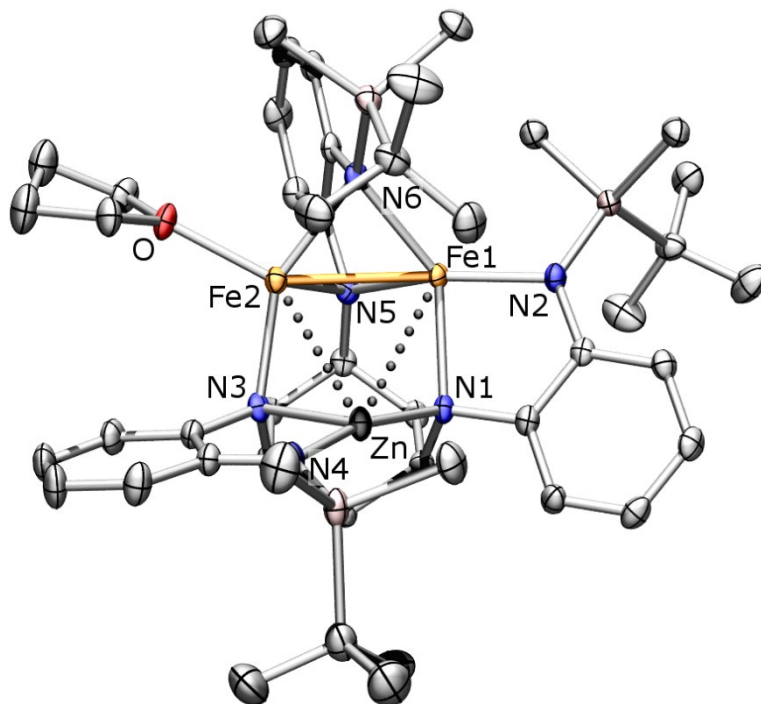

**Figure S36.** Solid state structure of  $(^{tbs}L)Fe_2Zn(thf)$  (**5**). Hydrogen atoms and hexane solvent molecule omitted for clarity.

**Table S7.** Selected bond metrics for **5** (Å).

|         |           |        |          |
|---------|-----------|--------|----------|
| Fe1—Fe2 | 2.7354(9) | Fe2—N3 | 2.007(2) |
| Zn—Fe1  | 3.1629(9) | Fe2—N5 | 2.09(3)  |
| Zn—Fe2  | 2.9399(6) | Fe2—N6 | 2.098(2) |
| Fe1—N2  | 1.950(2)  | Fe2—O  | 2.051(2) |
| Fe1—N5  | 2.030(2)  | Zn—N4  | 1.885(3) |
| Fe1—N1  | 2.132(2)  | Zn—N1  | 1.916(3) |
| Fe1—N6  | 2.142(2)  | Zn—N3  | 2.049(2) |



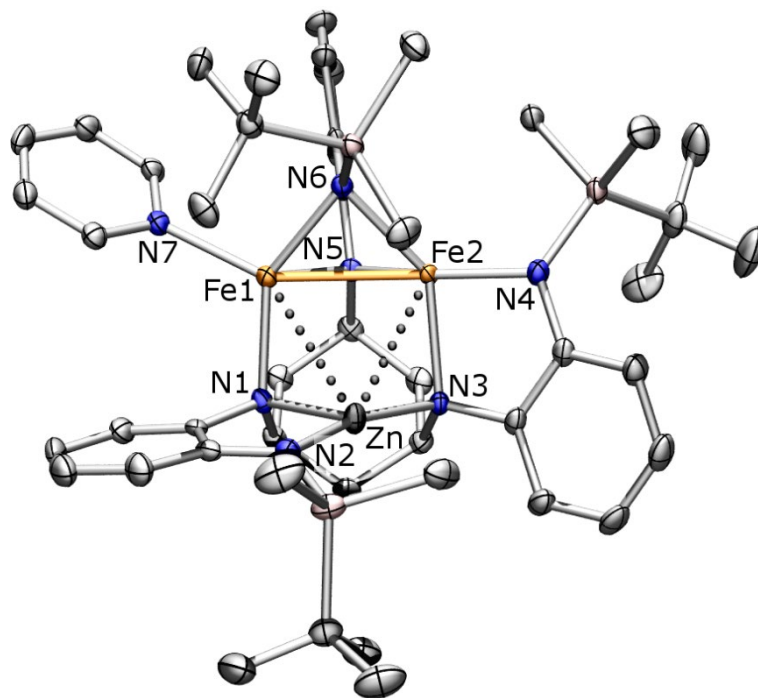

**Figure S37.** Solid state structure of  $(^{tbsL})\text{Fe}_2\text{Zn}(\text{py})$  (**6**). Hydrogen atoms and hexane solvent molecule omitted for clarity.

**Table S8.** Selected bond metrics for **6** (Å).

|         |           |        |          |
|---------|-----------|--------|----------|
| Fe1—Fe2 | 2.8141(7) | Fe2—N3 | 2.109(2) |
| Zn—Fe1  | 2.9792(6) | Fe2—N4 | 1.938(4) |
| Zn—Fe2  | 2.8939(6) | Fe2—N5 | 2.030(2) |
| Fe1—N1  | 2.021(2)  | Fe2—N6 | 2.176(3) |
| Fe1—N6  | 2.079(2)  | Zn—N2  | 1.881(2) |
| Fe1—N5  | 2.106(3)  | Zn—N3  | 1.911(3) |
| Fe1—N7  | 2.113(3)  | Zn—N1  | 2.024(3) |

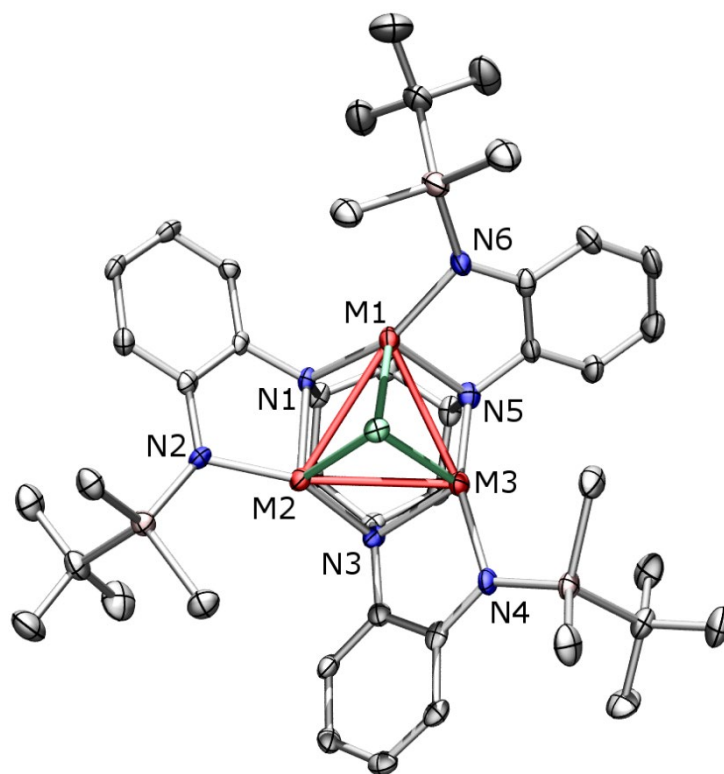

**Figure S38.** Solid state structure of  $[\text{NBu}_4][[(\text{tbsL})\text{Fe}_n\text{Zn}_{3-n}(\mu^3\text{-Cl})]$  (**9**). Hydrogen atoms and tetrabutylammonium counter ion have been omitted for clarity. Because each metal site is a mixture of Fe and Zn, the metal ions are depicted in red for generic metal M.

**Table S9.** Selected bond metrics for **9** (Å).

|        |           |                     |          |
|--------|-----------|---------------------|----------|
| M1—M2  | 2.8674(9) | M2—N2               | 1.943(3) |
| M1—M3  | 2.9830(8) | M2—N3               | 1.973(3) |
| M2—M3  | 2.9860(9) | M2—N1               | 2.107(3) |
| M1—Cl1 | 2.641(1)  | M3—N4               | 1.935(3) |
| M2—Cl1 | 2.568(1)  | M3—N5               | 1.982(3) |
| M3—Cl1 | 2.501(1)  | M3—N3               | 2.095(3) |
| M1—N6  | 1.921(3)  | M—M <sub>avg</sub>  | 2.945(1) |
| M1—N1  | 1.966(3)  | M—Cl <sub>avg</sub> | 2.570(1) |
| M1—N5  | 2.076(3)  |                     |          |

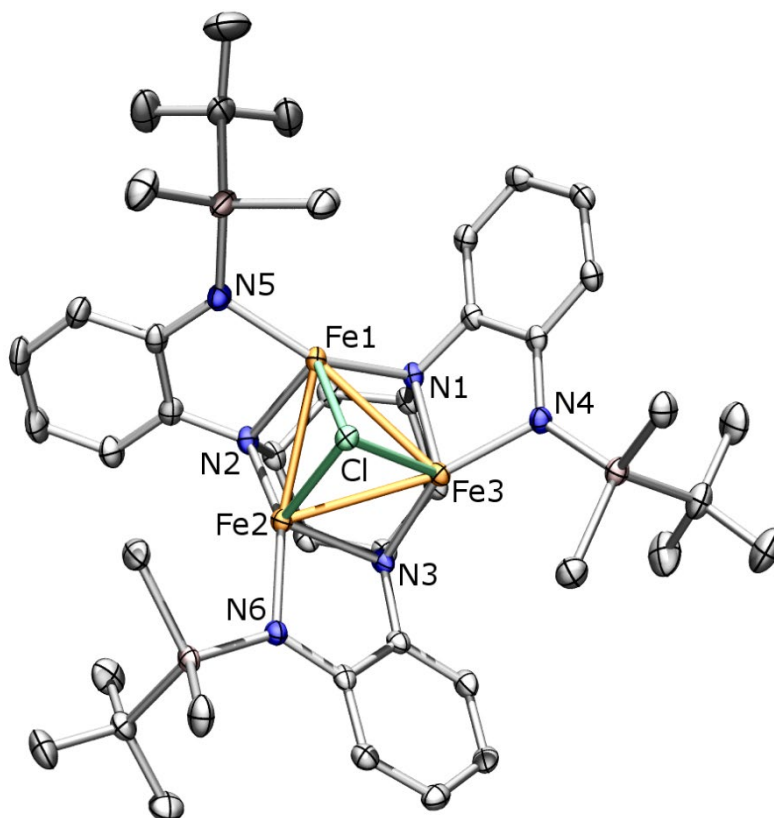

**Figure S39.** Solid state structure of  $[\text{NBu}_4][[(\text{tbsL})\text{Fe}_3(\mu^3\text{-Cl})]$  (**7**). Hydrogen atoms and tetrabutylammonium counter ion have been omitted for clarity.

**Table S10.** Selected bond metrics for **7** (Å).

|         |           |                      |          |
|---------|-----------|----------------------|----------|
| Fe1—Fe2 | 2.8061(8) | Fe2—N6               | 1.959(2) |
| Fe1—Fe3 | 2.6813(8) | Fe2—N2               | 1.989(3) |
| Fe2—Fe3 | 2.8281(8) | Fe2—N3               | 2.108(2) |
| Fe1—Cl1 | 2.5579(8) | Fe3—N4               | 1.961(3) |
| Fe2—Cl1 | 2.4785(7) | Fe3—N3               | 1.986(2) |
| Fe3—Cl1 | 2.5177(8) | Fe3—N1               | 2.112(2) |
| Fe1—N5  | 1.951(3)  | Fe—Fe <sub>avg</sub> | 2.772(1) |
| Fe1—N1  | 1.988(2)  | Fe—Cl <sub>avg</sub> | 2.518(1) |
| Fe1—N2  | 2.100(2)  |                      |          |

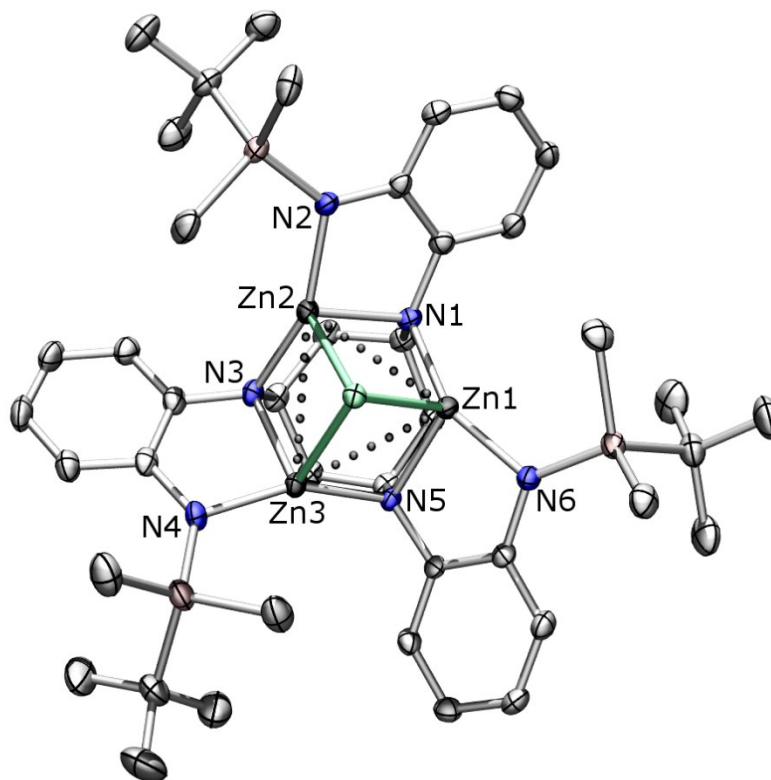

**Figure S40.** Solid state structure of  $[\text{NBu}_4][((\text{tbs})\text{L})\text{Zn}_3(\mu^3\text{-Cl})]$  (**8**). Hydrogen atoms and tetrabutylammonium chloride counter ion omitted for clarity.

**Table S11.** Selected bond metrics for **8** (Å).

|         |           |                      |          |
|---------|-----------|----------------------|----------|
| Zn1—Zn2 | 3.0176(8) | Zn2—N1               | 2.058(2) |
| Zn1—Zn3 | 2.9444(8) | Zn2—N2               | 1.916(2) |
| Zn2—Zn3 | 2.9942(8) | Zn2—N3               | 1.962(2) |
| Zn1—Cl1 | 2.6173(8) | Zn3—N4               | 1.906(2) |
| Zn2—Cl1 | 2.5016(7) | Zn3—N5               | 1.949(2) |
| Zn3—Cl1 | 2.6209(8) | Zn3—N3               | 2.046(2) |
| Zn1—N6  | 1.910(2)  | Zn—Zn <sub>avg</sub> | 2.985(1) |
| Zn1—N1  | 1.949(2)  | Zn—Cl <sub>avg</sub> | 2.579(1) |
| Zn1—N5  | 2.062(2)  |                      |          |

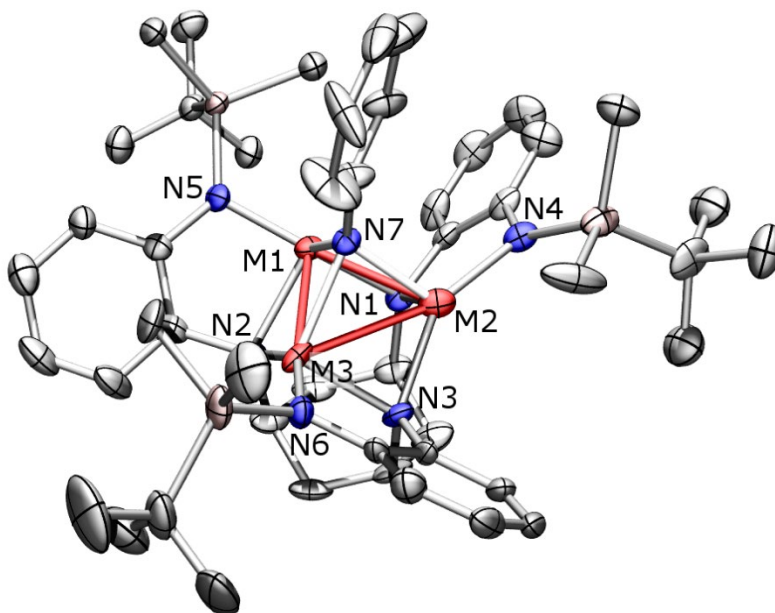

**Figure S41.** Solid state structure of  $(^{tbs}L)Fe_2Zn(\mu^3-NPh)$  (**11**). Hydrogen atoms have been omitted for clarity. Only one part of the disorder is depicted for clarity. Because each metal site is a mixture of Fe and Zn, the metal ions are depicted in red for generic metal M.

**Table S12.** Selected bond metrics for **11** (Å).

|       |           |                     |          |
|-------|-----------|---------------------|----------|
| M1—M2 | 2.725(1)  | M2—N1               | 2.056(4) |
| M1—M3 | 2.678(1)  | M2—N3               | 1.995(4) |
| M2—M3 | 2.7010(9) | M2—N4               | 1.888(4) |
| M1—N7 | 2.004(4)  | M3—N2               | 2.004(4) |
| M2—N7 | 2.060(4)  | M3—N3               | 2.056(4) |
| M3—N7 | 1.968(4)  | M3—N6               | 1.902(4) |
| M1—N5 | 1.893(5)  | M—M <sub>avg</sub>  | 2.701(2) |
| M1—N1 | 1.975(5)  | M—N7 <sub>avg</sub> | 2.011(7) |
| M1—N2 | 2.042(4)  |                     |          |

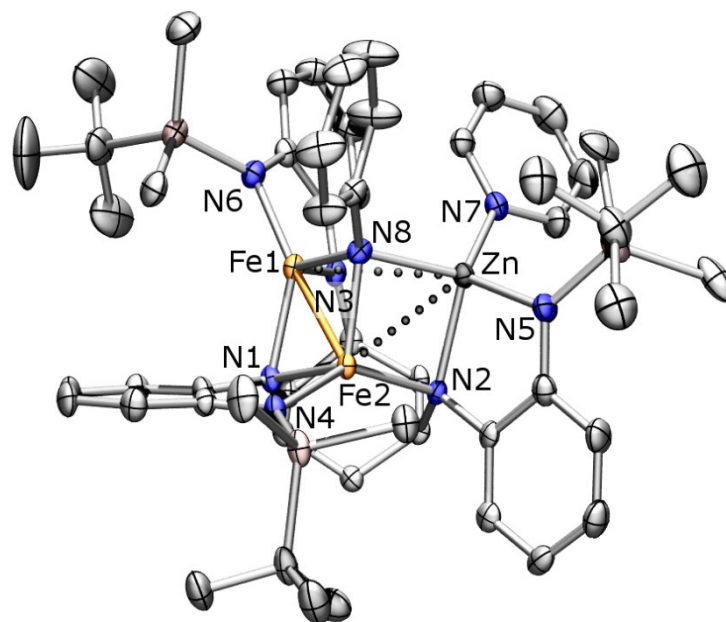

**Figure S42.** Solid state structure of  $(^{tbs}L)Fe_2Zn((\mu^3-NPh)(py))$  (**12**). Hydrogen atoms have been omitted for clarity. Only one part of the disorder is depicted for clarity.

**Table S13.** Selected bond metrics for **12** (Å).

|         |           |        |          |
|---------|-----------|--------|----------|
| Fe1—Fe2 | 2.4880(6) | Fe1—N6 | 1.917(3) |
| Fe1—Zn  | 3.2059(7) | Fe2—N1 | 2.014(2) |
| Fe2—Zn  | 2.7599(6) | Fe2—N2 | 2.025(3) |
| Fe1—N8  | 1.917(2)  | Fe2—N4 | 1.934(3) |
| Fe2—N8  | 1.961(2)  | Zn—N2  | 2.083(2) |
| Zn—N8   | 2.077(3)  | Zn—N5  | 1.957(3) |
| Fe1—N1  | 1.992(2)  | Zn—N7  | 2.039(3) |
| Fe1—N3  | 1.924(3)  |        |          |

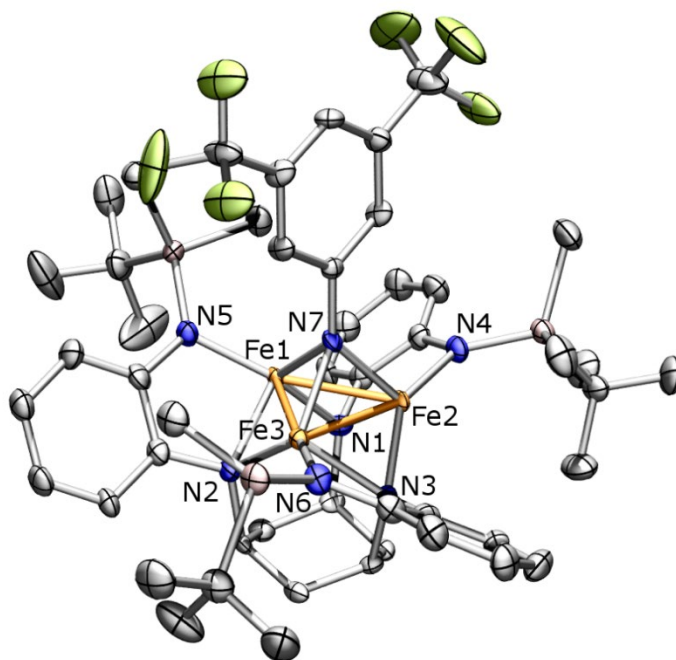

**Figure S43.** Solid state structure of  $(^{tbs}L)Fe_3(\mu^3-N(3,5-(CF_3)_2C_6H_3))$  (**13**). Hydrogen atoms have been omitted for clarity. Only one part of the disorder is depicted for clarity.

**Table S14.** Selected bond metrics for **13** (Å).<sup>a</sup>

|         |          |                      |          |
|---------|----------|----------------------|----------|
| Fe1—Fe2 | 2.457(2) | Fe2—N1               | 2.026(5) |
| Fe1—Fe3 | 2.668(2) | Fe2—N3               | 1.923(5) |
| Fe2—Fe3 | 2.520(2) | Fe2—N4               | 1.887(5) |
| Fe1—N7  | 1.977(5) | Fe3—N2               | 1.994(5) |
| Fe2—N7  | 1.931(5) | Fe3—N3               | 2.051(5) |
| Fe3—N7  | 1.972(5) | Fe3—N6               | 1.919(5) |
| Fe1—N1  | 2.020(5) | Fe—Fe <sub>avg</sub> | 2.548(3) |
| Fe1—N2  | 2.081(5) | Fe—N7 <sub>avg</sub> | 1.960(9) |
| Fe1—N5  | 1.929(5) |                      |          |

<sup>a</sup> Listed bond metrics are for the Fe centers with >90% occupancy

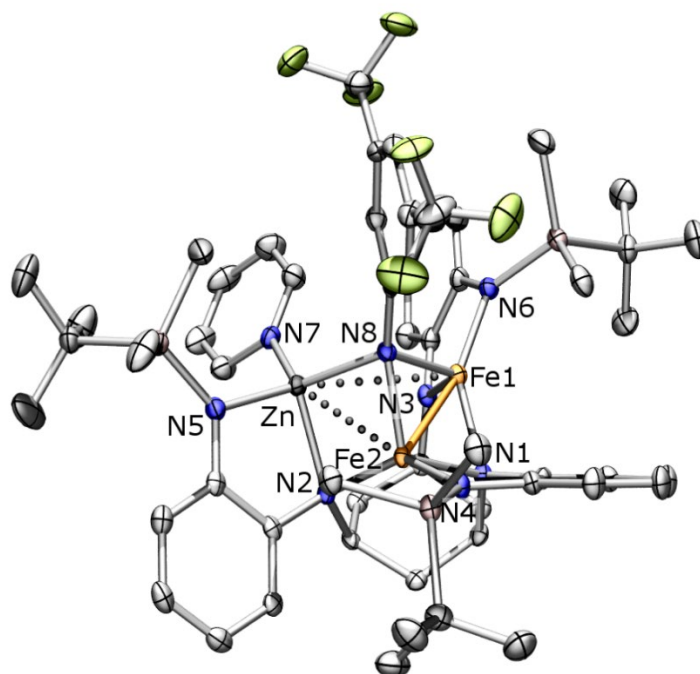

**Figure S44.** Solid state structure of  $(^{tbs}L)Fe_2Zn(\mu^3-N(3,5-(CF_3)_2C_6H_3))(py)$  (**14**). Hydrogen atoms have been omitted for clarity. Only one part of the disorder is depicted for clarity.

**Table S15.** Selected bond metrics for **14** (Å).

|         |           |        |          |
|---------|-----------|--------|----------|
| Fe1—Fe2 | 2.5008(6) | Fe1—N6 | 1.914(2) |
| Fe1—Zn  | 3.1982(6) | Fe2—N1 | 2.021(2) |
| Fe2—Zn  | 2.7806(4) | Fe2—N2 | 2.030(2) |
| Fe1—N8  | 1.932(2)  | Fe2—N4 | 1.925(2) |
| Fe2—N8  | 1.976(2)  | Zn—N2  | 2.089(2) |
| Zn—N8   | 2.084(2)  | Zn—N5  | 1.959(2) |
| Fe1—N1  | 1.973(2)  | Zn—N7  | 2.060(2) |
| Fe1—N3  | 1.922(2)  |        |          |



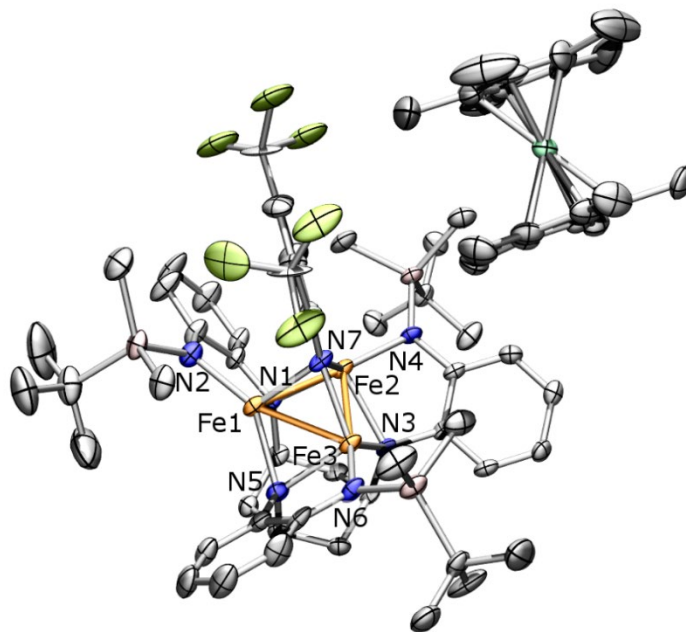

**Figure S45.** Solid state structure of  $[\text{CoCp}^*_2][(\text{tbsL})\text{Fe}_3(\mu^3\text{-N}(3,5\text{-}(\text{CF}_3)_2\text{C}_6\text{H}_3))]$  (**15**). Hydrogen atoms have been omitted for clarity. Only one part of the disorder is depicted for clarity.

**Table S16.** Selected bond metrics for **15** (Å).

|         |          |                      |          |
|---------|----------|----------------------|----------|
| Fe1—Fe2 | 2.532(1) | Fe2—N1               | 2.002(5) |
| Fe1—Fe3 | 2.632(1) | Fe2—N3               | 2.065(4) |
| Fe2—Fe3 | 2.596(1) | Fe2—N4               | 1.933(5) |
| Fe1—N7  | 1.953(5) | Fe3—N3               | 2.010(4) |
| Fe2—N7  | 1.978(4) | Fe3—N5               | 2.076(5) |
| Fe3—N7  | 1.996(4) | Fe3—N6               | 1.953(5) |
| Fe1—N1  | 2.068(5) | Fe—Fe <sub>avg</sub> | 2.587(1) |
| Fe1—N2  | 1.957(4) | Fe—N7 <sub>avg</sub> | 1.976(7) |
| Fe1—N5  | 2.013(4) |                      |          |

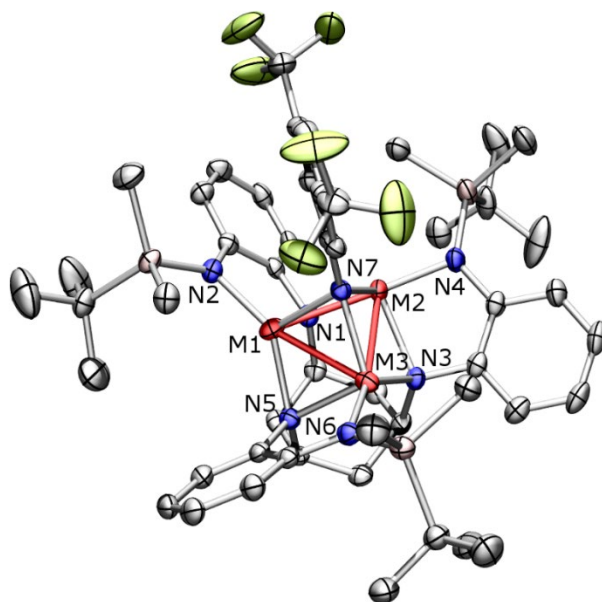

**Figure S46.** Solid state structure of  $[2,2,2\text{-cryptand}(\text{K})][(\text{tbsL})\text{Fe}_2\text{Zn}(\mu^3\text{-N}(3,5\text{-}(\text{CF}_3)_2\text{C}_6\text{H}_3))]$  (**16**). Hydrogen atoms, disordered solvent molecules, and counter ion have been omitted for clarity. Only one cluster from the unit cell is depicted. Because each metal site is a mixture of Fe and Zn, the metal ions are depicted in red for generic metal M.

**Table S17.** Selected bond metrics for two clusters (A and B) in unit cell of **16** (Å).

|                                     |           |                                     |           |
|-------------------------------------|-----------|-------------------------------------|-----------|
| M1 <sub>A</sub> —M2 <sub>A</sub>    | 2.7085(7) | M1 <sub>B</sub> —M2 <sub>B</sub>    | 2.7650(7) |
| M1 <sub>A</sub> —M3 <sub>A</sub>    | 2.6751(8) | M1 <sub>B</sub> —M3 <sub>B</sub>    | 2.6660(7) |
| M2 <sub>A</sub> —M3 <sub>A</sub>    | 2.7843(6) | M2 <sub>B</sub> —M3 <sub>B</sub>    | 2.6918(9) |
| M1 <sub>A</sub> —N7 <sub>A</sub>    | 2.032(3)  | M1 <sub>B</sub> —N7 <sub>B</sub>    | 2.014(2)  |
| M2 <sub>A</sub> —N7 <sub>A</sub>    | 2.035(3)  | M2 <sub>B</sub> —N7 <sub>B</sub>    | 2.101(3)  |
| M3 <sub>A</sub> —N7 <sub>A</sub>    | 2.010(2)  | M3 <sub>B</sub> —N7 <sub>B</sub>    | 1.967(3)  |
| M1 <sub>A</sub> —N1 <sub>A</sub>    | 2.062(3)  | M1 <sub>B</sub> —N1 <sub>B</sub>    | 2.006(3)  |
| M1 <sub>A</sub> —N5 <sub>A</sub>    | 1.974(2)  | M1 <sub>B</sub> —N5 <sub>B</sub>    | 2.085(3)  |
| M1 <sub>A</sub> —N2 <sub>A</sub>    | 1.923(3)  | M1 <sub>B</sub> —N2 <sub>B</sub>    | 1.926(3)  |
| M2 <sub>A</sub> —N1 <sub>A</sub>    | 2.015(3)  | M2 <sub>B</sub> —N1 <sub>B</sub>    | 2.090(2)  |
| M2 <sub>A</sub> —N3 <sub>A</sub>    | 2.104(2)  | M2 <sub>B</sub> —N3 <sub>B</sub>    | 1.974(3)  |
| M2 <sub>A</sub> —N4 <sub>A</sub>    | 1.939(3)  | M2 <sub>B</sub> —N4 <sub>B</sub>    | 1.910(4)  |
| M3 <sub>A</sub> —N3 <sub>A</sub>    | 2.008(3)  | M3 <sub>B</sub> —N3 <sub>B</sub>    | 2.096(3)  |
| M3 <sub>A</sub> —N5 <sub>A</sub>    | 2.104(3)  | M3 <sub>B</sub> —N5 <sub>B</sub>    | 2.011(3)  |
| M3 <sub>A</sub> —N6 <sub>A</sub>    | 1.935(3)  | M3 <sub>B</sub> —N6 <sub>B</sub>    | 1.935(3)  |
| M <sub>A</sub> —M <sub>A</sub> avg  | 2.723(1)  | M <sub>B</sub> —M <sub>B</sub> avg  | 2.708(1)  |
| M <sub>A</sub> —N7 <sub>A</sub> avg | 2.026(5)  | M <sub>B</sub> —N7 <sub>B</sub> avg | 2.027(5)  |

## References

- 1 a) Powers, T.M.; Fout, A.R.; Zheng, S.L.; Betley, T.A. *J. Am. Chem. Soc.* **2011**, *133*, 3336-3338; b) Powers, T.M.; Betley, T.A. *J. Am. Chem. Soc.* **2013**, *135*, 12289-12296; c) Hernández Sánchez, R.; Bartholomew, A.K.; Powers, T.M.; Ménard, G.; Betley, T.A. *J. Am. Chem. Soc.* **2016**, *138*, 2235-2243.
- 2 Powers, T.M.; Gu N.X.; Fout, A.R.; Baldwin, A.M.; Hernández Sánchez, R.; Alfonso, D.M.; Chen, Y.S.; Zheng, S.L.; Betley, T.A. *J. Am. Chem. Soc.* **2013**, *135*, 14448-14458.
- 3 a) Broere, D.L.J.; Čorić, I.; Brosnahan, A.; Holland, P.L. *Inorg. Chem.* **2017**, *56*, 3140-3143. b) Bürger, H.; Sawodny, W.; Wannagat, U. *J. Organomet. Chem.* **1965**, *3*, 113-120.
- 4 Allan, J.R.; Brown, D. H.; Nuttall, R. H.; Sharp, D.W.A. *Journal of the Chemical Society A: Inorganic, Physical, Theoretical* **1966**.
- 5 Lalancet, J.-M.; Rollin, G.; Dumas, P. *Can. J. Chem.* **1972**, *50*, 3058-&.
- 6 Smith, P.A.S.; Hall, J. H. *J. Am. Chem. Soc.* **1962**, *84*, 480-485.
- 7 Laitar, D. S.; Mathison, C. J.; Davis, W. M.; Sadighi, J. P. *Inorg. Chem.* **2003**, *42*, 7354-7356.
- 8 *APEX2 Software Suite*; Bruker AXS:Madison, WI, **2014**.
- 9 Sheldrick, G. M. *Acta Cryst. Sec. C-Struct. Chem.* **2015**, *71*, 3-8.
- 10 Dolomanov, O. V.; Bourhis, L. J.; Gildea, R. J.; Howard, J. A. K.; Puschmann, H. *J Appl Cryst* **2009**, *42*, 339-341
- 11 Bain, G.A.; Berry, J.F. *J. Chem. Educ.* **2008**, *85*, 532-536.
- 12 Chilton, N. F.; Anderson, R. P.; Turner, L. D.; Soncini, A.; Murray, K. S. *J. Comput. Chem.* **2013**, *34*, 1164-1175.

## checkCIF/PLATON report

You have not supplied any structure factors. As a result the full set of tests cannot be run.

THIS REPORT IS FOR GUIDANCE ONLY. IF USED AS PART OF A REVIEW PROCEDURE FOR PUBLICATION, IT SHOULD NOT REPLACE THE EXPERTISE OF AN EXPERIENCED CRYSTALLOGRAPHIC REFEREE.

No syntax errors found.      CIF dictionary      Interpreting this report

### Datablock: 2

---

|                        |                                    |                                    |             |
|------------------------|------------------------------------|------------------------------------|-------------|
| Bond precision:        | C-C = 0.0041 A                     | Wavelength=0.41328                 |             |
| Cell:                  | a=10.4451(12)                      | b=27.261(3)                        | c=21.186(3) |
|                        | alpha=90                           | beta=102.166(4)                    | gamma=90    |
| Temperature:           | 100 K                              |                                    |             |
|                        | Calculated                         | Reported                           |             |
| Volume                 | 5897.1(13)                         | 5897.2(12)                         |             |
| Space group            | P 21/c                             | P 1 21/c 1                         |             |
| Hall group             | -P 2ybc                            | -P 2ybc                            |             |
| Moiety formula         | 4(C47 H71 Fe3 N7 Si3), 7(C4 H10 O) | C47 H71 Fe3 N7 Si3, 1.75(C4 H10 O) |             |
| Sum formula            | C216 H354 Fe12 N28 O7 Si12         | C54 H88.50 Fe3 N7 O1.75 Si3        |             |
| Mr                     | 4462.55                            | 1115.63                            |             |
| Dx, g cm <sup>-3</sup> | 1.257                              | 1.257                              |             |
| Z                      | 1                                  | 4                                  |             |
| Mu (mm <sup>-1</sup> ) | 0.194                              | 0.165                              |             |
| F000                   | 2382.0                             | 2382.0                             |             |
| F000'                  | 2384.23                            |                                    |             |
| h, k, lmax             |                                    | 13, 34, 26                         |             |
| Nref                   |                                    | 12080                              |             |
| Tmin, Tmax             | 0.978, 0.993                       | 0.673, 0.744                       |             |
| Tmin'                  | 0.969                              |                                    |             |

Correction method= # Reported T Limits: Tmin=0.673 Tmax=0.744  
AbsCorr = MULTI-SCAN

Data completeness=      Theta(max)= 14.997

R(reflections)= 0.0421( 9217)      wR2(reflections)=  
0.1073( 12080)

S = 1.042      Npar= 745

---

The following ALERTS were generated. Each ALERT has the format  
**test-name\_ALERT\_alert-type\_alert-level.**

Click on the hyperlinks for more details of the test.

---

● **Alert level C**

PLAT042\_ALERT\_1\_C Calc. and Reported MoietyFormula Strings Differ Please Check  
Calc.: 4(C47 H71 Fe3 N7 Si3), 7(C4 H10 O)  
Rep.: C47 H71 Fe3 N7 Si3, 1.75(C4 H10 O)

---

● **Alert level G**

ABSMU01\_ALERT\_1\_G Calculation of \_exptl\_absorpt\_correction\_mu  
not performed for this radiation type.

PLAT002\_ALERT\_2\_G Number of Distance or Angle Restraints on AtSite 15 Note  
PLAT003\_ALERT\_2\_G Number of Uiso or Uij Restrained non-H Atoms ... 20 Report  
PLAT045\_ALERT\_1\_G Calculated and Reported Z Differ by a Factor ... 0.250 Check  
PLAT092\_ALERT\_4\_G Check: Wavelength Given is not Cu,Ga,Mo,Ag,In Ka 0.41328 Ang.  
PLAT175\_ALERT\_4\_G The CIF-Embedded .res File Contains SAME Records 3 Report  
PLAT178\_ALERT\_4\_G The CIF-Embedded .res File Contains SIMU Records 1 Report  
PLAT302\_ALERT\_4\_G Anion/Solvent/Minor-Residue Disorder (Resd 2 ) 100% Note  
PLAT302\_ALERT\_4\_G Anion/Solvent/Minor-Residue Disorder (Resd 3 ) 100% Note  
PLAT302\_ALERT\_4\_G Anion/Solvent/Minor-Residue Disorder (Resd 4 ) 100% Note  
PLAT302\_ALERT\_4\_G Anion/Solvent/Minor-Residue Disorder (Resd 5 ) 100% Note  
PLAT304\_ALERT\_4\_G Non-Integer Number of Atoms in ..... (Resd 2 ) 7.58 Check  
PLAT304\_ALERT\_4\_G Non-Integer Number of Atoms in ..... (Resd 3 ) 7.21 Check  
PLAT304\_ALERT\_4\_G Non-Integer Number of Atoms in ..... (Resd 4 ) 7.42 Check  
PLAT304\_ALERT\_4\_G Non-Integer Number of Atoms in ..... (Resd 5 ) 4.04 Check  
PLAT720\_ALERT\_4\_G Number of Unusual/Non-Standard Labels ..... 23 Note  
H1SA H1SB H1SC H2SA H2SB H3SA H3SB H4SA  
H4SB H4SC H5SA H5SB H5SC H6SA H6SB H7SA  
H7SB H8SA H8SB H8SC H9SA H9SB H9SC

PLAT789\_ALERT\_4\_G Atoms with Negative \_atom\_site\_disorder\_group # 60 Check  
PLAT790\_ALERT\_4\_G Centre of Gravity not Within Unit Cell: Resd. # 3 Note  
C4 H10 O  
PLAT790\_ALERT\_4\_G Centre of Gravity not Within Unit Cell: Resd. # 5 Note  
C4 H10 O  
PLAT822\_ALERT\_4\_G CIF-embedded .res Contains Negative PART Numbers 4 Check  
PLAT860\_ALERT\_3\_G Number of Least-Squares Restraints ..... 264 Note  
PLAT883\_ALERT\_1\_G No Info/Value for \_atom\_sites\_solution\_primary . Please Do !  
PLAT933\_ALERT\_2\_G Number of HKL-OMIT Records in Embedded .res File 7 Note  
1 0 0, 0 1 1, 0 1 2, 0 2 0, -1 1 1, 1 1 0,  
-1 0 2,

---

0 **ALERT level A** = Most likely a serious problem - resolve or explain  
0 **ALERT level B** = A potentially serious problem, consider carefully  
1 **ALERT level C** = Check. Ensure it is not caused by an omission or oversight  
23 **ALERT level G** = General information/check it is not something unexpected

4 ALERT type 1 CIF construction/syntax error, inconsistent or missing data  
3 ALERT type 2 Indicator that the structure model may be wrong or deficient  
1 ALERT type 3 Indicator that the structure quality may be low  
16 ALERT type 4 Improvement, methodology, query or suggestion  
0 ALERT type 5 Informative message, check

---

## Datablock: 4

---

Bond precision: C-C = 0.0037 Å Wavelength=0.71073  
Cell: a=11.040(2) b=14.175(3) c=21.290(5)  
alpha=106.479(4) beta=93.058(4) gamma=106.770(4)  
Temperature: 100 K

|                        | Calculated                                     | Reported                         |
|------------------------|------------------------------------------------|----------------------------------|
| Volume                 | 3025.6(11)                                     | 3025.6(11)                       |
| Space group            | P -1                                           | P -1                             |
| Hall group             | -P 1                                           | -P 1                             |
| Moiety formula         | C46 H75.24 Fe2 N6 Na O Si3,<br>C8 H19.72 Na O2 | C54 H94.963 Fe2 N6 Na2 O3<br>Si3 |
| Sum formula            | C54 H94.96 Fe2 N6 Na2 O3<br>Si3                | C54 H94.96 Fe2 N6 Na2 O3<br>Si3  |
| Mr                     | 1118.27                                        | 1118.27                          |
| Dx, g cm <sup>-3</sup> | 1.227                                          | 1.227                            |
| Z                      | 2                                              | 2                                |
| Mu (mm <sup>-1</sup> ) | 0.597                                          | 0.597                            |
| F000                   | 1201.9                                         | 1202.0                           |
| F000'                  | 1204.20                                        |                                  |
| h, k, lmax             |                                                | 13, 17, 25                       |
| Nref                   |                                                | 11243                            |
| Tmin, Tmax             | 0.867, 0.942                                   | 0.696, 0.745                     |
| Tmin'                  | 0.836                                          |                                  |

Correction method= # Reported T Limits: Tmin=0.696 Tmax=0.745  
AbsCorr = MULTI-SCAN

Data completeness= Theta(max)= 25.709

R(reflections)= 0.0396( 8448) wR2(reflections)=  
0.0926( 11243)  
S = 1.015 Npar= 728

---

The following ALERTS were generated. Each ALERT has the format  
**test-name\_ALERT\_alert-type\_alert-level.**  
Click on the hyperlinks for more details of the test.

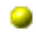

### Alert level C

PLAT042\_ALERT\_1\_C Calc. and Reported MoietyFormula Strings Differ Please Check  
Calc: C46 H75.24 Fe2 N6 Na O Si3, C8 H19.72 Na O2  
Rep.: C54 H94.963 Fe2 N6 Na2 O3 Si3

|                   |                                                  |      |        |
|-------------------|--------------------------------------------------|------|--------|
| PLAT094_ALERT_2_C | Ratio of Maximum / Minimum Residual Density .... | 2.33 | Report |
| PLAT220_ALERT_2_C | NonSolvent Resd 1 C Ueq(max)/Ueq(min) Range      | 3.9  | Ratio  |
| PLAT222_ALERT_3_C | NonSolvent Resd 1 H Uiso(max)/Uiso(min) Range    | 5.0  | Ratio  |
| PLAT230_ALERT_2_C | Hirshfeld Test Diff for Si2 --C25 .              | 5.3  | s.u.   |

---

### Alert level G

|                   |                                                  |        |             |
|-------------------|--------------------------------------------------|--------|-------------|
| PLAT002_ALERT_2_G | Number of Distance or Angle Restraints on AtSite | 8      | Note        |
| PLAT154_ALERT_1_G | The s.u.'s on the Cell Angles are Equal ..(Note) | 0.004  | Degree      |
| PLAT171_ALERT_4_G | The CIF-Embedded .res File Contains EADP Records | 21     | Report      |
| PLAT175_ALERT_4_G | The CIF-Embedded .res File Contains SAME Records | 1      | Report      |
| PLAT180_ALERT_4_G | Check Cell Rounding: # of Values Ending with 0 = | 3      | Note        |
| PLAT230_ALERT_2_G | Hirshfeld Test Diff for C43 --C44 .              | 7.7    | s.u.        |
| PLAT232_ALERT_2_G | Hirshfeld Test Diff (M-X) Na2 --O3A .            | 6.9    | s.u.        |
| PLAT301_ALERT_3_G | Main Residue Disorder .....(Resd 1 )             | 27%    | Note        |
| PLAT302_ALERT_4_G | Anion/Solvent/Minor-Residue Disorder (Resd 2 )   | 45%    | Note        |
| PLAT304_ALERT_4_G | Non-Integer Number of Atoms in ..... (Resd 1 )   | 134.24 | Check       |
| PLAT304_ALERT_4_G | Non-Integer Number of Atoms in ..... (Resd 2 )   | 30.72  | Check       |
| PLAT412_ALERT_2_G | Short Intra XH3 .. XHn H13C ..H40E .             | 1.90   | Ang.        |
|                   | x,y,z =                                          | 1_555  | Check       |
| PLAT412_ALERT_2_G | Short Intra XH3 .. XHn H14C ..H17A .             | 1.95   | Ang.        |
|                   | x,y,z =                                          | 1_555  | Check       |
| PLAT764_ALERT_4_G | Overcomplete CIF Bond List Detected (Rep/Expd) . | 1.13   | Ratio       |
| PLAT811_ALERT_5_G | No ADDSYM Analysis: Too Many Excluded Atoms .... | !      | Info        |
| PLAT860_ALERT_3_G | Number of Least-Squares Restraints .....         | 6      | Note        |
| PLAT883_ALERT_1_G | No Info/Value for _atom_sites_solution_primary . |        | Please Do ! |
| PLAT941_ALERT_3_G | Average HKL Measurement Multiplicity .....       | 2.3    | Low         |

---

0 **ALERT level A** = Most likely a serious problem - resolve or explain  
0 **ALERT level B** = A potentially serious problem, consider carefully  
5 **ALERT level C** = Check. Ensure it is not caused by an omission or oversight  
18 **ALERT level G** = General information/check it is not something unexpected

3 ALERT type 1 CIF construction/syntax error, inconsistent or missing data  
8 ALERT type 2 Indicator that the structure model may be wrong or deficient  
4 ALERT type 3 Indicator that the structure quality may be low  
7 ALERT type 4 Improvement, methodology, query or suggestion  
1 ALERT type 5 Informative message, check

---

## Datablock: 5

---

|                 |                |                    |              |
|-----------------|----------------|--------------------|--------------|
| Bond precision: | C-C = 0.0047 A | Wavelength=0.40659 |              |
| Cell:           | a=10.3835 (18) | b=18.015 (2)       | c=30.663 (7) |
|                 | alpha=90       | beta=91.703 (6)    | gamma=90     |
| Temperature:    | 100 K          |                    |              |

|                        | Calculated                                     | Reported                           |
|------------------------|------------------------------------------------|------------------------------------|
| Volume                 | 5733.3(18)                                     | 5733.3(17)                         |
| Space group            | P 21/n                                         | P 1 21/n 1                         |
| Hall group             | -P 2yn                                         | -P 2yn                             |
| Moiety formula         | C46 H74 Fe2 N6 O Si3 Zn, C6<br>H14 [+ solvent] | C46 H74 Fe2 N6 O Si3 Zn, C6<br>H14 |
| Sum formula            | C52 H88 Fe2 N6 O Si3 Zn [+<br>solvent]         | C52 H88 Fe2 N6 O Si3 Zn            |
| Mr                     | 1074.64                                        | 1074.62                            |
| Dx, g cm <sup>-3</sup> | 1.245                                          | 1.245                              |
| Z                      | 4                                              | 4                                  |
| Mu (mm <sup>-1</sup> ) | 0.226                                          | 0.507                              |
| F000                   | 2296.0                                         | 2296.0                             |
| F000'                  | 2298.39                                        |                                    |
| h, k, lmax             |                                                | 14, 25, 43                         |
| Nref                   |                                                | 17045                              |
| Tmin, Tmax             | 0.952, 0.990                                   | 0.628, 0.719                       |
| Tmin'                  | 0.931                                          |                                    |

Correction method= # Reported T Limits: Tmin=0.628 Tmax=0.719  
AbsCorr = MULTI-SCAN

Data completeness= Theta(max)= 16.741

R(reflections)= 0.0593( 10447)

wR2(reflections)=  
0.1480( 17045)

S = 1.015

Npar= 603

The following ALERTS were generated. Each ALERT has the format  
**test-name\_ALERT\_alert-type\_alert-level.**  
Click on the hyperlinks for more details of the test.

### Alert level C

RINTA01\_ALERT\_3\_C The value of Rint is greater than 0.12  
Rint given 0.120

### Alert level G

ABSMU01\_ALERT\_1\_G Calculation of \_exptl\_absorpt\_correction\_mu  
not performed for this radiation type.

|                                                                    |         |             |
|--------------------------------------------------------------------|---------|-------------|
| PLAT020_ALERT_3_G The Value of Rint is Greater Than 0.12 .....     | 0.120   | Report      |
| PLAT051_ALERT_1_G Mu(calc) and Mu(CIF) Ratio Differs from 1.0 by . | 55.34   | %           |
| PLAT092_ALERT_4_G Check: Wavelength Given is not Cu,Ga,Mo,Ag,In Ka | 0.40659 | Ang.        |
| PLAT605_ALERT_4_G Largest Solvent Accessible VOID in the Structure | 202     | A**3        |
| PLAT794_ALERT_5_G Tentative Bond Valency for Zn1 (II) .            | 1.64    | Info        |
| PLAT869_ALERT_4_G ALERTS Related to the Use of SQUEEZE Suppressed  |         | ! Info      |
| PLAT883_ALERT_1_G No Info/Value for _atom_sites_solution_primary . |         | Please Do ! |



PLAT933\_ALERT\_2\_G Number of HKL-OMIT Records in Embedded .res File 5 Note  
 1 2 2, 2 3 2, 0 5 3, 0 3 2, 0 6 4,  
 PLAT941\_ALERT\_3\_G Average HKL Measurement Multiplicity ..... 4.5 Low  
 PLAT984\_ALERT\_1\_G The Fe-f' = 0.2886 Deviates from the B&C-Value 0.1938 Check  
 PLAT984\_ALERT\_1\_G The Si-f' = 0.0522 Deviates from the B&C-Value 0.0258 Check  
 PLAT984\_ALERT\_1\_G The Zn-f' = 0.3242 Deviates from the B&C-Value 0.2556 Check  
 PLAT985\_ALERT\_1\_G The Fe-f" = 0.5448 Deviates from the B&C-Value 0.2969 Check  
 PLAT985\_ALERT\_1\_G The Si-f" = 0.0431 Deviates from the B&C-Value 0.0221 Check  
 PLAT985\_ALERT\_1\_G The Zn-f" = 0.9375 Deviates from the B&C-Value 0.5209 Check

---

0 **ALERT level A** = Most likely a serious problem - resolve or explain  
 0 **ALERT level B** = A potentially serious problem, consider carefully  
 1 **ALERT level C** = Check. Ensure it is not caused by an omission or oversight  
 16 **ALERT level G** = General information/check it is not something unexpected

9 ALERT type 1 CIF construction/syntax error, inconsistent or missing data  
 1 ALERT type 2 Indicator that the structure model may be wrong or deficient  
 3 ALERT type 3 Indicator that the structure quality may be low  
 3 ALERT type 4 Improvement, methodology, query or suggestion  
 1 ALERT type 5 Informative message, check

---

## Datablock: 6

---

Bond precision: C-C = 0.0056 A

Wavelength=0.40651

Cell: a=10.6298(8) b=11.1655(9) c=23.6682(18)  
 alpha=98.248(2) beta=101.941(2) gamma=101.506(2)  
 Temperature: 100 K

|                        | Calculated                            | Reported                        |
|------------------------|---------------------------------------|---------------------------------|
| Volume                 | 2642.6(4)                             | 2642.6(4)                       |
| Space group            | P -1                                  | P -1                            |
| Hall group             | -P 1                                  | -P 1                            |
| Moiety formula         | C47 H71 Fe2 N7 Si3 Zn,<br>0.5(C6 H14) | C47 H71 Fe2 N7 Si3 Zn, C3<br>H7 |
| Sum formula            | C50 H78 Fe2 N7 Si3 Zn                 | C50 H78 Fe2 N7 Si3 Zn           |
| Mr                     | 1038.55                               | 1038.53                         |
| Dx, g cm <sup>-3</sup> | 1.305                                 | 1.305                           |
| Z                      | 2                                     | 2                               |
| Mu (mm <sup>-1</sup> ) | 0.244                                 | 0.213                           |
| F000                   | 1102.0                                | 1102.0                          |
| F000'                  | 1103.19                               |                                 |
| h, k, lmax             |                                       | 12, 13, 28                      |
| Nref                   |                                       | 8937                            |
| Tmin, Tmax             | 0.985, 0.996                          | 0.633, 0.744                    |
| Tmin'                  | 0.964                                 |                                 |

Correction method= # Reported T Limits: Tmin=0.633 Tmax=0.744  
AbsCorr = MULTI-SCAN

Data completeness= Theta(max)= 14.031

R(reflections)= 0.0441( 7925)

wR2(reflections)=  
0.1106( 8937)

S = 1.094

Npar= 584

---

The following ALERTS were generated. Each ALERT has the format

**test-name\_ALERT\_alert-type\_alert-level.**

Click on the hyperlinks for more details of the test.

---

 **Alert level A**

PLAT051\_ALERT\_1\_A Mu(calc) and Mu(CIF) Ratio Differs from 1.0 by . 14.58 %

**Author Response: Structure collected with synchrotron radiation; difference in Mu(calc) from Shelx program and checkcif due to rounding errors in f', f'', and mu values.**

---

 **Alert level B**

PLAT029\_ALERT\_3\_B \_diffrn\_measured\_fraction\_theta\_full value Low . 0.950 Why?

**Author Response: Structure collected with fixed chi geometry at synchrotron source; hardware limit prevents >95% completeness.**

---

 **Alert level C**

PLAT042\_ALERT\_1\_C Calc. and Reported MoietyFormula Strings Differ Please Check

Calc: C47 H71 Fe2 N7 Si3 Zn, 0.5(C6 H14)

Rep.: C47 H71 Fe2 N7 Si3 Zn, C3 H7

PLAT094\_ALERT\_2\_C Ratio of Maximum / Minimum Residual Density .... 2.05 Report

PLAT232\_ALERT\_2\_C Hirshfeld Test Diff (M-X) Fe2 --N5 . 5.6 s.u.

---

 **Alert level G**

ABSMU01\_ALERT\_1\_G Calculation of \_exptl\_absorpt\_correction\_mu  
not performed for this radiation type.

PLAT083\_ALERT\_2\_G SHELXL Second Parameter in WGHT Unusually Large 7.03 Why ?

PLAT092\_ALERT\_4\_G Check: Wavelength Given is not Cu,Ga,Mo,Ag,In Ka 0.40651 Ang.

PLAT154\_ALERT\_1\_G The s.u.'s on the Cell Angles are Equal ..(Note) 0.002 Degree

PLAT794\_ALERT\_5\_G Tentative Bond Valency for Zn1 (II) . 1.68 Info

PLAT883\_ALERT\_1\_G No Info/Value for \_atom\_sites\_solution\_primary . Please Do !

PLAT933\_ALERT\_2\_G Number of HKL-OMIT Records in Embedded .res File 11 Note

0 0 2, 0 2 1, -1 2 2, -1 -1 3, -1 1 5, -1 -3 1,  
-1 0 4, -1 -4 3, -1 -3 3, -2 0 7, -1 -4 2,

---

1 **ALERT level A** = Most likely a serious problem - resolve or explain  
1 **ALERT level B** = A potentially serious problem, consider carefully  
3 **ALERT level C** = Check. Ensure it is not caused by an omission or oversight  
7 **ALERT level G** = General information/check it is not something unexpected

5 ALERT type 1 CIF construction/syntax error, inconsistent or missing data  
4 ALERT type 2 Indicator that the structure model may be wrong or deficient  
1 ALERT type 3 Indicator that the structure quality may be low  
1 ALERT type 4 Improvement, methodology, query or suggestion  
1 ALERT type 5 Informative message, check

---

## Datablock: 7

---

Bond precision: C-C = 0.0045 A Wavelength=0.71073

Cell: a=26.839(3) b=19.358(2) c=27.601(4)  
alpha=90 beta=90 gamma=90

Temperature: 100 K

|                        | Calculated                                      | Reported                            |
|------------------------|-------------------------------------------------|-------------------------------------|
| Volume                 | 14340(3)                                        | 14340(3)                            |
| Space group            | P b c a                                         | P b c a                             |
| Hall group             | -P 2ac 2ab                                      | -P 2ac 2ab                          |
| Moiety formula         | C42 H66 Cl Fe3 N6 Si3, C15<br>H34 N [+ solvent] | C42 H66 Cl Fe3 N6 Si3, C15<br>H34 N |
| Sum formula            | C57 H100 Cl Fe3 N7 Si3 [+<br>solvent]           | C57 H100 Cl Fe3 N7 Si3              |
| Mr                     | 1170.71                                         | 1170.70                             |
| Dx, g cm <sup>-3</sup> | 1.084                                           | 1.085                               |
| Z                      | 8                                               | 8                                   |
| Mu (mm <sup>-1</sup> ) | 0.722                                           | 0.722                               |
| F000                   | 5024.0                                          | 5024.0                              |
| F000'                  | 5036.37                                         |                                     |
| h, k, lmax             |                                                 | 32, 23, 33                          |
| Nref                   |                                                 | 13621                               |
| Tmin, Tmax             | 0.771, 0.866                                    | 0.645, 0.745                        |
| Tmin'                  | 0.749                                           |                                     |

Correction method= # Reported T Limits: Tmin=0.645 Tmax=0.745  
AbsCorr = MULTI-SCAN

Data completeness= Theta(max)= 25.694

R(reflections)= 0.0426( 11027)

wR2(reflections)=  
0.1258( 13621)

S = 1.040

Npar= 661

---

The following ALERTS were generated. Each ALERT has the format

**test-name\_ALERT\_alert-type\_alert-level.**

Click on the hyperlinks for more details of the test.

---

**Alert level B**

PLAT094\_ALERT\_2\_B Ratio of Maximum / Minimum Residual Density .... 6.63 Report

**Author Response: Remaining residual density is located next to a disordered butyl group on the tetrabutyl ammonium counterion. The large Q peak is accounted for by a failure of the disorder modeling to successfully fit all of the remaining electron density.**

PLAT097\_ALERT\_2\_B Large Reported Max. (Positive) Residual Density 3.04 eA-3

**Author Response: Remaining residual density is located next to a disordered butyl group on the tetrabutyl ammonium counterion. The large Q peak is accounted for by a failure of the disorder modeling to successfully fit all of the remaining electron density.**

---

**Alert level C**

DIFMX02\_ALERT\_1\_C The maximum difference density is > 0.1\*ZMAX\*0.75

The relevant atom site should be identified.

PLAT220\_ALERT\_2\_C NonSolvent Resd 1 C Ueq(max)/Ueq(min) Range 3.7 Ratio

PLAT222\_ALERT\_3\_C NonSolvent Resd 1 H Uiso(max)/Uiso(min) Range 4.3 Ratio

---

**Alert level G**

PLAT083\_ALERT\_2\_G SHELXL Second Parameter in WGHT Unusually Large 31.70 Why ?

PLAT171\_ALERT\_4\_G The CIF-Embedded .res File Contains EADP Records 1 Report

PLAT232\_ALERT\_2\_G Hirshfeld Test Diff (M-X) Fe1 --C11 . 6.2 s.u.

PLAT232\_ALERT\_2\_G Hirshfeld Test Diff (M-X) Fe2 --C11 . 6.0 s.u.

PLAT232\_ALERT\_2\_G Hirshfeld Test Diff (M-X) Fe3 --C11 . 7.2 s.u.

PLAT302\_ALERT\_4\_G Anion/Solvent/Minor-Residue Disorder (Resd 2 ) 13% Note

PLAT410\_ALERT\_2\_G Short Intra H...H Contact H43B ..H55C . 1.84 Ang.

x,y,z = 1\_555 Check

**Author Response: H43B and H55C are on the tetrabutyl ammonium counterion. H55C is on the butyl group which has been modeled for disorder. The short interatomic distance is a result of this modeling.**

PLAT410\_ALERT\_2\_G Short Intra H...H Contact H44B ..H54A . 2.02 Ang.  
x,y,z = 1\_555 Check

**Author Response: H43B and H55C are on the tetrabutyl ammonium counterion. H55C is on the butyl group which has been modeled for disorder. The short interatomic distance is a result of this modeling.**

PLAT410\_ALERT\_2\_G Short Intra H...H Contact H44B ..H54D . 2.09 Ang.  
x,y,z = 1\_555 Check

**Author Response: H43B and H55C are on the tetrabutyl ammonium counterion. H55C is on the butyl group which has been modeled for disorder. The short interatomic distance is a result of this modeling.**

PLAT606\_ALERT\_4\_G Solvent Accessible VOID(S) in Structure ..... ! Info  
PLAT720\_ALERT\_4\_G Number of Unusual/Non-Standard Labels ..... 3 Note  
COAA HOAA HOAB  
PLAT869\_ALERT\_4\_G ALERTS Related to the Use of SQUEEZE Suppressed ! Info  
PLAT883\_ALERT\_1\_G No Info/Value for \_atom\_sites\_solution\_primary . Please Do !

---

0 **ALERT level A** = Most likely a serious problem - resolve or explain  
2 **ALERT level B** = A potentially serious problem, consider carefully  
3 **ALERT level C** = Check. Ensure it is not caused by an omission or oversight  
13 **ALERT level G** = General information/check it is not something unexpected

2 ALERT type 1 CIF construction/syntax error, inconsistent or missing data  
10 ALERT type 2 Indicator that the structure model may be wrong or deficient  
1 ALERT type 3 Indicator that the structure quality may be low  
5 ALERT type 4 Improvement, methodology, query or suggestion  
0 ALERT type 5 Informative message, check

---

## Datablock: 8

---

Bond precision: C-C = 0.0038 A Wavelength=0.71073

Cell: a=27.1744 (9) b=19.1482 (7) c=27.5979 (10)  
alpha=90 beta=90 gamma=90

Temperature: 100 K

|                        | Calculated                                      | Reported                            |
|------------------------|-------------------------------------------------|-------------------------------------|
| Volume                 | 14360.3(9)                                      | 14360.3(9)                          |
| Space group            | P b c a                                         | P b c a                             |
| Hall group             | -P 2ac 2ab                                      | -P 2ac 2ab                          |
| Moiety formula         | C42 H66 Cl N6 Si3 Zn3, C16<br>H36 N [+ solvent] | C42 H66 Cl N6 Si3 Zn3, C16<br>H36 N |
| Sum formula            | C58 H102 Cl N7 Si3 Zn3 [+<br>solvent]           | C58 H102 Cl N7 Si3 Zn3              |
| Mr                     | 1213.36                                         | 1213.29                             |
| Dx, g cm <sup>-3</sup> | 1.122                                           | 1.122                               |
| Z                      | 8                                               | 8                                   |
| Mu (mm <sup>-1</sup> ) | 1.117                                           | 1.117                               |
| F000                   | 5184.0                                          | 5184.0                              |
| F000'                  | 5194.86                                         |                                     |
| h, k, lmax             |                                                 | 32, 22, 32                          |
| Nref                   |                                                 | 12718                               |
| Tmin, Tmax             | 0.646, 0.654                                    | 0.680, 0.745                        |
| Tmin'                  | 0.633                                           |                                     |

Correction method= # Reported T Limits: Tmin=0.680 Tmax=0.745

AbsCorr = MULTI-SCAN

Data completeness=

Theta(max)= 25.056

R(reflections)= 0.0332 ( 9744)

wR2(reflections)=  
0.0791 ( 12718)

S = 1.028

Npar= 676

The following ALERTS were generated. Each ALERT has the format

**test-name\_ALERT\_alert-type\_alert-level.**

Click on the hyperlinks for more details of the test.

### ● Alert level C

|                   |             |                           |        |                     |       |     |       |
|-------------------|-------------|---------------------------|--------|---------------------|-------|-----|-------|
| PLAT220_ALERT_2_C | NonSolvent  | Resd 1                    | C      | Ueq(max)/Ueq(min)   | Range | 3.9 | Ratio |
| PLAT222_ALERT_3_C | NonSolvent  | Resd 1                    | H      | Uiso(max)/Uiso(min) | Range | 4.1 | Ratio |
| PLAT223_ALERT_4_C | Solv./Anion | Resd 2                    | H      | Ueq(max)/Ueq(min)   | Range | 4.1 | Ratio |
| PLAT250_ALERT_2_C | Large U3/U1 | Ratio for Average U(i, j) | Tensor | ....                |       | 2.2 | Note  |

### ● Alert level G

|                   |                             |                          |                 |   |  |      |        |
|-------------------|-----------------------------|--------------------------|-----------------|---|--|------|--------|
| PLAT083_ALERT_2_G | SHELXL                      | Second Parameter in WGHT | Unusually Large |   |  | 9.88 | Why ?  |
| PLAT171_ALERT_4_G | The CIF-Embedded .res File  | Contains EADP Records    |                 |   |  | 2    | Report |
| PLAT232_ALERT_2_G | Hirshfeld Test Diff (M-X)   | Zn01                     | --C11           | . |  | 12.3 | s.u.   |
| PLAT232_ALERT_2_G | Hirshfeld Test Diff (M-X)   | Zn02                     | --C11           | . |  | 12.0 | s.u.   |
| PLAT232_ALERT_2_G | Hirshfeld Test Diff (M-X)   | Zn03                     | --C11           | . |  | 13.3 | s.u.   |
| PLAT302_ALERT_4_G | Anion/Solvent/Minor-Residue | Disorder (Resd 2 )       |                 |   |  | 12%  | Note   |

PLAT410\_ALERT\_2\_G Short Intra H...H Contact H47B ..H56C . 1.97 Ang.  
 x,y,z = 1\_555 Check  
 PLAT413\_ALERT\_2\_G Short Inter XH3 .. XHn H40C ..H57D . 1.98 Ang.  
 1-x,1-y,1-z = 5\_666 Check

**Author Response: H57D is located on a disordered butyl group on the tetrabutyl ammonium counterion. Modeling of this disorder results in unusually short interatomic distances in some cases.**

PLAT606\_ALERT\_4\_G Solvent Accessible VOID(S) in Structure ..... ! Info  
 PLAT720\_ALERT\_4\_G Number of Unusual/Non-Standard Labels ..... 3 Note  
 Zn01 Zn02 Zn03  
 PLAT794\_ALERT\_5\_G Tentative Bond Valency for Zn01 (II) . 1.73 Info  
 PLAT794\_ALERT\_5\_G Tentative Bond Valency for Zn02 (II) . 1.77 Info  
 PLAT794\_ALERT\_5\_G Tentative Bond Valency for Zn03 (II) . 1.75 Info  
 PLAT869\_ALERT\_4\_G ALERTS Related to the Use of SQUEEZE Suppressed ! Info  
 PLAT883\_ALERT\_1\_G No Info/Value for \_atom\_sites\_solution\_primary . Please Do !

---

0 **ALERT level A** = Most likely a serious problem - resolve or explain  
 0 **ALERT level B** = A potentially serious problem, consider carefully  
 4 **ALERT level C** = Check. Ensure it is not caused by an omission or oversight  
 15 **ALERT level G** = General information/check it is not something unexpected

1 ALERT type 1 CIF construction/syntax error, inconsistent or missing data  
 8 ALERT type 2 Indicator that the structure model may be wrong or deficient  
 1 ALERT type 3 Indicator that the structure quality may be low  
 6 ALERT type 4 Improvement, methodology, query or suggestion  
 3 ALERT type 5 Informative message, check

---

## Datablock: 9

---

Bond precision: C-C = 0.0062 A Wavelength=0.71073

Cell: a=27.053 (4) b=19.227 (3) c=27.643 (4)  
 alpha=90 beta=90 gamma=90

Temperature: 100 K

|                        | Calculated                                         | Reported                                |
|------------------------|----------------------------------------------------|-----------------------------------------|
| Volume                 | 14379(4)                                           | 14378(4)                                |
| Space group            | P b c a                                            | P b c a                                 |
| Hall group             | -P 2ac 2ab                                         | -P 2ac 2ab                              |
| Moiety formula         | C42 H66 Cl Fe2 N6 Si3 Zn,<br>C16 H36 N [+ solvent] | C42 H66 Cl Fe2 N6 Si3 Zn1,<br>C16 H36 N |
| Sum formula            | C58 H102 Cl Fe2 N7 Si3 Zn<br>[+ solvent]           | C58 H102 Cl Fe2 N7 Si3 Zn               |
| Mr                     | 1194.28                                            | 1194.25                                 |
| Dx, g cm <sup>-3</sup> | 1.103                                              | 1.103                                   |
| Z                      | 8                                                  | 8                                       |
| Mu (mm <sup>-1</sup> ) | 0.852                                              | 0.852                                   |
| F000                   | 5120.0                                             | 5120.0                                  |
| F000'                  | 5131.87                                            |                                         |
| h, k, lmax             |                                                    | 32, 22, 32                              |
| Nref                   |                                                    | 12755                                   |
| Tmin, Tmax             | 0.767, 0.873                                       | 0.626, 0.745                            |
| Tmin'                  | 0.755                                              |                                         |

Correction method= # Reported T Limits: Tmin=0.626 Tmax=0.745  
AbsCorr = MULTI-SCAN

Data completeness= Theta(max)= 25.103

R(reflections)= 0.0563( 8699) wR2(reflections)=  
0.1307( 12755)  
S = 1.021 Npar= 670

The following ALERTS were generated. Each ALERT has the format  
**test-name\_ALERT\_alert-type\_alert-level.**  
Click on the hyperlinks for more details of the test.

### Alert level C

RINTA01\_ALERT\_3\_C The value of Rint is greater than 0.12  
Rint given 0.151

|                                                                 |              |
|-----------------------------------------------------------------|--------------|
| PLAT220_ALERT_2_C NonSolvent Resd 1 C Ueq(max)/Ueq(min) Range   | 4.2 Ratio    |
| PLAT222_ALERT_3_C NonSolvent Resd 1 H Uiso(max)/Uiso(min) Range | 4.6 Ratio    |
| PLAT341_ALERT_3_C Low Bond Precision on C-C Bonds .....         | 0.00619 Ang. |

### Alert level G

PLAT020\_ALERT\_3\_G The Value of Rint is Greater Than 0.12 ..... 0.151 Report  
PLAT042\_ALERT\_1\_G Calc. and Reported MoietyFormula Strings Differ Please Check  
Calc: C42 H66 Cl Fe2 N6 Si3 Zn, C16 H36 N  
Rep.: C42 H66 Cl Fe2 N6 Si3 Zn1, C16 H36 N

|                                                                    |             |
|--------------------------------------------------------------------|-------------|
| PLAT083_ALERT_2_G SHELXL Second Parameter in WGHT Unusually Large  | 22.96 Why ? |
| PLAT168_ALERT_4_G The CIF-Embedded .res File Contains EXYZ Records | 3 Report    |



```

PLAT171_ALERT_4_G The CIF-Embedded .res File Contains EADP Records          5 Report
PLAT232_ALERT_2_G Hirshfeld Test Diff (M-X) Zn1      --Cl1      .      21.0 s.u.
PLAT232_ALERT_2_G Hirshfeld Test Diff (M-X) Zn2      --Cl1      .      22.5 s.u.
PLAT232_ALERT_2_G Hirshfeld Test Diff (M-X) Zn3      --Cl1      .      7.5 s.u.
PLAT232_ALERT_2_G Hirshfeld Test Diff (M-X) Fe1A     --Cl1      .      21.0 s.u.
PLAT232_ALERT_2_G Hirshfeld Test Diff (M-X) Fe2A     --Cl1      .      22.5 s.u.
PLAT232_ALERT_2_G Hirshfeld Test Diff (M-X) Fe3A     --Cl1      .      7.5 s.u.
PLAT300_ALERT_4_G Atom Site Occupancy of Zn1         Constrained at 0.3333 Check
PLAT300_ALERT_4_G Atom Site Occupancy of Zn2         Constrained at 0.3333 Check
PLAT300_ALERT_4_G Atom Site Occupancy of Zn3         Constrained at 0.3333 Check
PLAT300_ALERT_4_G Atom Site Occupancy of Fe1A        Constrained at 0.6667 Check
PLAT300_ALERT_4_G Atom Site Occupancy of Fe2A        Constrained at 0.6667 Check
PLAT300_ALERT_4_G Atom Site Occupancy of Fe3A        Constrained at 0.6667 Check
PLAT301_ALERT_3_G Main Residue Disorder .....(Resd 1 )      5% Note
PLAT302_ALERT_4_G Anion/Solvent/Minor-Residue Disorder (Resd 2 ) 12% Note
PLAT410_ALERT_2_G Short Intra H...H Contact H51A     ..H56B     .      1.99 Ang.
                                     x,y,z = 1_555 Check
PLAT606_ALERT_4_G Solvent Accessible VOID(S) in Structure ..... ! Info
PLAT720_ALERT_4_G Number of Unusual/Non-Standard Labels ..... 10 Note
      C1AA  C3AA  H3AA  H3AB  C0AA  H0AA  C2AA  H2AA
      H2AB  H2AC
PLAT869_ALERT_4_G ALERTS Related to the Use of SQUEEZE Suppressed ! Info
PLAT883_ALERT_1_G No Info/Value for _atom_sites_solution_primary . Please Do !

```

---

```

0 ALERT level A = Most likely a serious problem - resolve or explain
0 ALERT level B = A potentially serious problem, consider carefully
4 ALERT level C = Check. Ensure it is not caused by an omission or oversight
24 ALERT level G = General information/check it is not something unexpected

2 ALERT type 1 CIF construction/syntax error, inconsistent or missing data
9 ALERT type 2 Indicator that the structure model may be wrong or deficient
5 ALERT type 3 Indicator that the structure quality may be low
12 ALERT type 4 Improvement, methodology, query or suggestion
0 ALERT type 5 Informative message, check

```

---

## Datablock: 11

---

```

Bond precision:  C-C = 0.0082 A          Wavelength=0.71073

Cell:           a=22.150 (4)           b=20.383 (3)           c=26.428 (4)
                alpha=90              beta=101.975 (3)       gamma=90

Temperature:    100 K

```

|                        | Calculated                           | Reported                           |
|------------------------|--------------------------------------|------------------------------------|
| Volume                 | 11672 (3)                            | 11672 (3)                          |
| Space group            | C 2/c                                | C 1 2/c 1                          |
| Hall group             | -C 2yc                               | -C 2yc                             |
| Moiety formula         | C48 H71 Fe2 N7 Si3 Zn [+<br>solvent] | C48 H71 Fe2 N7 Si3 Zn,<br>1[C6H14] |
| Sum formula            | C48 H71 Fe2 N7 Si3 Zn [+<br>solvent] | C54 H85 Fe2 N7 Si3 Zn              |
| Mr                     | 1007.48                              | 1093.62                            |
| Dx, g cm <sup>-3</sup> | 1.147                                | 1.245                              |
| Z                      | 8                                    | 8                                  |
| Mu (mm <sup>-1</sup> ) | 0.994                                | 0.999                              |
| F000                   | 4256.0                               | 4656.0                             |
| F000'                  | 4266.50                              |                                    |
| h, k, lmax             |                                      | 26, 24, 31                         |
| Nref                   |                                      | 10413                              |
| Tmin, Tmax             | 0.787, 0.905                         | 0.647, 0.745                       |
| Tmin'                  | 0.741                                |                                    |

Correction method= # Reported T Limits: Tmin=0.647 Tmax=0.745  
AbsCorr = MULTI-SCAN

Data completeness= Theta (max)= 25.158

R(reflections)= 0.0681 ( 7862)

wR2(reflections)=  
0.1430 ( 10413)

S = 1.090

Npar= 568

The following ALERTS were generated. Each ALERT has the format  
**test-name\_ALERT\_alert-type\_alert-level.**  
Click on the hyperlinks for more details of the test.

### Alert level C

|                   |                                |                                 |        |        |
|-------------------|--------------------------------|---------------------------------|--------|--------|
| PLAT213_ALERT_2_C | Atom C45                       | has ADP max/min Ratio .....     | 3.4    | prolat |
| PLAT213_ALERT_2_C | Atom C5A                       | has ADP max/min Ratio .....     | 3.4    | prolat |
| PLAT220_ALERT_2_C | NonSolvent Resd 1 C            | Ueq(max)/Ueq(min) Range         | 4.1    | Ratio  |
| PLAT234_ALERT_4_C | Large Hirshfeld Difference C45 | --C46                           | 0.21   | Ang.   |
| PLAT241_ALERT_2_C | High 'MainMol'                 | Ueq as Compared to Neighbors of | C14    | Check  |
| PLAT242_ALERT_2_C | Low 'MainMol'                  | Ueq as Compared to Neighbors of | C27    | Check  |
| PLAT341_ALERT_3_C | Low Bond Precision on          | C-C Bonds .....                 | 0.0082 | Ang.   |

### Alert level G

FORMU01\_ALERT\_2\_G There is a discrepancy between the atom counts in the  
\_chemical\_formula\_sum and the formula from the \_atom\_site\* data.  
Atom count from \_chemical\_formula\_sum: C54 H85 Fe2 N7 Si3 Zn1  
Atom count from the \_atom\_site data: C48 H71. Fe2. N7 Si3 Zn1.0049

CELLZ01\_ALERT\_1\_G Difference between formula and atom\_site contents detected.

CELLZ01\_ALERT\_1\_G ALERT: Large difference may be due to a  
symmetry error - see SYMMG tests

From the CIF: \_cell\_formula\_units\_Z 8

From the CIF: \_chemical\_formula\_sum C54 H85 Fe2 N7 Si3 Zn

TEST: Compare cell contents of formula and atom\_site data

| atom | Z*formula | cif sites | diff   |
|------|-----------|-----------|--------|
| C    | 432.00    | 384.00    | 48.00  |
| H    | 680.00    | 568.00    | 112.00 |
| Fe   | 16.00     | 16.00     | -0.00  |
| N    | 56.00     | 56.00     | 0.00   |
| Si   | 24.00     | 24.00     | 0.00   |
| Zn   | 8.00      | 8.00      | 0.00   |

PLAT003\_ALERT\_2\_G Number of Uiso or Uij Restrained non-H Atoms ... 2 Report

PLAT041\_ALERT\_1\_G Calc. and Reported SumFormula Strings Differ Please Check

Calc: C48 H71 Fe2 N7 Si3 Zn

Rep.: C54 H85 Fe2 N7 Si3 Zn

PLAT042\_ALERT\_1\_G Calc. and Reported MoietyFormula Strings Differ Please Check

Calc: C48 H71 Fe2 N7 Si3 Zn

Rep.: C48 H71 Fe2 N7 Si3 Zn, 1[C6H14]

PLAT083\_ALERT\_2\_G SHELXL Second Parameter in WGHT Unusually Large 126.69 Why ?

PLAT168\_ALERT\_4\_G The CIF-Embedded .res File Contains EXYZ Records 5 Report

PLAT171\_ALERT\_4\_G The CIF-Embedded .res File Contains EADP Records 14 Report

PLAT186\_ALERT\_4\_G The CIF-Embedded .res File Contains ISOR Records 1 Report

PLAT232\_ALERT\_2\_G Hirshfeld Test Diff (M-X) Zn1 --N7 . 8.0 s.u.

PLAT232\_ALERT\_2\_G Hirshfeld Test Diff (M-X) Zn2 --N7 . 6.0 s.u.

PLAT232\_ALERT\_2\_G Hirshfeld Test Diff (M-X) Fe1 --N7 . 8.0 s.u.

PLAT232\_ALERT\_2\_G Hirshfeld Test Diff (M-X) Fe2 --N7 . 6.0 s.u.

PLAT300\_ALERT\_4\_G Atom Site Occupancy of Zn1 Constrained at 0.3333 Check

PLAT300\_ALERT\_4\_G Atom Site Occupancy of Zn2 Constrained at 0.3333 Check

PLAT300\_ALERT\_4\_G Atom Site Occupancy of Zn3 Constrained at 0.3333 Check

PLAT300\_ALERT\_4\_G Atom Site Occupancy of Fe1 Constrained at 0.6667 Check

PLAT300\_ALERT\_4\_G Atom Site Occupancy of Fe2 Constrained at 0.6667 Check

PLAT300\_ALERT\_4\_G Atom Site Occupancy of Fe3 Constrained at 0.6667 Check

PLAT301\_ALERT\_3\_G Main Residue Disorder .....(Resd 1 ) 23% Note

PLAT411\_ALERT\_2\_G Short Inter H...H Contact H22 ..H1A . 2.09 Ang.

1-x,y,1/2-z = 2\_655 Check

PLAT412\_ALERT\_2\_G Short Intra XH3 .. XHn H9 ..H13B . 2.13 Ang.

x,y,z = 1\_555 Check

PLAT412\_ALERT\_2\_G Short Intra XH3 .. XHn H9 ..H13B . 2.13 Ang.

x,y,z = 1\_555 Check

PLAT412\_ALERT\_2\_G Short Intra XH3 .. XHn H38A ..H48 . 2.08 Ang.

x,y,z = 1\_555 Check

PLAT606\_ALERT\_4\_G Solvent Accessible VOID(S) in Structure ..... ! Info

PLAT720\_ALERT\_4\_G Number of Unusual/Non-Standard Labels ..... 2 Note

H4AA H6AA

PLAT860\_ALERT\_3\_G Number of Least-Squares Restraints ..... 12 Note

PLAT868\_ALERT\_4\_G ALERTS Due to the Use of \_smtbx\_masks Suppressed ! Info

PLAT883\_ALERT\_1\_G No Info/Value for \_atom\_sites\_solution\_primary . Please Do !

---

0 **ALERT level A** = Most likely a serious problem - resolve or explain

0 **ALERT level B** = A potentially serious problem, consider carefully

7 **ALERT level C** = Check. Ensure it is not caused by an omission or oversight

30 **ALERT level G** = General information/check it is not something unexpected

5 ALERT type 1 CIF construction/syntax error, inconsistent or missing data  
16 ALERT type 2 Indicator that the structure model may be wrong or deficient  
3 ALERT type 3 Indicator that the structure quality may be low  
13 ALERT type 4 Improvement, methodology, query or suggestion  
0 ALERT type 5 Informative message, check

---

## Datablock: 12

---

Bond precision: C-C = 0.0053 A Wavelength=0.40651

Cell: a=12.4239(10) b=14.2358(12) c=19.0442(16)  
alpha=109.6426(17) beta=95.5642(18) gamma=102.0493(18)

Temperature: 100 K

|                        | Calculated                           | Reported                              |
|------------------------|--------------------------------------|---------------------------------------|
| Volume                 | 3050.8(4)                            | 3050.8(4)                             |
| Space group            | P -1                                 | P -1                                  |
| Hall group             | -P 1                                 | -P 1                                  |
| Moiety formula         | C53 H76 Fe2 N8 Si3 Zn [+<br>solvent] | C53 H76 Fe2 N8 Si3 Zn,<br>0.75[C6H14] |
| Sum formula            | C53 H76 Fe2 N8 Si3 Zn [+<br>solvent] | C57.50 H86.50 Fe2 N8 Si3 Zn           |
| Mr                     | 1086.58                              | 1151.18                               |
| Dx, g cm <sup>-3</sup> | 1.183                                | 1.253                                 |
| Z                      | 2                                    | 2                                     |
| Mu (mm <sup>-1</sup> ) | 0.213                                | 0.186                                 |
| F000                   | 1148.0                               | 1223.0                                |
| F000'                  | 1149.17                              |                                       |
| h, k, lmax             |                                      | 14, 16, 22                            |
| Nref                   |                                      | 10455                                 |
| Tmin, Tmax             | 0.967, 0.982                         | 0.670, 0.744                          |
| Tmin'                  | 0.946                                |                                       |

Correction method= # Reported T Limits: Tmin=0.670 Tmax=0.744  
AbsCorr = MULTI-SCAN

Data completeness= Theta(max)= 14.015

R(reflections)= 0.0426( 8583) wR2(reflections)=  
0.1294( 10455)

S = 1.035 Npar= 646

---

The following ALERTS were generated. Each ALERT has the format

**test-name\_ALERT\_alert-type\_alert-level.**

Click on the hyperlinks for more details of the test.

---

● **Alert level C**

PLAT029\_ALERT\_3\_C \_diffrn\_measured\_fraction\_theta\_full value Low . 0.968 Why?  
PLAT220\_ALERT\_2\_C NonSolvent Resd 1 C Ueq(max)/Ueq(min) Range 5.3 Ratio  
PLAT222\_ALERT\_3\_C NonSolvent Resd 1 H Uiso(max)/Uiso(min) Range 6.6 Ratio  
PLAT242\_ALERT\_2\_C Low 'MainMol' Ueq as Compared to Neighbors of C39 Check

---

● **Alert level G**

FORMU01\_ALERT\_2\_G There is a discrepancy between the atom counts in the  
\_chemical\_formula\_sum and the formula from the \_atom\_site\* data.  
Atom count from \_chemical\_formula\_sum: C57.5 H86.5 Fe2 N8 Si3 Zn1  
Atom count from the \_atom\_site data: C53 H76 Fe2 N8 Si3 Zn1

ABSMU01\_ALERT\_1\_G Calculation of \_exptl\_absorpt\_correction\_mu  
not performed for this radiation type.

CELLZ01\_ALERT\_1\_G Difference between formula and atom\_site contents detected.  
CELLZ01\_ALERT\_1\_G ALERT: Large difference may be due to a  
symmetry error - see SYMMG tests  
From the CIF: \_cell\_formula\_units\_Z 2  
From the CIF: \_chemical\_formula\_sum C57.50 H86.50 Fe2 N8 Si3 Zn  
TEST: Compare cell contents of formula and atom\_site data

| atom | Z*formula | cif sites | diff  |
|------|-----------|-----------|-------|
| C    | 115.00    | 106.00    | 9.00  |
| H    | 173.00    | 152.00    | 21.00 |
| Fe   | 4.00      | 4.00      | 0.00  |
| N    | 16.00     | 16.00     | 0.00  |
| Si   | 6.00      | 6.00      | 0.00  |
| Zn   | 2.00      | 2.00      | 0.00  |

PLAT002\_ALERT\_2\_G Number of Distance or Angle Restraints on AtSite 4 Note  
PLAT041\_ALERT\_1\_G Calc. and Reported SumFormula Strings Differ Please Check  
Calc: C53 H76 Fe2 N8 Si3 Zn  
Rep.: C57.50 H86.50 Fe2 N8 Si3 Zn

PLAT042\_ALERT\_1\_G Calc. and Reported MoietyFormula Strings Differ Please Check  
Calc: C53 H76 Fe2 N8 Si3 Zn  
Rep.: C53 H76 Fe2 N8 Si3 Zn, 0.75[C6H14]

PLAT092\_ALERT\_4\_G Check: Wavelength Given is not Cu,Ga,Mo,Ag,In Ka 0.40651 Ang.  
PLAT171\_ALERT\_4\_G The CIF-Embedded .res File Contains EADP Records 7 Report  
PLAT176\_ALERT\_4\_G The CIF-Embedded .res File Contains SADI Records 2 Report  
PLAT191\_ALERT\_3\_G A Non-default SADI Restraint Value has been used 0.0010 Report  
PLAT191\_ALERT\_3\_G A Non-default SADI Restraint Value has been used 0.0010 Report  
PLAT301\_ALERT\_3\_G Main Residue Disorder .....(Resd 1 ) 10% Note  
PLAT412\_ALERT\_2\_G Short Intra XH3 .. XHn H21 ..H28F . 2.09 Ang.  
x,y,z = 1\_555 Check

PLAT606\_ALERT\_4\_G Solvent Accessible VOID(S) in Structure ..... ! Info  
PLAT860\_ALERT\_3\_G Number of Least-Squares Restraints ..... 4 Note  
PLAT868\_ALERT\_4\_G ALERTS Due to the Use of \_smtbx\_masks Suppressed ! Info  
PLAT883\_ALERT\_1\_G No Info/Value for \_atom\_sites\_solution\_primary . Please Do !  
PLAT933\_ALERT\_2\_G Number of HKL-OMIT Records in Embedded .res File 28 Note

|    |   |    |    |   |    |    |    |    |    |    |    |    |    |    |    |    |    |
|----|---|----|----|---|----|----|----|----|----|----|----|----|----|----|----|----|----|
| -2 | 1 | 0, | -2 | 1 | 1, | -2 | 2  | 0, | -2 | 2  | 1, | -1 | 0  | 2, | -1 | 0  | 3, |
| -1 | 0 | 5, | -1 | 2 | 0, | 0  | -2 | 2, | 0  | -2 | 3, | 0  | -1 | 3, | 0  | -1 | 4, |
| 0  | 0 | 3, | 0  | 1 | 2, | 1  | -3 | 1, | 1  | -2 | 2, | 1  | -1 | 3, | 1  | 0  | 1, |
| 1  | 1 | 0, | 1  | 1 | 1, | 1  | 2  | 1, | 2  | -3 | 4, | 2  | -2 | 1, | 2  | -2 | 4, |

2 -1 1, 2 -1 2, 2 0 3, 2 1 3,

---

0 **ALERT level A** = Most likely a serious problem - resolve or explain  
0 **ALERT level B** = A potentially serious problem, consider carefully  
4 **ALERT level C** = Check. Ensure it is not caused by an omission or oversight  
19 **ALERT level G** = General information/check it is not something unexpected

6 ALERT type 1 CIF construction/syntax error, inconsistent or missing data  
6 ALERT type 2 Indicator that the structure model may be wrong or deficient  
6 ALERT type 3 Indicator that the structure quality may be low  
5 ALERT type 4 Improvement, methodology, query or suggestion  
0 ALERT type 5 Informative message, check

---

## Datablock: 13

---

Bond precision: C-C = 0.0085 Å Wavelength=0.71073

Cell: a=15.1571(7) b=21.4890(11) c=16.3741(8)  
alpha=90 beta=93.577(1) gamma=90

Temperature: 100 K

|                        | Calculated            | Reported                                 |
|------------------------|-----------------------|------------------------------------------|
| Volume                 | 5322.8(5)             | 5322.8(4)                                |
| Space group            | P 21/n                | P 1 21/n 1                               |
| Hall group             | -P 2yn                | -P 2yn                                   |
| Moiety formula         | C50 H69 F6 Fe3 N7 Si3 | C50 H69 F6 Fe2.741 N7 Si3,<br>0.086(Fe3) |
| Sum formula            | C50 H69 F6 Fe3 N7 Si3 | C50 H69 F6 Fe3 N7 Si3                    |
| Mr                     | 1133.95               | 1133.94                                  |
| Dx, g cm <sup>-3</sup> | 1.415                 | 1.415                                    |
| Z                      | 4                     | 4                                        |
| Mu (mm <sup>-1</sup> ) | 0.937                 | 0.937                                    |
| F000                   | 2368.0                | 2368.0                                   |
| F000'                  | 2373.92               |                                          |
| h, k, lmax             |                       | 18, 25, 19                               |
| Nref                   |                       | 9399                                     |
| Tmin, Tmax             | 0.873, 0.942          | 0.635, 0.745                             |
| Tmin'                  | 0.873                 |                                          |

Correction method= # Reported T Limits: Tmin=0.635 Tmax=0.745  
AbsCorr = MULTI-SCAN

Data completeness= Theta(max)= 25.115

R(reflections)= 0.0664( 6425)

wR2(reflections)=  
0.1942( 9399)

S = 1.018

Npar= 648

The following ALERTS were generated. Each ALERT has the format

**test-name\_ALERT\_alert-type\_alert-level.**

Click on the hyperlinks for more details of the test.

---

**Alert level C**

|                   |                                                 |              |
|-------------------|-------------------------------------------------|--------------|
| PLAT042_ALERT_1_C | Calc. and Reported MoietyFormula Strings Differ | Please Check |
|                   | Calc: C50 H69 F6 Fe3 N7 Si3                     |              |
|                   | Rep.: C50 H69 F6 Fe2.741 N7 Si3, 0.086(Fe3)     |              |
| PLAT213_ALERT_2_C | Atom F5 has ADP max/min Ratio .....             | 3.2 prolat   |
| PLAT213_ALERT_2_C | Atom C30 has ADP max/min Ratio .....            | 3.3 prolat   |
| PLAT213_ALERT_2_C | Atom C3A has ADP max/min Ratio .....            | 3.3 prolat   |
| PLAT220_ALERT_2_C | NonSolvent Resd 1 C Ueq(max)/Ueq(min) Range     | 4.6 Ratio    |
| PLAT222_ALERT_3_C | NonSolvent Resd 1 H Uiso(max)/Uiso(min) Range   | 5.8 Ratio    |
| PLAT230_ALERT_2_C | Hirshfeld Test Diff for F1 --C49 .              | 6.8 s.u.     |
| PLAT230_ALERT_2_C | Hirshfeld Test Diff for F3 --C49 .              | 5.2 s.u.     |
| PLAT341_ALERT_3_C | Low Bond Precision on C-C Bonds .....           | 0.00853 Ang. |

---

**Alert level G**

|                   |                                                  |             |
|-------------------|--------------------------------------------------|-------------|
| PLAT002_ALERT_2_G | Number of Distance or Angle Restraints on AtSite | 8 Note      |
| PLAT003_ALERT_2_G | Number of Uiso or Uij Restrained non-H Atoms ... | 8 Report    |
| PLAT083_ALERT_2_G | SHELXL Second Parameter in WGHT Unusually Large  | 21.24 Why ? |
| PLAT168_ALERT_4_G | The CIF-Embedded .res File Contains EXYZ Records | 1 Report    |
| PLAT171_ALERT_4_G | The CIF-Embedded .res File Contains EADP Records | 9 Report    |
| PLAT175_ALERT_4_G | The CIF-Embedded .res File Contains SAME Records | 1 Report    |
| PLAT177_ALERT_4_G | The CIF-Embedded .res File Contains DELU Records | 2 Report    |
| PLAT178_ALERT_4_G | The CIF-Embedded .res File Contains SIMU Records | 2 Report    |
| PLAT232_ALERT_2_G | Hirshfeld Test Diff (M-X) Fe1 --N3 .             | 5.5 s.u.    |
| PLAT232_ALERT_2_G | Hirshfeld Test Diff (M-X) Fe2 --N3 .             | 5.5 s.u.    |
| PLAT232_ALERT_2_G | Hirshfeld Test Diff (M-X) Fe2 --N5 .             | 6.0 s.u.    |
| PLAT232_ALERT_2_G | Hirshfeld Test Diff (M-X) Fe3A --N5 .            | 6.0 s.u.    |
| PLAT242_ALERT_2_G | Low 'MainMol' Ueq as Compared to Neighbors of    | C49 Check   |
| PLAT242_ALERT_2_G | Low 'MainMol' Ueq as Compared to Neighbors of    | C50 Check   |
| PLAT301_ALERT_3_G | Main Residue Disorder .....(Resd 1 )             | 10% Note    |
| PLAT720_ALERT_4_G | Number of Unusual/Non-Standard Labels .....      | 9 Note      |
|                   | H3AA H3AB H3AC H4AA H4AB H4AC H5AA H5AB          |             |
|                   | H5AC                                             |             |
| PLAT860_ALERT_3_G | Number of Least-Squares Restraints .....         | 54 Note     |
| PLAT883_ALERT_1_G | No Info/Value for _atom_sites_solution_primary . | Please Do ! |
| PLAT941_ALERT_3_G | Average HKL Measurement Multiplicity .....       | 3.1 Low     |

- 
- 0 **ALERT level A** = Most likely a serious problem - resolve or explain  
0 **ALERT level B** = A potentially serious problem, consider carefully  
9 **ALERT level C** = Check. Ensure it is not caused by an omission or oversight  
19 **ALERT level G** = General information/check it is not something unexpected
- 2 **ALERT type 1** CIF construction/syntax error, inconsistent or missing data

15 ALERT type 2 Indicator that the structure model may be wrong or deficient  
5 ALERT type 3 Indicator that the structure quality may be low  
6 ALERT type 4 Improvement, methodology, query or suggestion  
0 ALERT type 5 Informative message, check

---

## Datablock: 14

---

Bond precision: C-C = 0.0036 A Wavelength=0.71073  
Cell: a=12.3372(6) b=14.5673(7) c=19.6915(10)  
alpha=76.058(1) beta=73.437(1) gamma=79.142(1)  
Temperature: 100 K

|                        | Calculated                                           | Reported                               |
|------------------------|------------------------------------------------------|----------------------------------------|
| Volume                 | 3264.8(3)                                            | 3264.8(3)                              |
| Space group            | P -1                                                 | P -1                                   |
| Hall group             | -P 1                                                 | -P 1                                   |
| Moiety formula         | C55 H74 F5.93 Fe2 N8 Si3<br>Zn, 0.065(F) [+ solvent] | C55 H74 F6 Fe2 N8 Si3 Zn,<br>1.5[C6H6] |
| Sum formula            | C55 H74 F6 Fe2 N8 Si3 Zn [+<br>solvent]              | C64 H83 F6 Fe2 N8 Si3 Zn               |
| Mr                     | 1222.53                                              | 1339.72                                |
| Dx, g cm <sup>-3</sup> | 1.244                                                | 1.363                                  |
| Z                      | 2                                                    | 2                                      |
| Mu (mm <sup>-1</sup> ) | 0.914                                                | 0.920                                  |
| F000                   | 1275.9                                               | 1402.0                                 |
| F000'                  | 1278.80                                              |                                        |
| h, k, lmax             |                                                      | 14, 17, 23                             |
| Nref                   |                                                      | 11581                                  |
| Tmin, Tmax             | 0.750, 0.817                                         | 0.690, 0.745                           |
| Tmin'                  | 0.661                                                |                                        |

Correction method= # Reported T Limits: Tmin=0.690 Tmax=0.745  
AbsCorr = MULTI-SCAN

Data completeness= Theta(max)= 25.065

R(reflections)= 0.0327( 9245) wR2(reflections)=  
0.0791( 11581)  
S = 1.026 Npar= 712

---



The following ALERTS were generated. Each ALERT has the format

**test-name\_ALERT\_alert-type\_alert-level.**

Click on the hyperlinks for more details of the test.

---

**Alert level C**

|                   |            |           |     |                     |              |     |          |
|-------------------|------------|-----------|-----|---------------------|--------------|-----|----------|
| PLAT220_ALERT_2_C | NonSolvent | Resd 1    | C   | Ueq(max)/Ueq(min)   | Range        | 3.9 | Ratio    |
| PLAT222_ALERT_3_C | NonSolvent | Resd 1    | H   | Uiso(max)/Uiso(min) | Range        | 4.9 | Ratio    |
| PLAT230_ALERT_2_C | Hirshfeld  | Test Diff | for | Si3                 | --C38        | .   | 6.3 s.u. |
| PLAT242_ALERT_2_C | Low        | 'MainMol' | Ueq | as Compared to      | Neighbors of | C15 | Check    |

---

**Alert level G**

FORMU01\_ALERT\_2\_G There is a discrepancy between the atom counts in the  
\_chemical\_formula\_sum and the formula from the \_atom\_site\* data.  
Atom count from \_chemical\_formula\_sum: C64 H83 F6 Fe2 N8 Si3 Zn1  
Atom count from the \_atom\_site data: C55 H74 F6.001999 Fe2 N8 Si3 Zn1

CELLZ01\_ALERT\_1\_G Difference between formula and atom\_site contents detected.  
CELLZ01\_ALERT\_1\_G ALERT: Large difference may be due to a  
symmetry error - see SYMMG tests  
From the CIF: \_cell\_formula\_units\_Z 2  
From the CIF: \_chemical\_formula\_sum C64 H83 F6 Fe2 N8 Si3 Zn  
TEST: Compare cell contents of formula and atom\_site data

| atom | Z*formula | cif sites | diff  |
|------|-----------|-----------|-------|
| C    | 128.00    | 110.00    | 18.00 |
| H    | 166.00    | 148.00    | 18.00 |
| F    | 12.00     | 11.99     | 0.01  |
| Fe   | 4.00      | 4.00      | 0.00  |
| N    | 16.00     | 16.00     | 0.00  |
| Si   | 6.00      | 6.00      | 0.00  |
| Zn   | 2.00      | 2.00      | 0.00  |

PLAT041\_ALERT\_1\_G Calc. and Reported SumFormula Strings Differ Please Check  
Calc: C55 H74 F6 Fe2 N8 Si3 Zn  
Rep.: C64 H83 F6 Fe2 N8 Si3 Zn

PLAT042\_ALERT\_1\_G Calc. and Reported MoietyFormula Strings Differ Please Check  
Calc: C55 H74 F5.93 Fe2 N8 Si3 Zn, 0.065(F)  
Rep.: C55 H74 F6 Fe2 N8 Si3 Zn, 1.5[C6H6]

PLAT154\_ALERT\_1\_G The s.u.'s on the Cell Angles are Equal ..(Note) 0.001 Degree

PLAT171\_ALERT\_4\_G The CIF-Embedded .res File Contains EADP Records 3 Report

PLAT230\_ALERT\_2\_G Hirshfeld Test Diff for F1 --C54 . 7.7 s.u.

PLAT230\_ALERT\_2\_G Hirshfeld Test Diff for F3 --C54 . 6.3 s.u.

PLAT242\_ALERT\_2\_G Low 'MainMol' Ueq as Compared to Neighbors of C55 Check

PLAT301\_ALERT\_3\_G Main Residue Disorder .....(Resd 1 ) 4% Note

PLAT302\_ALERT\_4\_G Anion/Solvent/Minor-Residue Disorder (Resd 2 ) 100% Note

PLAT304\_ALERT\_4\_G Non-Integer Number of Atoms in ..... (Resd 1 ) 148.93 Check

PLAT304\_ALERT\_4\_G Non-Integer Number of Atoms in ..... (Resd 2 ) 0.06 Check

PLAT432\_ALERT\_2\_G Short Inter X...Y Contact F1 ..C34 . 2.95 Ang.  
-1+x,y,z = 1\_455 Check

PLAT432\_ALERT\_2\_G Short Inter X...Y Contact F3A ..C54 . 1.74 Ang.  
x,y,z = 1\_555 Check

PLAT432\_ALERT\_2\_G Short Inter X...Y Contact F3A ..C52 . 2.46 Ang.  
x,y,z = 1\_555 Check

PLAT606\_ALERT\_4\_G Solvent Accessible VOID(S) in Structure ..... ! Info

PLAT720\_ALERT\_4\_G Number of Unusual/Non-Standard Labels ..... 3 Note  
F0AA F1AA F2AA

PLAT860\_ALERT\_3\_G Number of Least-Squares Restraints ..... 1 Note

PLAT868\_ALERT\_4\_G ALERTS Due to the Use of \_smtbx\_masks Suppressed ! Info  
 PLAT883\_ALERT\_1\_G No Info/Value for \_atom\_sites\_solution\_primary . Please Do !  
 PLAT941\_ALERT\_3\_G Average HKL Measurement Multiplicity ..... 3.1 Low

---

0 **ALERT level A** = Most likely a serious problem - resolve or explain  
 0 **ALERT level B** = A potentially serious problem, consider carefully  
 4 **ALERT level C** = Check. Ensure it is not caused by an omission or oversight  
 23 **ALERT level G** = General information/check it is not something unexpected

6 ALERT type 1 CIF construction/syntax error, inconsistent or missing data  
 10 ALERT type 2 Indicator that the structure model may be wrong or deficient  
 4 ALERT type 3 Indicator that the structure quality may be low  
 7 ALERT type 4 Improvement, methodology, query or suggestion  
 0 ALERT type 5 Informative message, check

---

## Datablock: 15

---

|                        |                                            |                                 |                |
|------------------------|--------------------------------------------|---------------------------------|----------------|
| Bond precision:        | C-C = 0.0089 A                             | Wavelength=0.71073              |                |
| Cell:                  | a=11.9733 (5)                              | b=26.2570 (9)                   | c=26.2043 (10) |
|                        | alpha=90                                   | beta=100.148 (1)                | gamma=90       |
| Temperature:           | 100 K                                      |                                 |                |
|                        | Calculated                                 | Reported                        |                |
| Volume                 | 8109.3 (5)                                 | 8109.3 (5)                      |                |
| Space group            | P 21/n                                     | P 1 21/n 1                      |                |
| Hall group             | -P 2yn                                     | -P 2yn                          |                |
|                        | C50 H69 F6 Fe3 N7 Si3, C20                 | C50 H69 F6 Fe3 N7 Si3, C20      |                |
| Moiety formula         | H30 Co, C4 H10 O [+<br>solvent]            | H30 Co, C4 H10 O, 1[C4H8O]      |                |
| Sum formula            | C74 H109 Co F6 Fe3 N7 O Si3<br>[+ solvent] | C78 H117 Co F6 Fe3 N7 O2<br>Si3 |                |
| Mr                     | 1537.44                                    | 1609.53                         |                |
| Dx, g cm <sup>-3</sup> | 1.259                                      | 1.318                           |                |
| Z                      | 4                                          | 4                               |                |
| Mu (mm <sup>-1</sup> ) | 0.829                                      | 0.833                           |                |
| F000                   | 3244.0                                     | 3404.0                          |                |
| F000'                  | 3251.56                                    |                                 |                |
| h, k, lmax             |                                            | 14, 31, 31                      |                |
| Nref                   |                                            | 14337                           |                |
| Tmin, Tmax             | 0.847, 0.936                               | 0.683, 0.745                    |                |
| Tmin'                  | 0.847                                      |                                 |                |

Correction method= # Reported T Limits: Tmin=0.683 Tmax=0.745  
 AbsCorr = MULTI-SCAN

Data completeness=

Theta(max)= 25.089

R(reflections)= 0.0691( 8091)

wR2(reflections)=  
0.1765( 14337)

S = 1.026

Npar= 878

---

The following ALERTS were generated. Each ALERT has the format

**test-name\_ALERT\_alert-type\_alert-level.**

Click on the hyperlinks for more details of the test.

---

● **Alert level C**

|                   |                 |               |           |                             |             |        |       |      |
|-------------------|-----------------|---------------|-----------|-----------------------------|-------------|--------|-------|------|
| PLAT220_ALERT_2_C | NonSolvent      | Resd 1        | C         | Ueq(max)/Ueq(min)           | Range       | 5.0    | Ratio |      |
| PLAT222_ALERT_3_C | NonSolvent      | Resd 1        | H         | Uiso(max)/Uiso(min)         | Range       | 5.9    | Ratio |      |
| PLAT234_ALERT_4_C | Large Hirshfeld | Difference    | C54       | --C55                       | .           | 0.18   | Ang.  |      |
| PLAT242_ALERT_2_C | Low             | 'MainMol'     | Ueq       | as Compared to Neighbors of |             | C15    | Check |      |
| PLAT242_ALERT_2_C | Low             | 'MainMol'     | Ueq       | as Compared to Neighbors of |             | C27    | Check |      |
| PLAT250_ALERT_2_C | Large           | U3/U1         | Ratio     | for Average U(i,j)          | Tensor .... | 2.1    | Note  |      |
| PLAT260_ALERT_2_C | Large           | Average       | Ueq       | of Residue Including        | 01          | 0.117  | Check |      |
| PLAT341_ALERT_3_C | Low             | Bond          | Precision | on C-C Bonds .....          |             | 0.0089 | Ang.  |      |
| PLAT360_ALERT_2_C | Short           | C(sp3)-C(sp3) | Bond      | C71                         | - C72       | .      | 1.42  | Ang. |

---

● **Alert level G**

FORMU01\_ALERT\_2\_G There is a discrepancy between the atom counts in the  
\_chemical\_formula\_sum and the formula from the \_atom\_site\* data.  
Atom count from \_chemical\_formula\_sum: C78 H117 Co1 F6 Fe3 N7 O2 Si3  
Atom count from the \_atom\_site data: C74 H109 Co1 F6 Fe3 N7 O1 Si3

CELLZ01\_ALERT\_1\_G Difference between formula and atom\_site contents detected.

CELLZ01\_ALERT\_1\_G ALERT: Large difference may be due to a  
symmetry error - see SYMMG tests

From the CIF: \_cell\_formula\_units\_Z 4

From the CIF: \_chemical\_formula\_sum C78 H117 Co F6 Fe3 N7 O2 Si3

TEST: Compare cell contents of formula and atom\_site data

| atom | Z*formula | cif sites | diff  |
|------|-----------|-----------|-------|
| C    | 312.00    | 296.00    | 16.00 |
| H    | 468.00    | 436.00    | 32.00 |
| Co   | 4.00      | 4.00      | 0.00  |
| F    | 24.00     | 24.00     | 0.00  |
| Fe   | 12.00     | 12.00     | 0.00  |
| N    | 28.00     | 28.00     | 0.00  |
| O    | 8.00      | 4.00      | 4.00  |
| Si   | 12.00     | 12.00     | 0.00  |

PLAT002\_ALERT\_2\_G Number of Distance or Angle Restraints on AtSite 14 Note

PLAT041\_ALERT\_1\_G Calc. and Reported SumFormula Strings Differ Please Check

Calc: C74 H109 Co F6 Fe3 N7 O Si3

Rep.: C78 H117 Co F6 Fe3 N7 O2 Si3

PLAT042\_ALERT\_1\_G Calc. and Reported MoietyFormula Strings Differ Please Check

Calc: C50 H69 F6 Fe3 N7 Si3, C20 H30 Co, C4 H10 O

Rep.: C50 H69 F6 Fe3 N7 Si3, C20 H30 Co, C4 H10 O, 1[C4H8O]

PLAT083\_ALERT\_2\_G SHELXL Second Parameter in WGHT Unusually Large 14.44 Why ?

PLAT171\_ALERT\_4\_G The CIF-Embedded .res File Contains EADP Records 4 Report

PLAT176\_ALERT\_4\_G The CIF-Embedded .res File Contains SADI Records 4 Report

|                   |                                                  |             |        |
|-------------------|--------------------------------------------------|-------------|--------|
| PLAT187_ALERT_4_G | The CIF-Embedded .res File Contains RIGU Records | 2           | Report |
| PLAT190_ALERT_3_G | A Non-default RIGU Restraint Value for First Par | 0.0050      | Report |
| PLAT190_ALERT_3_G | A Non-default RIGU Restraint Value for SecondPar | 0.0050      | Report |
| PLAT190_ALERT_3_G | A Non-default RIGU Restraint Value for First Par | 0.0010      | Report |
| PLAT190_ALERT_3_G | A Non-default RIGU Restraint Value for SecondPar | 0.0010      | Report |
| PLAT230_ALERT_2_G | Hirshfeld Test Diff for F6 --C49 .               | 7.7         | s.u.   |
| PLAT230_ALERT_2_G | Hirshfeld Test Diff for F4A --C49 .              | 6.5         | s.u.   |
| PLAT230_ALERT_2_G | Hirshfeld Test Diff for F5A --C49 .              | 9.0         | s.u.   |
| PLAT242_ALERT_2_G | Low 'MainMol' Ueq as Compared to Neighbors of    | C49         | Check  |
| PLAT301_ALERT_3_G | Main Residue Disorder .....(Resd 1 )             | 9%          | Note   |
| PLAT380_ALERT_4_G | Incorrectly? Oriented X(sp2)-Methyl Moiety ..... | C59         | Check  |
| PLAT606_ALERT_4_G | Solvent Accessible VOID(S) in Structure .....    | !           | Info   |
| PLAT720_ALERT_4_G | Number of Unusual/Non-Standard Labels .....      | 26          | Note   |
|                   | Ha Hb Hc Hd He Hf Hg Hh                          |             |        |
|                   | Hi Hj Hk Hl Hm Hn Ho Hp                          |             |        |
|                   | Hq Hr Hs Ht Hu Hv Hw Hx                          |             |        |
|                   | Hy Hz                                            |             |        |
| PLAT794_ALERT_5_G | Tentative Bond Valency for Co1 (III) .           | 3.31        | Info   |
| PLAT860_ALERT_3_G | Number of Least-Squares Restraints .....         | 117         | Note   |
| PLAT868_ALERT_4_G | ALERTS Due to the Use of _smtbx_masks Suppressed | !           | Info   |
| PLAT883_ALERT_1_G | No Info/Value for _atom_sites_solution_primary . | Please Do ! |        |
| PLAT941_ALERT_3_G | Average HKL Measurement Multiplicity .....       | 4.3         | Low    |

---

0 **ALERT level A** = Most likely a serious problem - resolve or explain  
0 **ALERT level B** = A potentially serious problem, consider carefully  
9 **ALERT level C** = Check. Ensure it is not caused by an omission or oversight  
27 **ALERT level G** = General information/check it is not something unexpected

5 ALERT type 1 CIF construction/syntax error, inconsistent or missing data  
13 ALERT type 2 Indicator that the structure model may be wrong or deficient  
9 ALERT type 3 Indicator that the structure quality may be low  
8 ALERT type 4 Improvement, methodology, query or suggestion  
1 ALERT type 5 Informative message, check

---

## Datablock: 16

---

Bond precision: C-C = 0.0062 A

Wavelength=0.41328

Cell: a=15.4746(7) b=23.8238(11) c=27.1431(13)  
alpha=78.401(1) beta=74.315(1) gamma=83.137(1)

Temperature: 100 K

|                        | Calculated                                                       | Reported                                                             |
|------------------------|------------------------------------------------------------------|----------------------------------------------------------------------|
| Volume                 | 9414.8(8)                                                        | 9414.8(8)                                                            |
| Space group            | P -1                                                             | P -1                                                                 |
| Hall group             | -P 1                                                             | -P 1                                                                 |
| Moiety formula         | C50 H69 F6 Fe2 N7 Si3 Zn,<br>C18 H36 K N2 O6, 2.625(C4<br>H10 O) | C50 H69 F6 Fe2.01 N7 Si3<br>Zn0.99, C18 H36 K N2 O6,<br>2.625(C4 H10 |
| Sum formula            | C78.50 H131.25 F6 Fe2 K N9<br>O8.63 Si3 Zn                       | C78.50 H131.25 F6 Fe2.01 K<br>N9 O8.62 Si3 Zn0.99                    |
| Mr                     | 1753.54                                                          | 1753.51                                                              |
| Dx, g cm <sup>-3</sup> | 1.237                                                            | 1.237                                                                |
| Z                      | 4                                                                | 4                                                                    |
| Mu (mm <sup>-1</sup> ) | 0.168                                                            | 0.168                                                                |
| F000                   | 3724.8                                                           | 3725.0                                                               |
| F000'                  | 3727.58                                                          |                                                                      |
| h, k, lmax             |                                                                  | 19, 29, 33                                                           |
| Nref                   |                                                                  | 37723                                                                |
| Tmin, Tmax             | 0.972, 0.985                                                     | 0.909, 1.014                                                         |
| Tmin'                  | 0.972                                                            |                                                                      |

Correction method= # Reported T Limits: Tmin=0.909 Tmax=1.014  
AbsCorr = MULTI-SCAN

Data completeness= Theta(max)= 14.987

R(reflections)= 0.0548( 27581) wR2(reflections)=  
0.1539( 37723)  
S = 1.026 Npar= 2087

The following ALERTS were generated. Each ALERT has the format  
**test-name\_ALERT\_alert-type\_alert-level.**  
Click on the hyperlinks for more details of the test.

### Alert level C

RINTA01\_ALERT\_3\_C The value of Rint is greater than 0.12  
Rint given 0.124

PLAT029\_ALERT\_3\_C \_diffn\_measured\_fraction\_theta\_full value Low . 0.979 Why?

PLAT041\_ALERT\_1\_C Calc. and Reported SumFormula Strings Differ Please Check  
Calc: C78.50 H131.25 F6 Fe2 K N9 O8.63 Si3 Zn  
Rep.: C78.50 H131.25 F6 Fe2.01 K N9 O8.62 Si3 Zn0.99

PLAT042\_ALERT\_1\_C Calc. and Reported MoietyFormula Strings Differ Please Check  
Calc: C50 H69 F6 Fe2 N7 Si3 Zn, C18 H36 K N2 O6, 2.625(C4 H10 O)  
Rep.: C50 H69 F6 Fe2.01 N7 Si3 Zn0.99, C18 H36 K N2 O6, 2.625(C4 H

PLAT077\_ALERT\_4\_C Unitcell Contains Non-integer Number of Atoms .. Please Check

PLAT213\_ALERT\_2\_C Atom F4 has ADP max/min Ratio ..... 3.2 prolat

PLAT213\_ALERT\_2\_C Atom F4A has ADP max/min Ratio ..... 3.2 prolat

PLAT223\_ALERT\_4\_C Solv./Anion Resd 2 H Ueq(max)/Ueq(min) Range 4.1 Ratio

|                   |       |                   |                                 |         |             |
|-------------------|-------|-------------------|---------------------------------|---------|-------------|
| PLAT241_ALERT_2_C | High  | 'MainMol'         | Ueq as Compared to Neighbors of | C125    | Check       |
| PLAT241_ALERT_2_C | High  | 'MainMol'         | Ueq as Compared to Neighbors of | C126    | Check       |
| PLAT242_ALERT_2_C | Low   | 'MainMol'         | Ueq as Compared to Neighbors of | C66     | Check       |
| PLAT244_ALERT_4_C | Low   | 'Solvent'         | Ueq as Compared to Neighbors of | O13     | Check       |
| PLAT244_ALERT_4_C | Low   | 'Solvent'         | Ueq as Compared to Neighbors of | O14     | Check       |
| PLAT260_ALERT_2_C | Large | Average           | Ueq of Residue Including        | O13     | 0.150 Check |
| PLAT260_ALERT_2_C | Large | Average           | Ueq of Residue Including        | O14     | 0.112 Check |
| PLAT260_ALERT_2_C | Large | Average           | Ueq of Residue Including        | O16     | 0.200 Check |
| PLAT260_ALERT_2_C | Large | Average           | Ueq of Residue Including        | O17     | 0.185 Check |
| PLAT260_ALERT_2_C | Large | Average           | Ueq of Residue Including        | O16A    | 0.200 Check |
| PLAT260_ALERT_2_C | Large | Average           | Ueq of Residue Including        | O18     | 0.130 Check |
| PLAT260_ALERT_2_C | Large | Average           | Ueq of Residue Including        | O18A    | 0.130 Check |
| PLAT341_ALERT_3_C | Low   | Bond Precision on | C-C Bonds .....                 | 0.00621 | Ang.        |

### Alert level G

|                   |                                                                                    |                |                                 |         |              |
|-------------------|------------------------------------------------------------------------------------|----------------|---------------------------------|---------|--------------|
| ABSMU01_ALERT_1_G | Calculation of _exptl_absorpt_correction_mu not performed for this radiation type. |                |                                 |         |              |
| PLAT002_ALERT_2_G | Number of Distance or Angle Restraints on AtSite                                   |                |                                 | 43      | Note         |
| PLAT003_ALERT_2_G | Number of Uiso or Uij Restrained non-H Atoms ...                                   |                |                                 | 28      | Report       |
| PLAT012_ALERT_1_G | N.O.K. _shelx_res_checksum Found in CIF .....                                      |                |                                 |         | Please Check |
| PLAT020_ALERT_3_G | The Value of Rint is Greater Than 0.12 .....                                       |                |                                 | 0.124   | Report       |
| PLAT068_ALERT_1_G | Reported F000 Differs from Calcd (or Missing)...                                   |                |                                 |         | Please Check |
| PLAT083_ALERT_2_G | SHELXL Second Parameter in WGHT Unusually Large                                    |                |                                 | 14.64   | Why ?        |
| PLAT092_ALERT_4_G | Check: Wavelength Given is not Cu,Ga,Mo,Ag,In Ka                                   |                |                                 | 0.41328 | Ang.         |
| PLAT154_ALERT_1_G | The s.u.'s on the Cell Angles are Equal ..(Note)                                   |                |                                 | 0.001   | Degree       |
| PLAT168_ALERT_4_G | The CIF-Embedded .res File Contains EXYZ Records                                   |                |                                 | 7       | Report       |
| PLAT171_ALERT_4_G | The CIF-Embedded .res File Contains EADP Records                                   |                |                                 | 25      | Report       |
| PLAT175_ALERT_4_G | The CIF-Embedded .res File Contains SAME Records                                   |                |                                 | 6       | Report       |
| PLAT177_ALERT_4_G | The CIF-Embedded .res File Contains DELU Records                                   |                |                                 | 4       | Report       |
| PLAT178_ALERT_4_G | The CIF-Embedded .res File Contains SIMU Records                                   |                |                                 | 4       | Report       |
| PLAT187_ALERT_4_G | The CIF-Embedded .res File Contains RIGU Records                                   |                |                                 | 1       | Report       |
| PLAT188_ALERT_3_G | A Non-default SIMU Restraint Value has been used                                   |                |                                 | 0.0100  | Report       |
| PLAT188_ALERT_3_G | A Non-default SIMU Restraint Value has been used                                   |                |                                 | 0.0100  | Report       |
| PLAT188_ALERT_3_G | A Non-default SIMU Restraint Value has been used                                   |                |                                 | 0.0100  | Report       |
| PLAT188_ALERT_3_G | A Non-default SIMU Restraint Value has been used                                   |                |                                 | 0.0100  | Report       |
| PLAT192_ALERT_3_G | A Non-default DELU Restraint Value for First Par                                   |                |                                 | 0.0050  | Report       |
| PLAT192_ALERT_3_G | A Non-default DELU Restraint Value for SecondPar                                   |                |                                 | 0.0050  | Report       |
| PLAT192_ALERT_3_G | A Non-default DELU Restraint Value for First Par                                   |                |                                 | 0.0050  | Report       |
| PLAT192_ALERT_3_G | A Non-default DELU Restraint Value for SecondPar                                   |                |                                 | 0.0050  | Report       |
| PLAT192_ALERT_3_G | A Non-default DELU Restraint Value for First Par                                   |                |                                 | 0.0050  | Report       |
| PLAT192_ALERT_3_G | A Non-default DELU Restraint Value for SecondPar                                   |                |                                 | 0.0050  | Report       |
| PLAT192_ALERT_3_G | A Non-default DELU Restraint Value for First Par                                   |                |                                 | 0.0050  | Report       |
| PLAT192_ALERT_3_G | A Non-default DELU Restraint Value for SecondPar                                   |                |                                 | 0.0050  | Report       |
| PLAT242_ALERT_2_G | Low                                                                                | 'MainMol'      | Ueq as Compared to Neighbors of | C49     | Check        |
| PLAT242_ALERT_2_G | Low                                                                                | 'MainMol'      | Ueq as Compared to Neighbors of | C100    | Check        |
| PLAT242_ALERT_2_G | Low                                                                                | 'MainMol'      | Ueq as Compared to Neighbors of | C101    | Check        |
| PLAT300_ALERT_4_G | Atom Site Occupancy of Zn1                                                         | Constrained at |                                 | 0.33    | Check        |
| PLAT300_ALERT_4_G | Atom Site Occupancy of Zn2                                                         | Constrained at |                                 | 0.33    | Check        |
| PLAT300_ALERT_4_G | Atom Site Occupancy of Zn3                                                         | Constrained at |                                 | 0.33    | Check        |
| PLAT300_ALERT_4_G | Atom Site Occupancy of Fe1                                                         | Constrained at |                                 | 0.67    | Check        |
| PLAT300_ALERT_4_G | Atom Site Occupancy of Fe2                                                         | Constrained at |                                 | 0.67    | Check        |
| PLAT300_ALERT_4_G | Atom Site Occupancy of Fe3                                                         | Constrained at |                                 | 0.67    | Check        |
| PLAT300_ALERT_4_G | Atom Site Occupancy of Zn4                                                         | Constrained at |                                 | 0.33    | Check        |
| PLAT300_ALERT_4_G | Atom Site Occupancy of Zn5                                                         | Constrained at |                                 | 0.33    | Check        |
| PLAT300_ALERT_4_G | Atom Site Occupancy of Zn6                                                         | Constrained at |                                 | 0.33    | Check        |
| PLAT300_ALERT_4_G | Atom Site Occupancy of Fe4                                                         | Constrained at |                                 | 0.67    | Check        |

|                   |                                        |                |       |        |
|-------------------|----------------------------------------|----------------|-------|--------|
| PLAT300_ALERT_4_G | Atom Site Occupancy of Fe5             | Constrained at | 0.67  | Check  |
| PLAT300_ALERT_4_G | Atom Site Occupancy of Fe6             | Constrained at | 0.67  | Check  |
| PLAT300_ALERT_4_G | Atom Site Occupancy of O17             | Constrained at | 0.5   | Check  |
| PLAT300_ALERT_4_G | Atom Site Occupancy of C155            | Constrained at | 0.5   | Check  |
| PLAT300_ALERT_4_G | Atom Site Occupancy of C156            | Constrained at | 0.5   | Check  |
| PLAT300_ALERT_4_G | Atom Site Occupancy of C157            | Constrained at | 0.5   | Check  |
| PLAT300_ALERT_4_G | Atom Site Occupancy of C158            | Constrained at | 0.5   | Check  |
| PLAT300_ALERT_4_G | Atom Site Occupancy of H15G            | Constrained at | 0.5   | Check  |
| PLAT300_ALERT_4_G | Atom Site Occupancy of H15H            | Constrained at | 0.5   | Check  |
| PLAT300_ALERT_4_G | Atom Site Occupancy of H15I            | Constrained at | 0.5   | Check  |
| PLAT300_ALERT_4_G | Atom Site Occupancy of H15J            | Constrained at | 0.5   | Check  |
| PLAT300_ALERT_4_G | Atom Site Occupancy of H15K            | Constrained at | 0.5   | Check  |
| PLAT300_ALERT_4_G | Atom Site Occupancy of H15L            | Constrained at | 0.5   | Check  |
| PLAT300_ALERT_4_G | Atom Site Occupancy of H15M            | Constrained at | 0.5   | Check  |
| PLAT300_ALERT_4_G | Atom Site Occupancy of H15N            | Constrained at | 0.5   | Check  |
| PLAT300_ALERT_4_G | Atom Site Occupancy of H15O            | Constrained at | 0.5   | Check  |
| PLAT300_ALERT_4_G | Atom Site Occupancy of H15P            | Constrained at | 0.5   | Check  |
| PLAT301_ALERT_3_G | Main Residue Disorder .....            | (Resd 1 )      | 10%   | Note   |
| PLAT302_ALERT_4_G | Anion/Solvent/Minor-Residue Disorder   | (Resd 2 )      | 4%    | Note   |
| PLAT302_ALERT_4_G | Anion/Solvent/Minor-Residue Disorder   | (Resd 7 )      | 100%  | Note   |
| PLAT302_ALERT_4_G | Anion/Solvent/Minor-Residue Disorder   | (Resd 8 )      | 100%  | Note   |
| PLAT302_ALERT_4_G | Anion/Solvent/Minor-Residue Disorder   | (Resd 9 )      | 100%  | Note   |
| PLAT302_ALERT_4_G | Anion/Solvent/Minor-Residue Disorder   | (Resd 10 )     | 100%  | Note   |
| PLAT302_ALERT_4_G | Anion/Solvent/Minor-Residue Disorder   | (Resd 11 )     | 100%  | Note   |
| PLAT302_ALERT_4_G | Anion/Solvent/Minor-Residue Disorder   | (Resd 12 )     | 100%  | Note   |
| PLAT302_ALERT_4_G | Anion/Solvent/Minor-Residue Disorder   | (Resd 13 )     | 100%  | Note   |
| PLAT304_ALERT_4_G | Non-Integer Number of Atoms in .....   | (Resd 7 )      | 9.06  | Check  |
| PLAT304_ALERT_4_G | Non-Integer Number of Atoms in .....   | (Resd 8 )      | 10.83 | Check  |
| PLAT304_ALERT_4_G | Non-Integer Number of Atoms in .....   | (Resd 9 )      | 7.50  | Check  |
| PLAT304_ALERT_4_G | Non-Integer Number of Atoms in .....   | (Resd 10 )     | 5.94  | Check  |
| PLAT304_ALERT_4_G | Non-Integer Number of Atoms in .....   | (Resd 11 )     | 4.17  | Check  |
| PLAT304_ALERT_4_G | Non-Integer Number of Atoms in .....   | (Resd 12 )     | 3.85  | Check  |
| PLAT304_ALERT_4_G | Non-Integer Number of Atoms in .....   | (Resd 13 )     | 7.39  | Check  |
| PLAT398_ALERT_2_G | Deviating C-O-C Angle From 120 for O13 | .              | 109.3 | Degree |
| PLAT398_ALERT_2_G | Deviating C-O-C Angle From 120 for O17 | .              | 141.3 | Degree |
| PLAT411_ALERT_2_G | Short Inter H...H Contact H2B ..H15V   | .              | 2.10  | Ang.   |
|                   |                                        | 1-x,1-y,-z =   | 2_665 | Check  |
| PLAT413_ALERT_2_G | Short Inter XH3 .. XHn H13V ..H1IB     | .              | 1.79  | Ang.   |
|                   |                                        | 1-x,1-y,1-z =  | 2_666 | Check  |

**Author Response: H atoms are located on a disordered solvent molecule. Modeling of this disorder results in unusually short interatomic distances in some cases.**

|                   |                                                  |               |       |       |
|-------------------|--------------------------------------------------|---------------|-------|-------|
| PLAT432_ALERT_2_G | Short Inter X...Y Contact O13 ..C159             | .             | 2.62  | Ang.  |
|                   |                                                  | 1-x,1-y,1-z = | 2_666 | Check |
| PLAT432_ALERT_2_G | Short Inter X...Y Contact C139 ..C159            | .             | 3.18  | Ang.  |
|                   |                                                  | 1-x,1-y,1-z = | 2_666 | Check |
| PLAT720_ALERT_4_G | Number of Unusual/Non-Standard Labels .....      |               | 32    | Note  |
|                   | Ha H1AA H1AB H1AC H1BA H1BB H1CA H1CB            |               |       |       |
|                   | H1DA H1DB H1DC H1EA H1EB H1EC H1FA H1FB          |               |       |       |
|                   | H1GA H1GB H1HA H1HB H1HC Hb H1IA H1IB            |               |       |       |
|                   | H1IC H1JA H1JB H1KA H1KB H1LA H1LB H1LC          |               |       |       |
| PLAT789_ALERT_4_G | Atoms with Negative _atom_site_disorder_group #  |               | 45    | Check |
| PLAT822_ALERT_4_G | CIF-embedded .res Contains Negative PART Numbers |               | 3     | Check |

```

PLAT860_ALERT_3_G Number of Least-Squares Restraints ..... 365 Note
PLAT933_ALERT_2_G Number of HKL-OMIT Records in Embedded .res File 40 Note
-2 -5 1, -2 0 1, -2 0 2, -2 1 1, -1 -1 2, -1 0 2,
-1 2 1, -1 2 2, -1 3 1, -1 3 2, 0 -3 3, 0 -2 1,
0 -1 4, 0 1 4, 0 3 4, 1 1 4, 1 2 3, 1 2 8,
1 3 0, 2 0 1, 2 3 2, 2 3 4, 2 4 3, 2 5 1,
3 2 0, 3 5 7, 1 0 0, -1 1 0, 0 1 0, 1 1 0,
0 2 0, 0 -1 1, 1 -1 -1, -1 0 1, 0 0 1, 1 0 1,
0 1 1, 1 1 1, 0 0 2, 0 1 2,

```

---

```

0 ALERT level A = Most likely a serious problem - resolve or explain
0 ALERT level B = A potentially serious problem, consider carefully
21 ALERT level C = Check. Ensure it is not caused by an omission or oversight
84 ALERT level G = General information/check it is not something unexpected

6 ALERT type 1 CIF construction/syntax error, inconsistent or missing data
25 ALERT type 2 Indicator that the structure model may be wrong or deficient
18 ALERT type 3 Indicator that the structure quality may be low
56 ALERT type 4 Improvement, methodology, query or suggestion
0 ALERT type 5 Informative message, check

```

---

It is advisable to attempt to resolve as many as possible of the alerts in all categories. Often the minor alerts point to easily fixed oversights, errors and omissions in your CIF or refinement strategy, so attention to these fine details can be worthwhile. In order to resolve some of the more serious problems it may be necessary to carry out additional measurements or structure refinements. However, the purpose of your study may justify the reported deviations and the more serious of these should normally be commented upon in the discussion or experimental section of a paper or in the "special\_details" fields of the CIF. checkCIF was carefully designed to identify outliers and unusual parameters, but every test has its limitations and alerts that are not important in a particular case may appear. Conversely, the absence of alerts does not guarantee there are no aspects of the results needing attention. It is up to the individual to critically assess their own results and, if necessary, seek expert advice.

### Publication of your CIF in IUCr journals

A basic structural check has been run on your CIF. These basic checks will be run on all CIFs submitted for publication in IUCr journals (*Acta Crystallographica*, *Journal of Applied Crystallography*, *Journal of Synchrotron Radiation*); however, if you intend to submit to *Acta Crystallographica Section C* or *E* or *IUCrData*, you should make sure that full publication checks are run on the final version of your CIF prior to submission.

### Publication of your CIF in other journals

Please refer to the *Notes for Authors* of the relevant journal for any special instructions relating to CIF submission.



PLATON version of 14/11/2023; check.def file version of 14/09/2023

Datablock 2 - ellipsoid plot

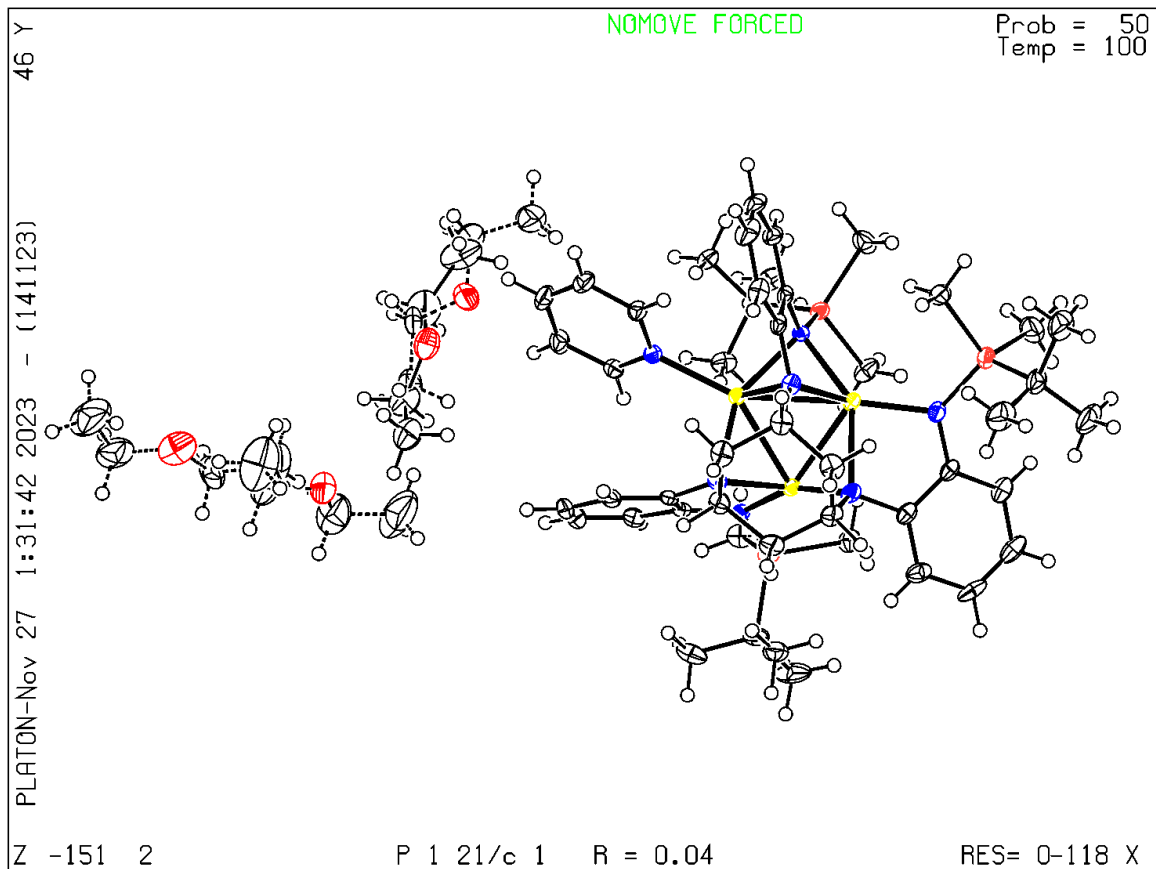

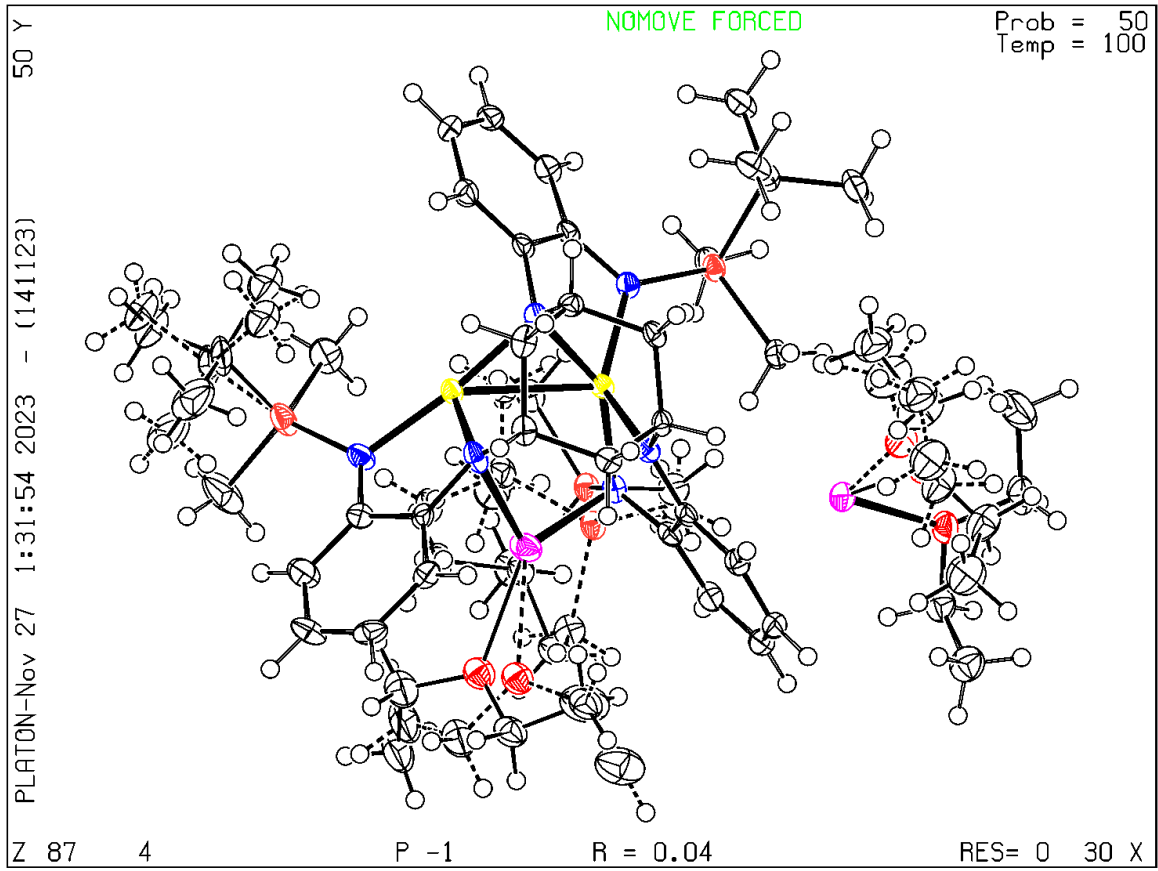

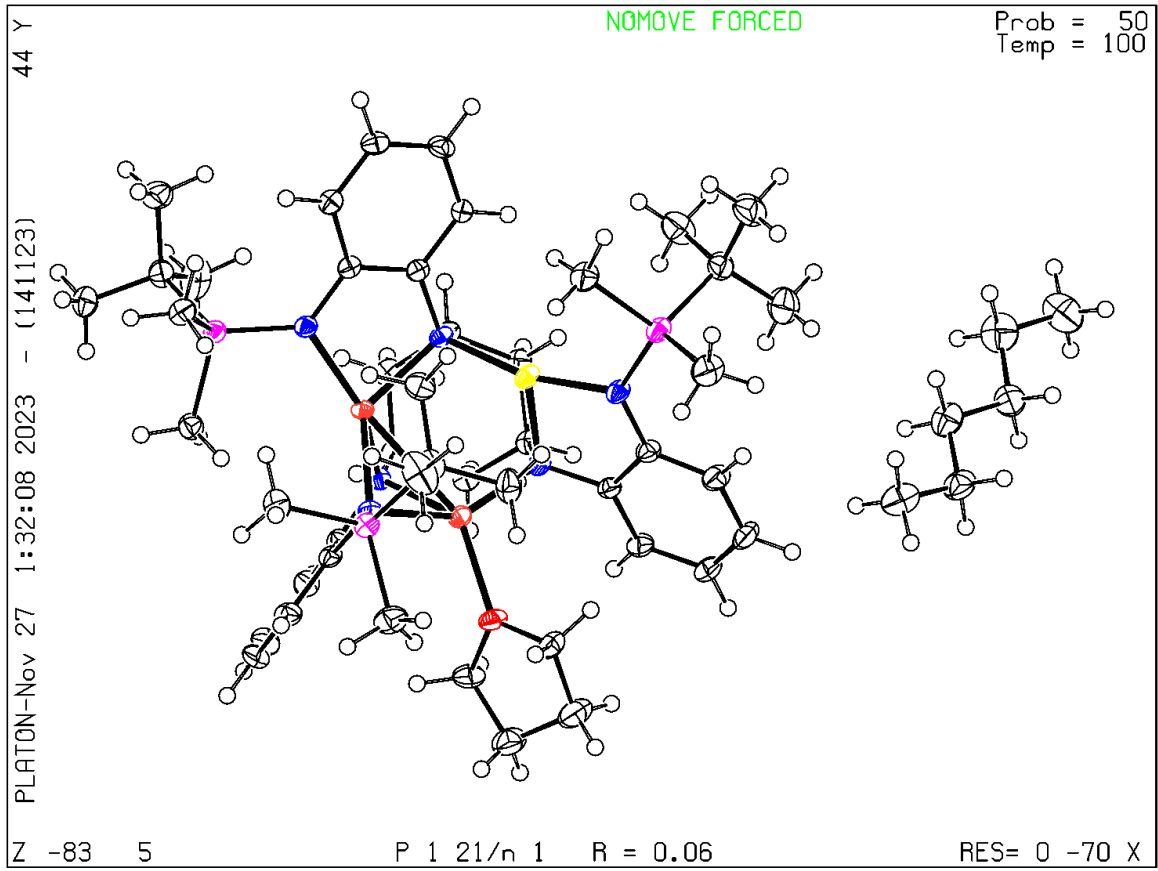

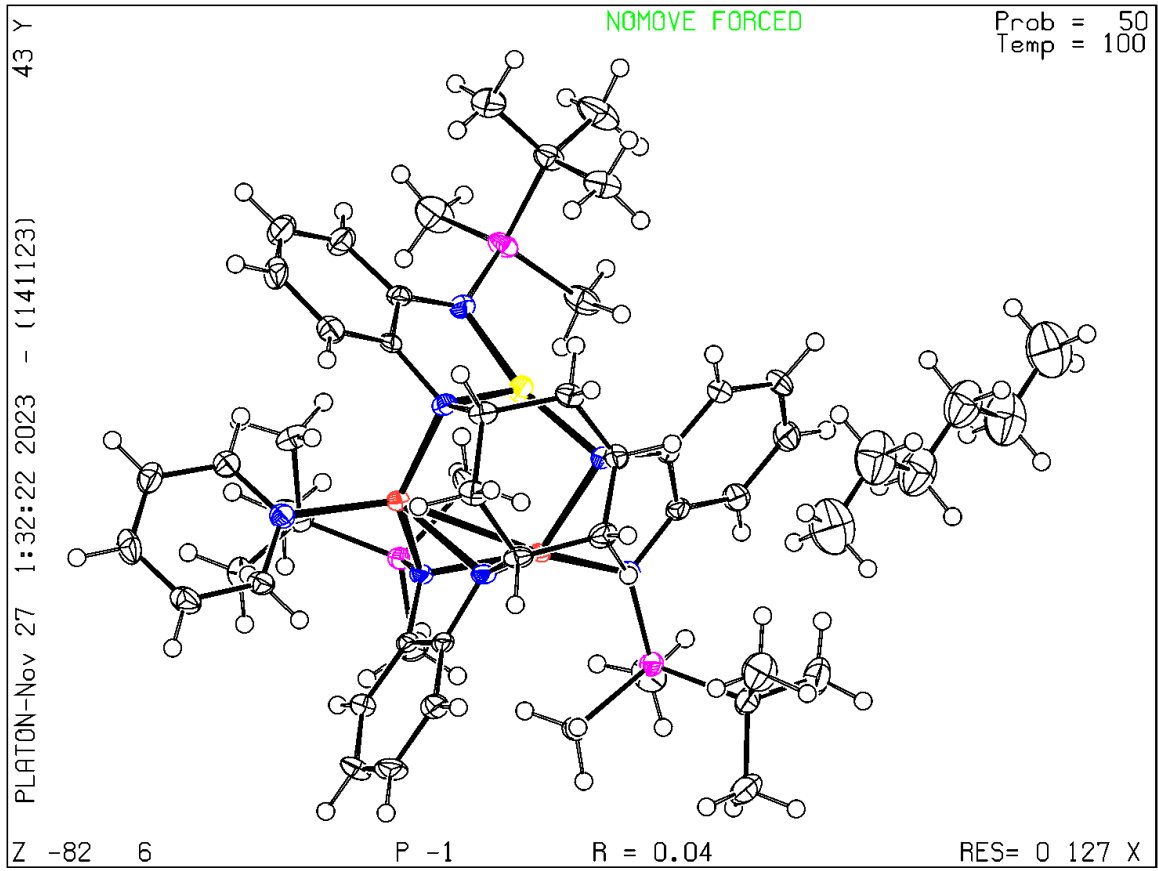

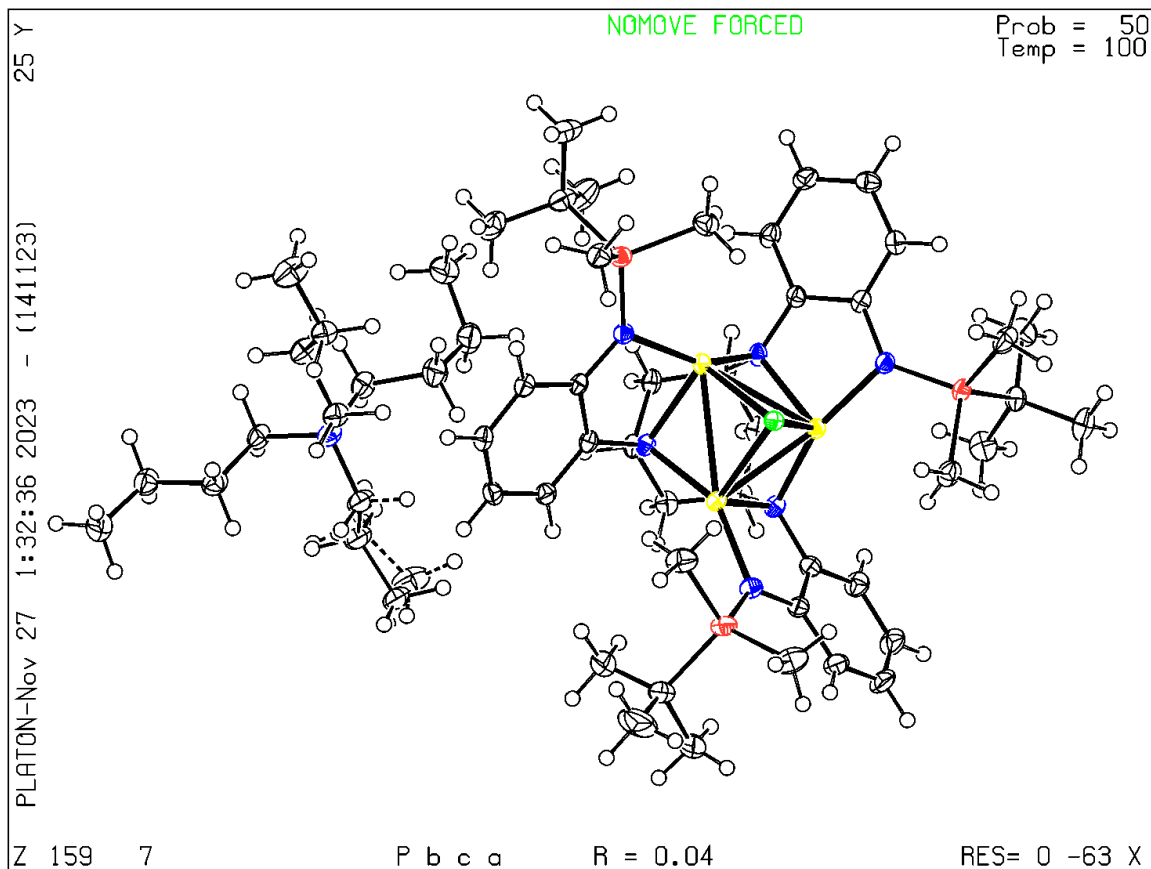

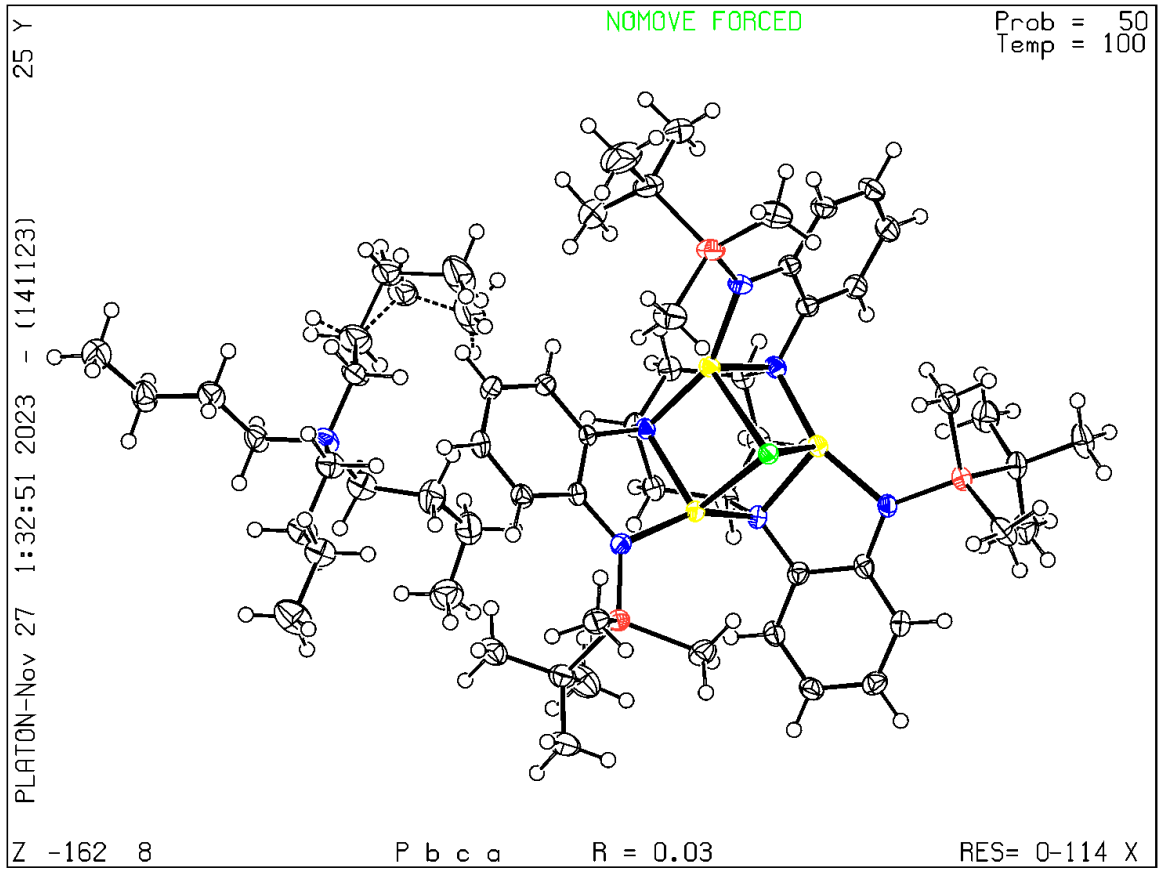

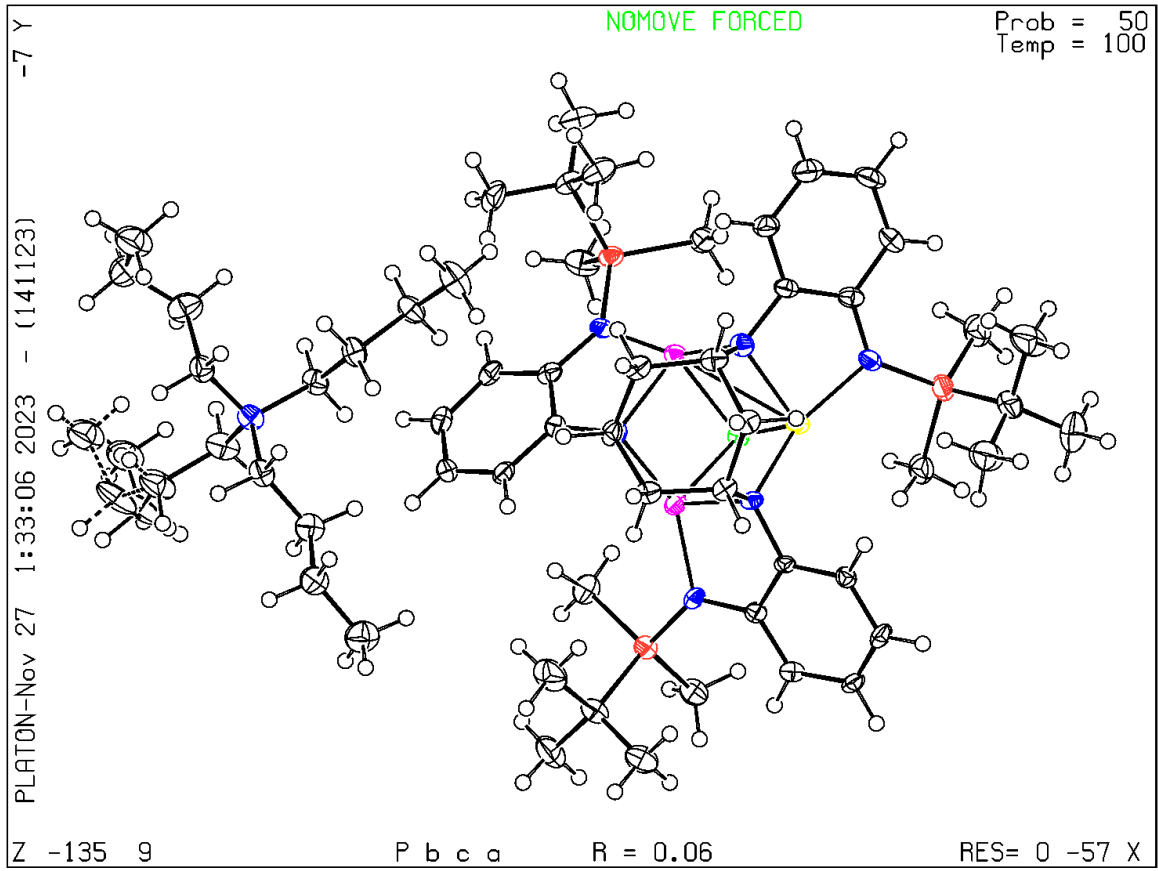

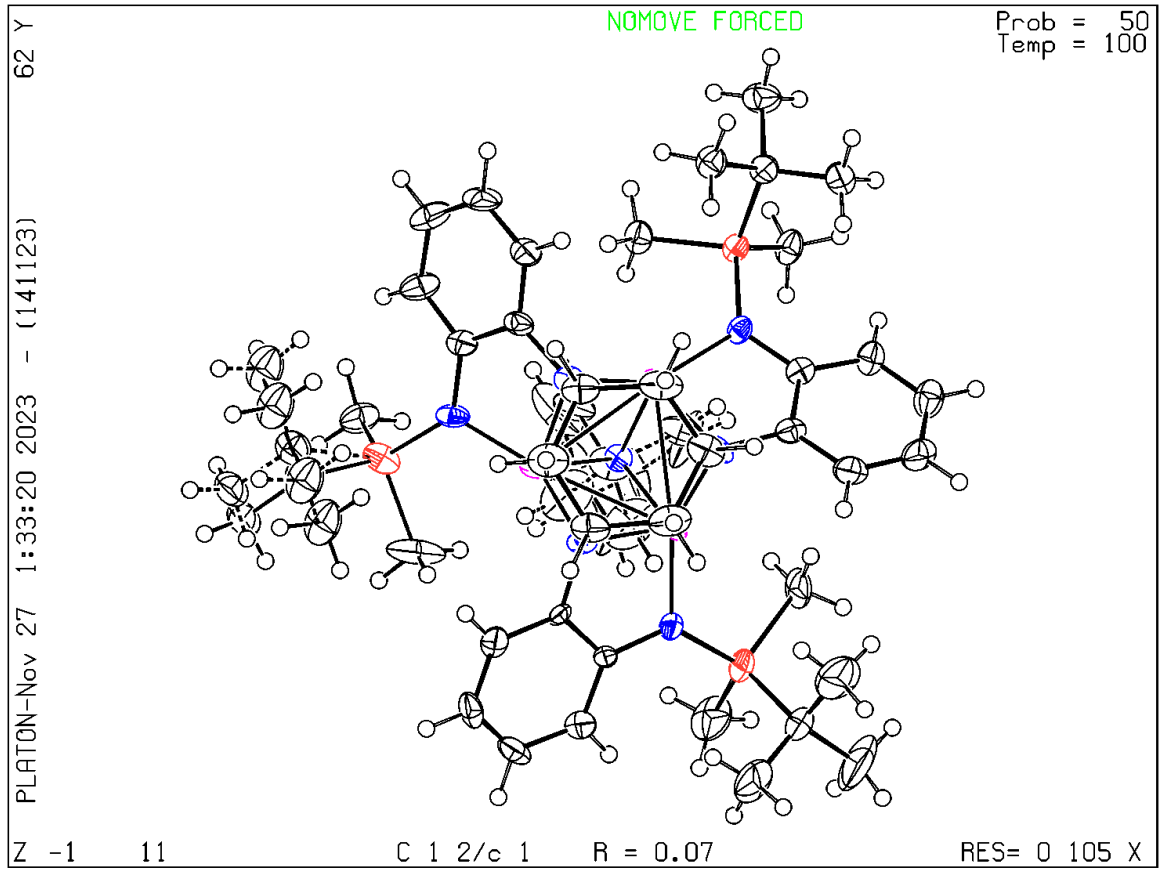



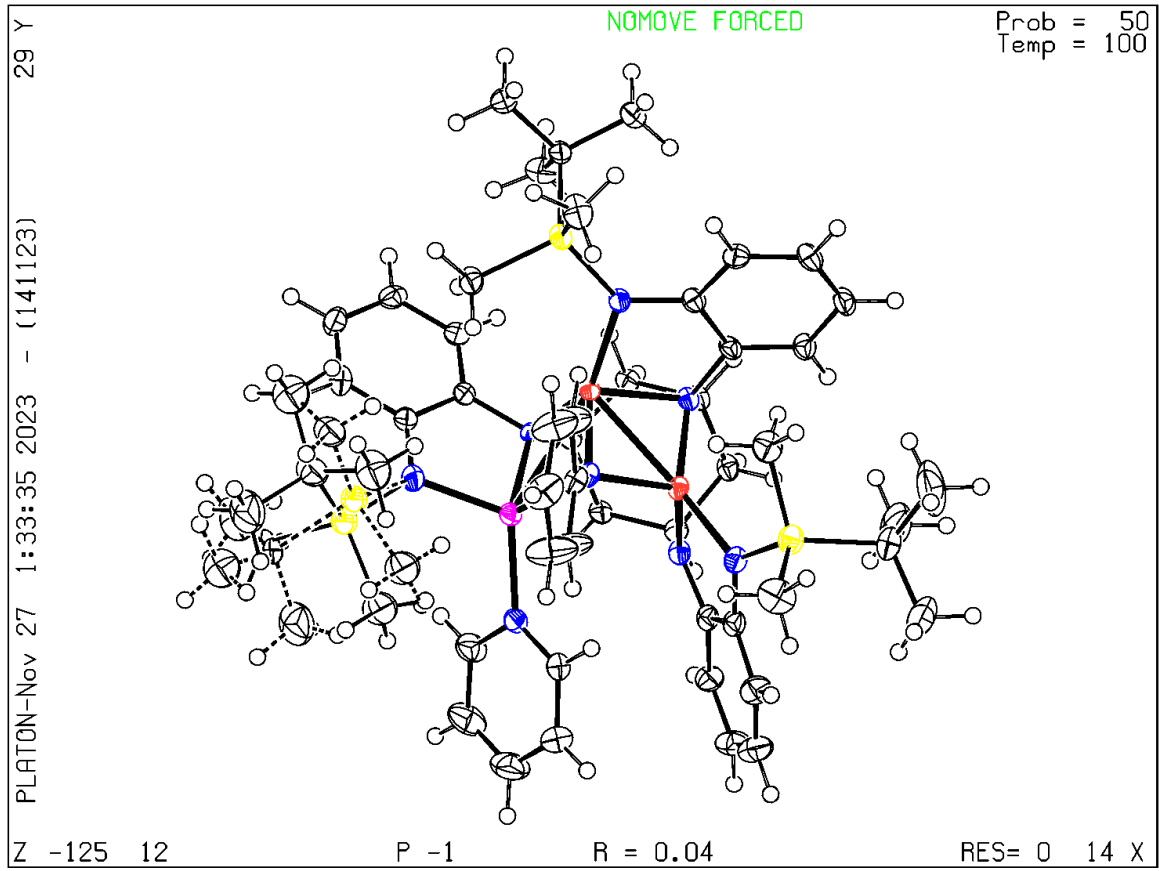

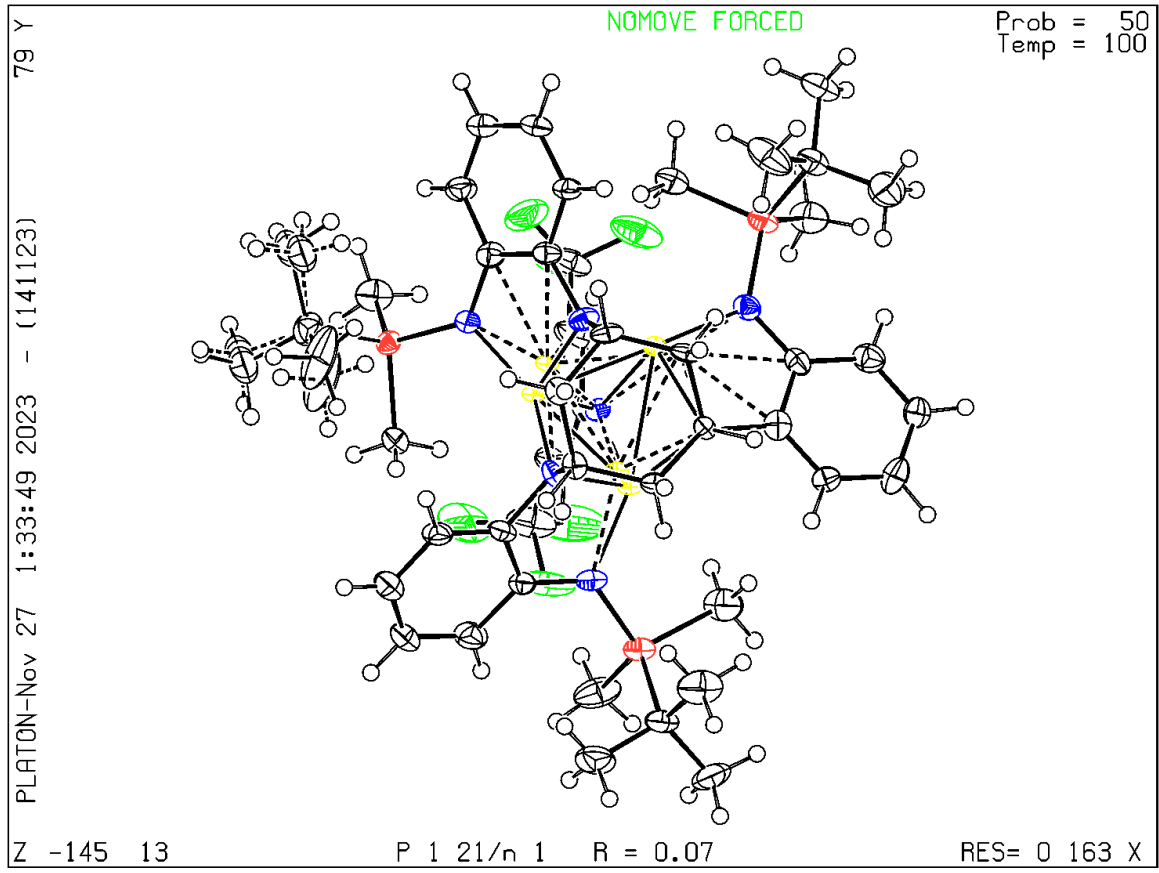

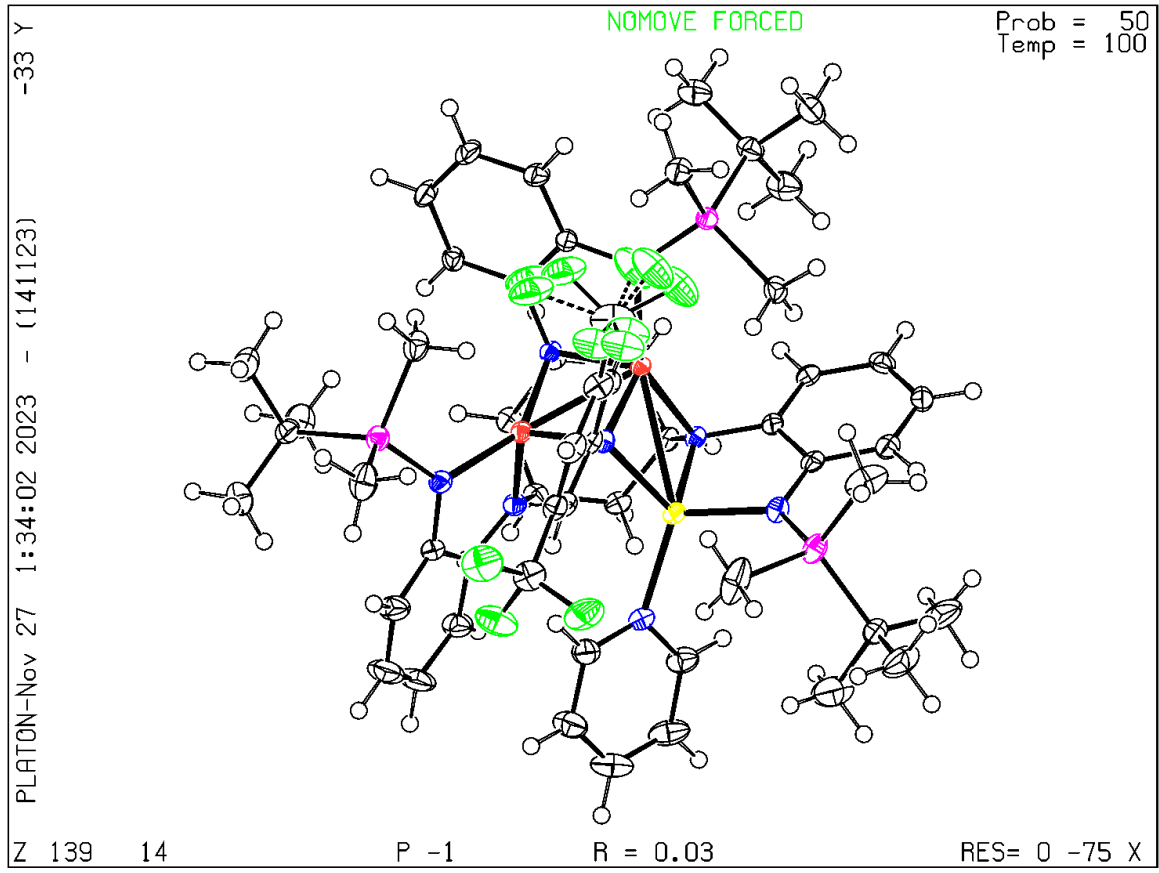

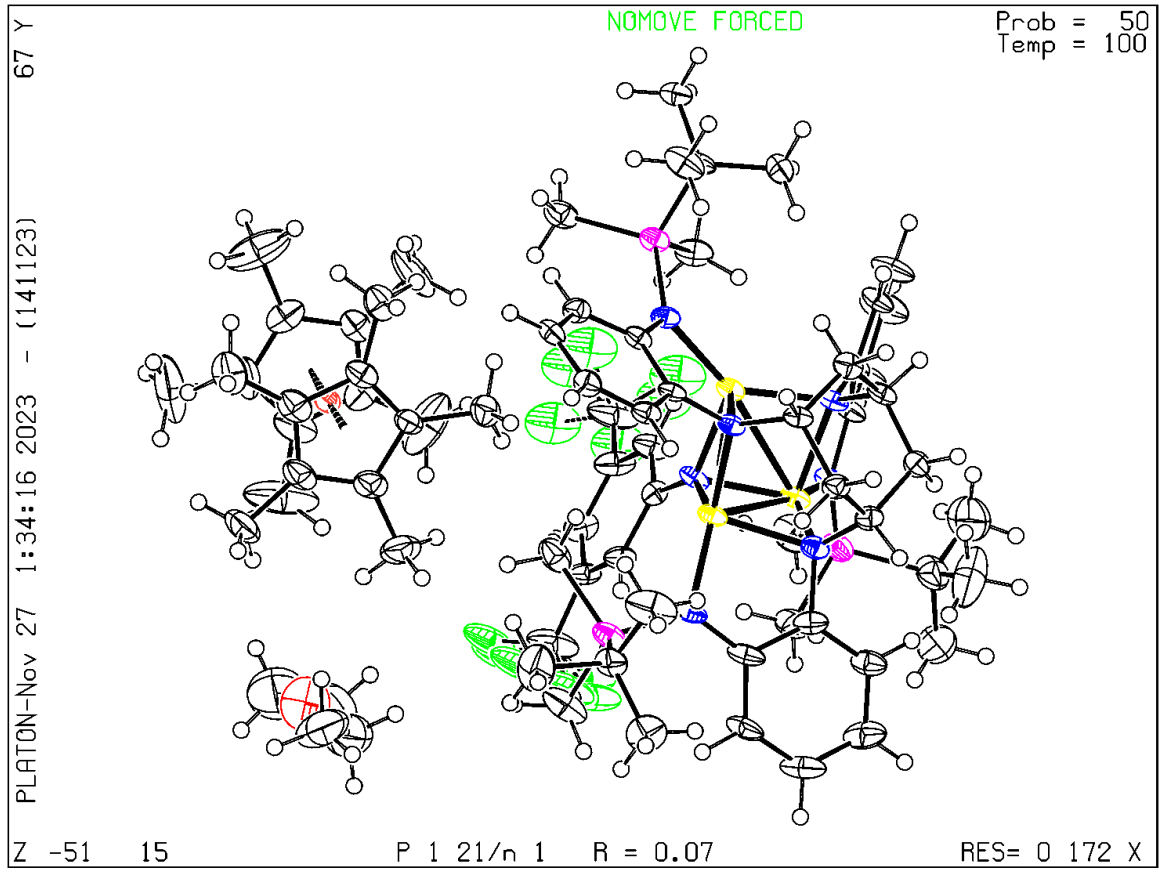

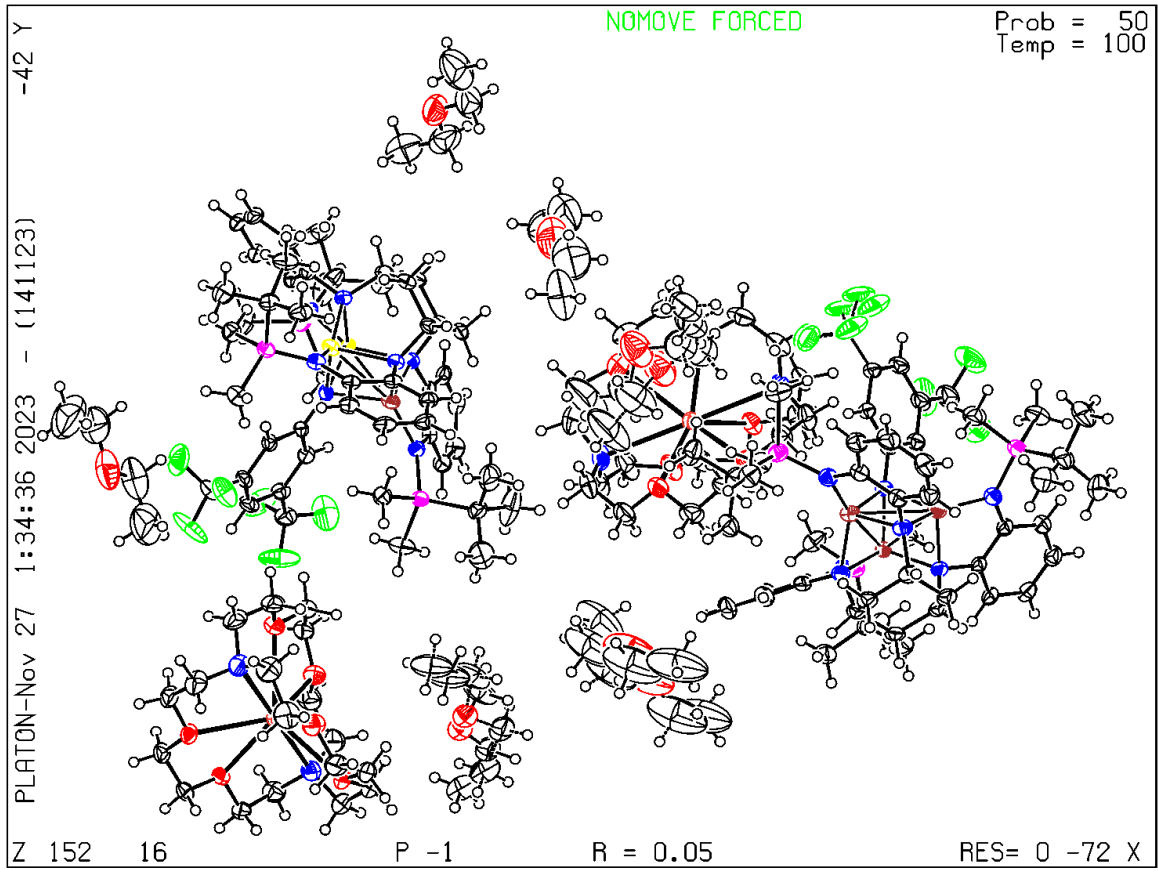

Supplement: d3sc03606e1.pdf [file d3sc03606e1.pdf]
